# Supplementary material for: Synthesis and biological evaluation of novel ursolic acid analogues as potential α-glucosidase inhibitors
Source: PubMed Central journal article supplement (PMC5372089; doi:10.1038/srep45578), 2017-03-30

# Synthesis and biological evaluation of novel ursolic acid analogues as potential $\alpha$ -glucosidase inhibitors

Pan-Pan Wu<sup>1,2,3</sup>, Bing-Jie Zhang<sup>1</sup>, Xi-Ping Cui<sup>1</sup>, Yang Yang<sup>1</sup>, Zheng-Yun Jiang<sup>1</sup>, Zhi-Hong Zhou<sup>1</sup>, Ying-Ying Zhong<sup>1</sup>, Yu-Ying Mai<sup>1</sup>, Zhong Ouyang<sup>1</sup>, Hui-Sheng Chen<sup>1</sup>, Jie Zheng<sup>1</sup>, Su-Qing Zhao<sup>1,3\*</sup>, Kun Zhang<sup>1,2,3\*</sup>

*1 Department of Pharmaceutical Engineering, Faculty of Chemical Engineering and Light Industry, Guangdong University of Technology, Guangzhou, 510006, China*

*2 Faculty of Chemical & Environmental Engineering, Wuyi University, Jiangmen, 529020, China*

*3 International Healthcare Innovation Institute (Jiangmen), Jiangmen, 529020, China*

*\*Corresponding Authors: sqzhao@gdut.edu.cn (S.-Q. Zhao), kzhang@gdut.edu.cn (K. Zhang)*

## Supplementary Data

Copies of <sup>1</sup>H NMR and <sup>13</sup>C NMR spectra of compounds **UA-01~UA-05** and **UA-O-a~UA-O-j**.

**Compound code: UA-01**

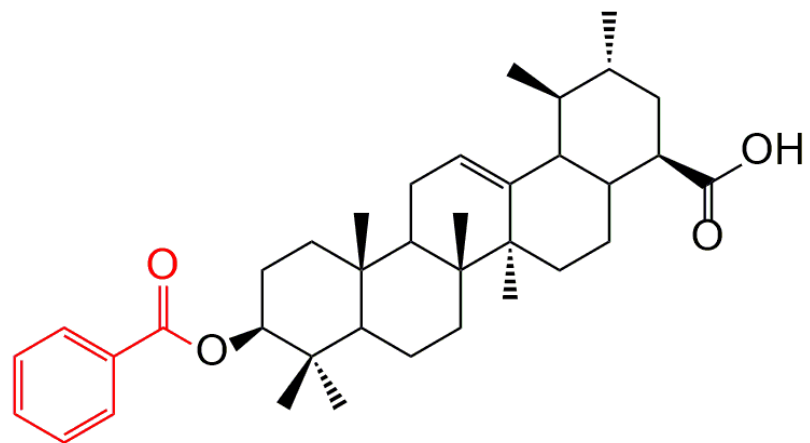

**Figure 1. The structure of compound UA-01.**

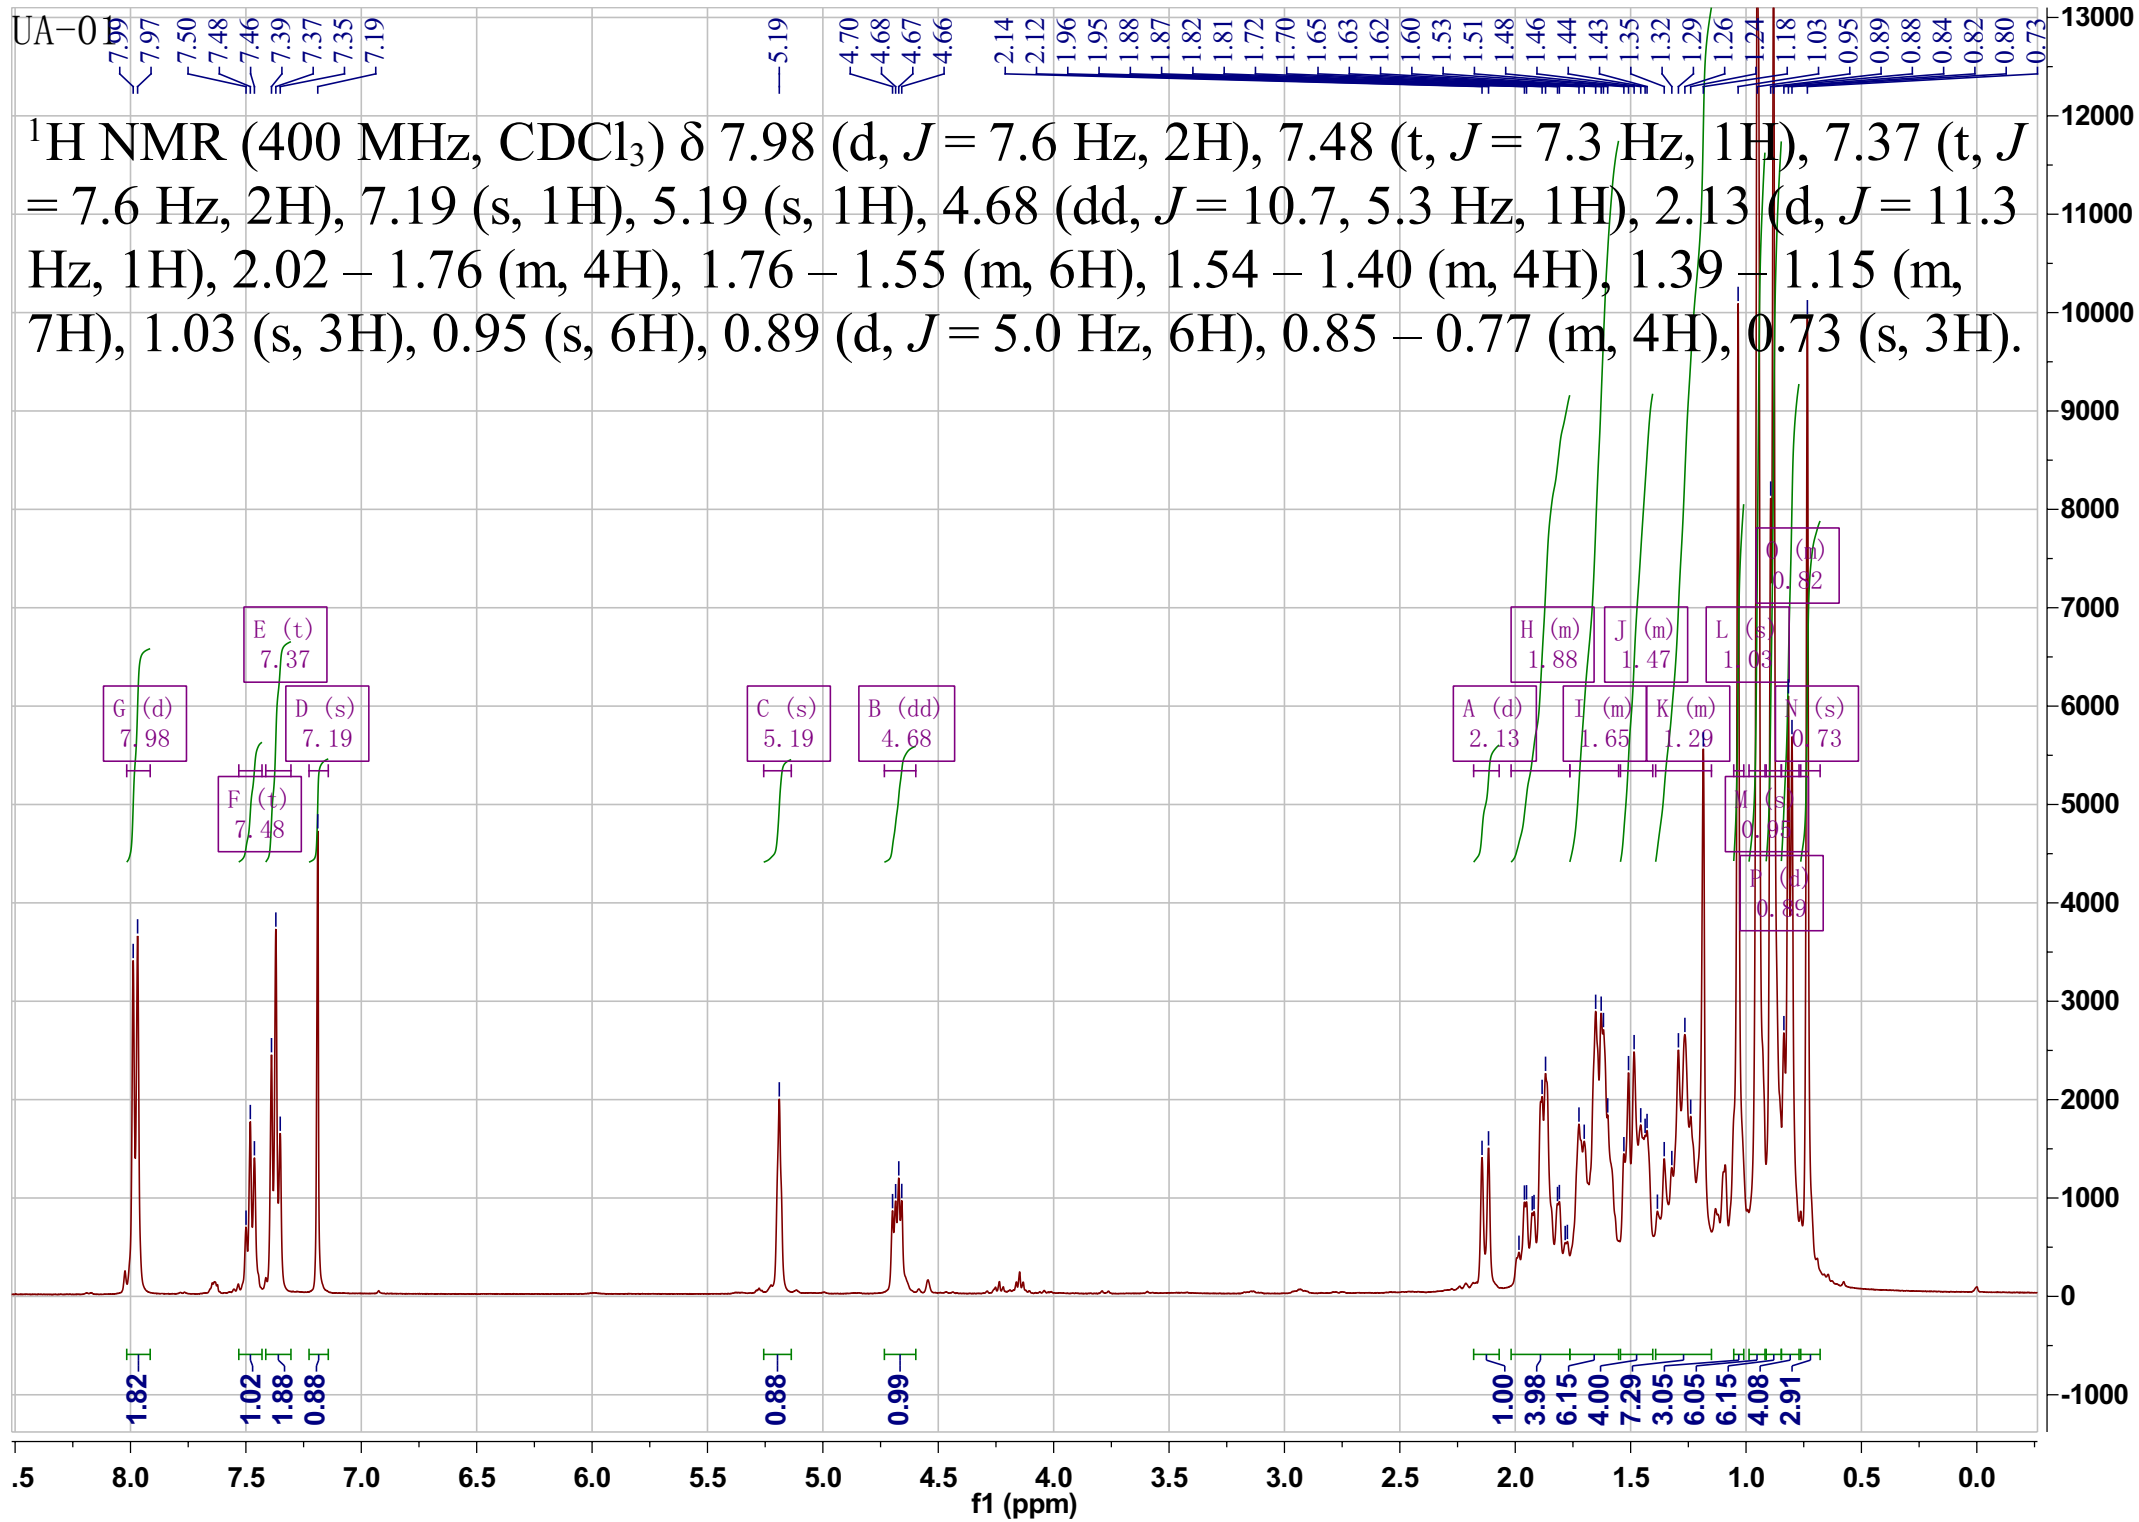

UA-01

$^{13}\text{C}$  NMR (100 MHz,  $\text{CDCl}_3$ )  $\delta$  182.75, 166.46, 138.15, 132.86, 131.19, 129.70, 128.47, 125.95, 81.77, 55.57, 52.79, 48.13, 47.67, 42.16, 39.72, 39.22, 39.01, 38.49, 38.28, 37.14, 36.89, 33.07, 30.78, 29.85, 28.42, 28.18, 24.29, 23.77, 23.50, 21.33, 18.38, 17.27, 17.18, 17.16, 15.72.

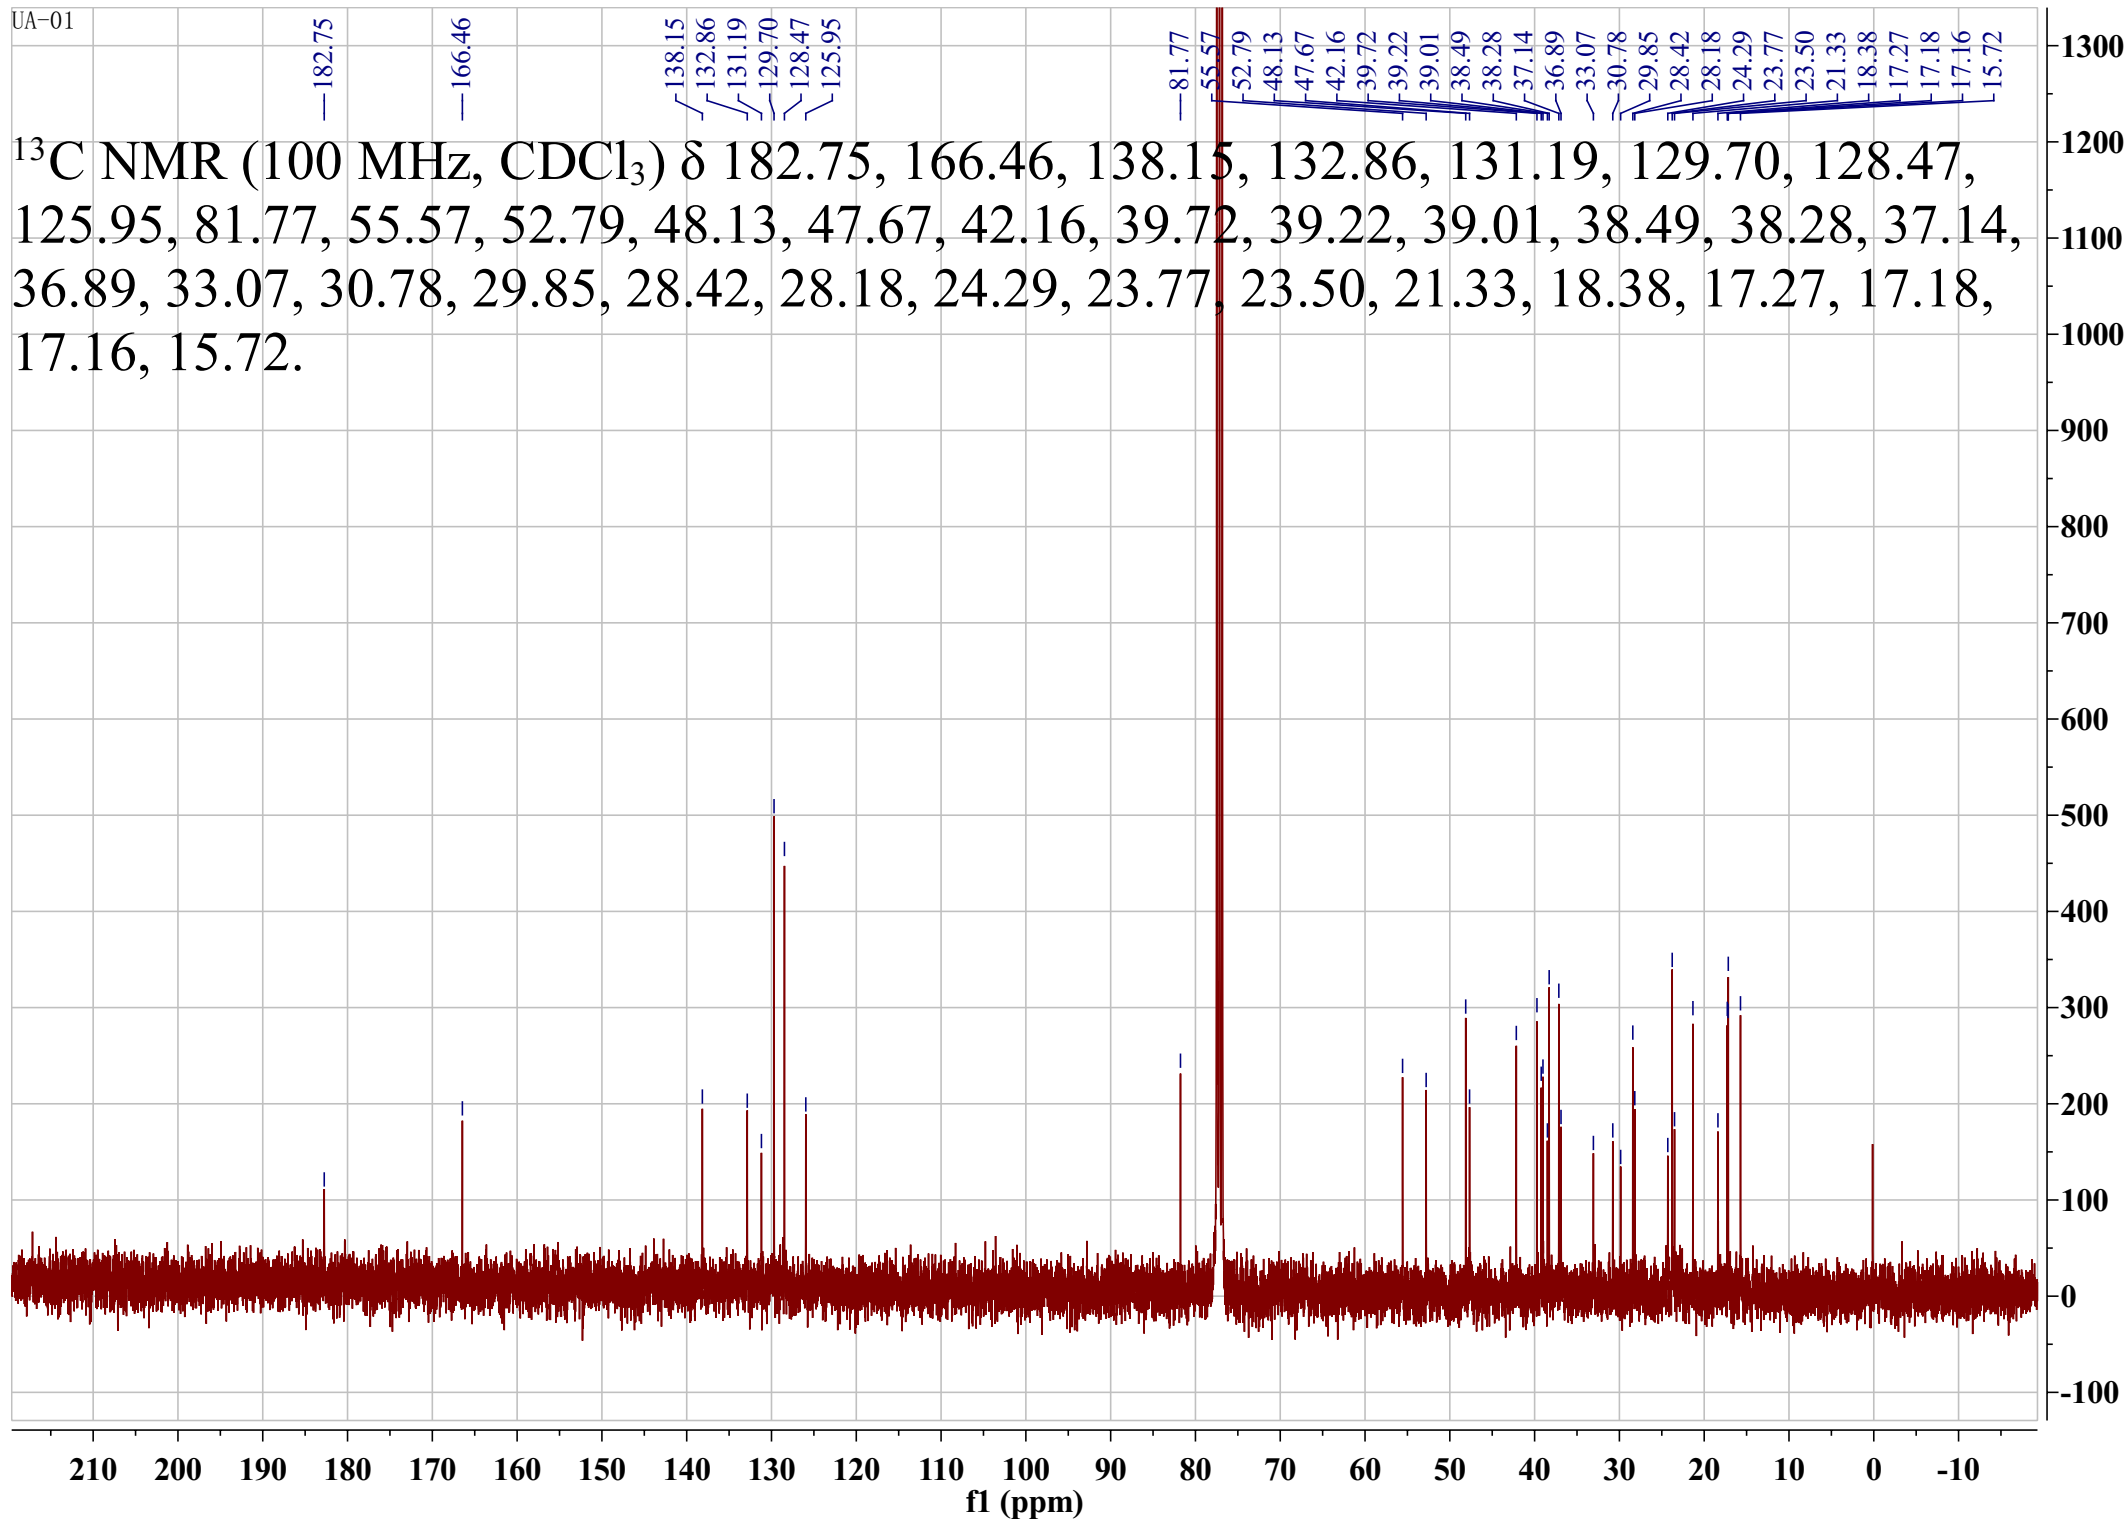

**Compound code: UA-02**

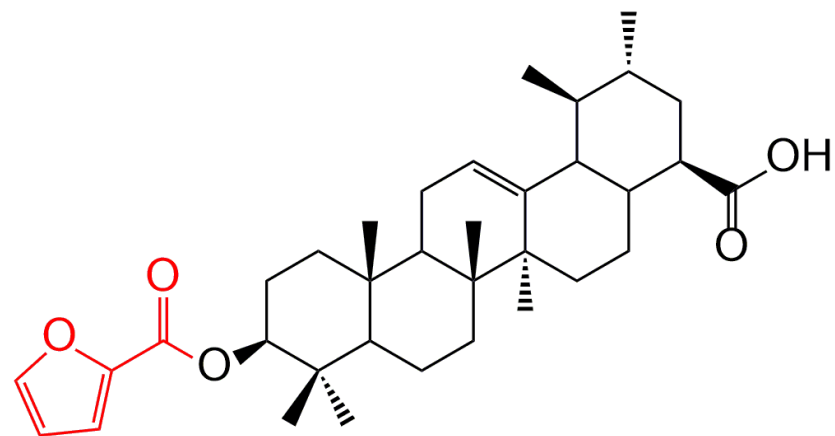

**Figure 2. The structure of compound UA-02.**

UA-02 PURE

$^1\text{H}$  NMR (400 MHz,  $\text{CDCl}_3$ )  $\delta$  7.57 (s, 1H), 7.13 (d,  $J = 2.9$  Hz, 1H), 6.49 (d,  $J = 1.0$  Hz, 1H), 5.23 (s, 1H), 4.72 (t, 1H), 2.18 (d,  $J = 11.1$  Hz, 1H), 2.06 – 1.81 (m, 4H), 1.80 – 1.61 (m, 6H), 1.59 – 1.45 (m, 4H), 1.43 – 1.24 (m, 7H), 1.08 (s, 4H), 0.99 (s, 3H), 0.94 (d,  $J = 12.9$  Hz, 9H), 0.86 (d,  $J = 6.3$  Hz, 4H), 0.77 (s, 3H).

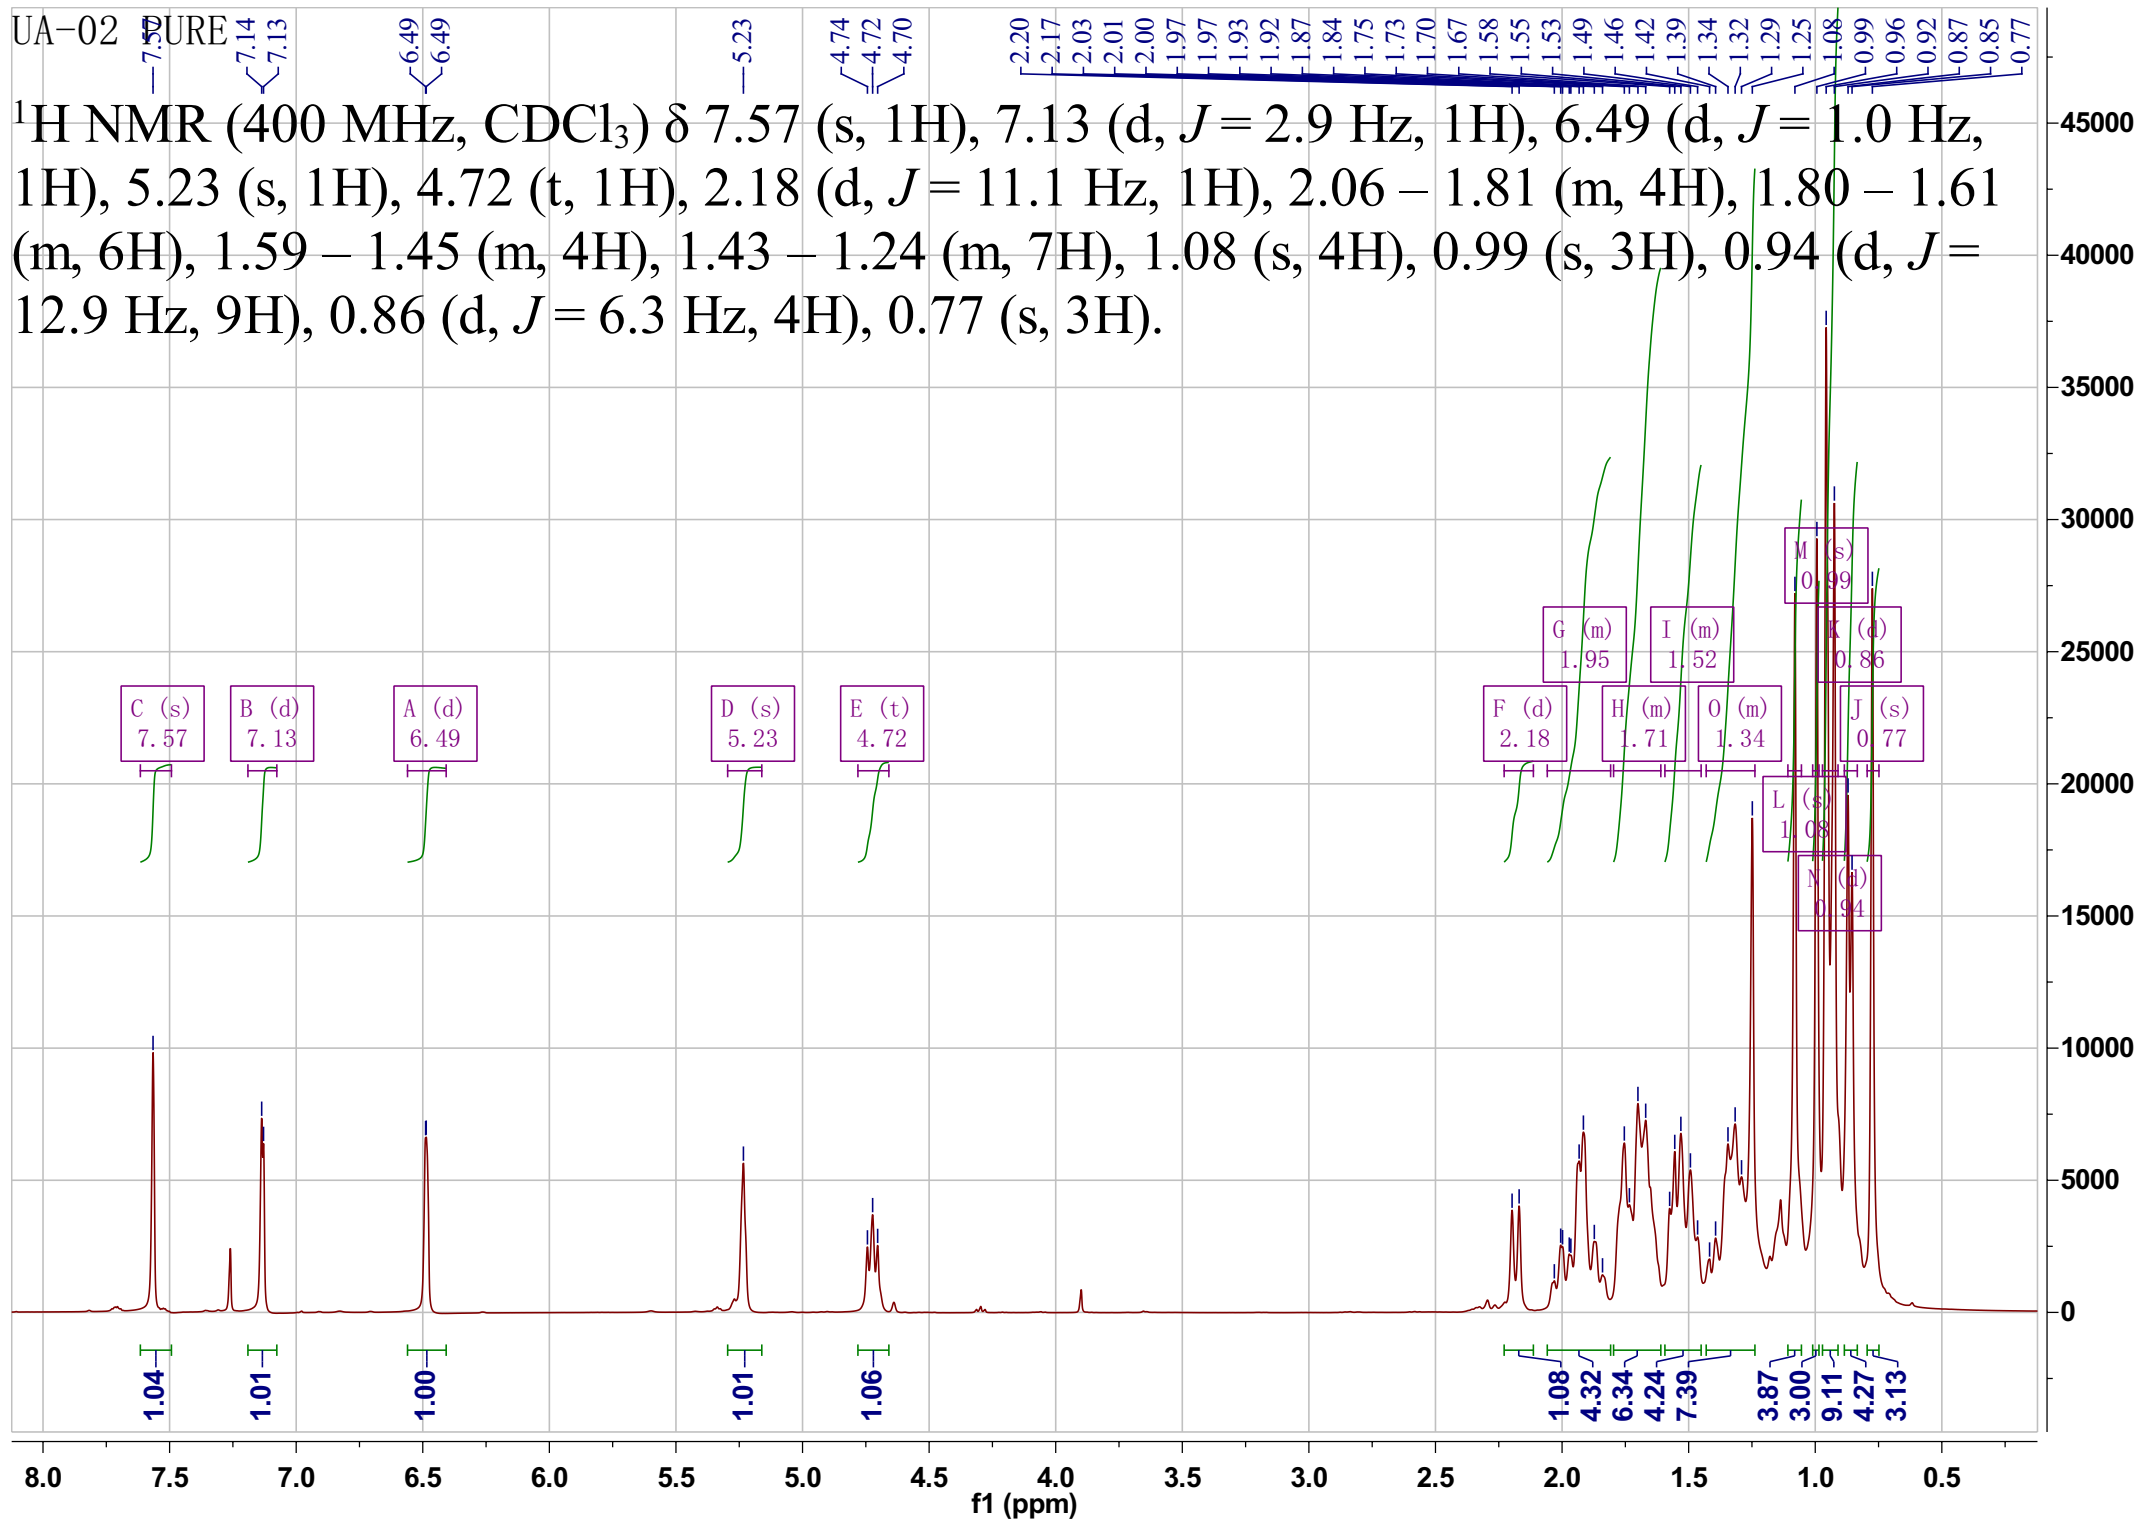

UA-02 PURE

$^{13}\text{C}$  NMR (100 MHz,  $\text{CDCl}_3$ )  $\delta$  184.38, 158.79, 146.22, 145.36, 138.11, 125.82, 117.47, 111.77, 81.79, 55.46, 52.62, 48.11, 47.61, 42.03, 39.65, 39.14, 38.96, 38.40, 38.17, 37.07, 32.97, 30.73, 29.81, 28.28, 28.12, 24.15, 23.80, 23.74, 23.43, 21.29, 18.30, 17.24, 17.14, 16.93, 15.67.

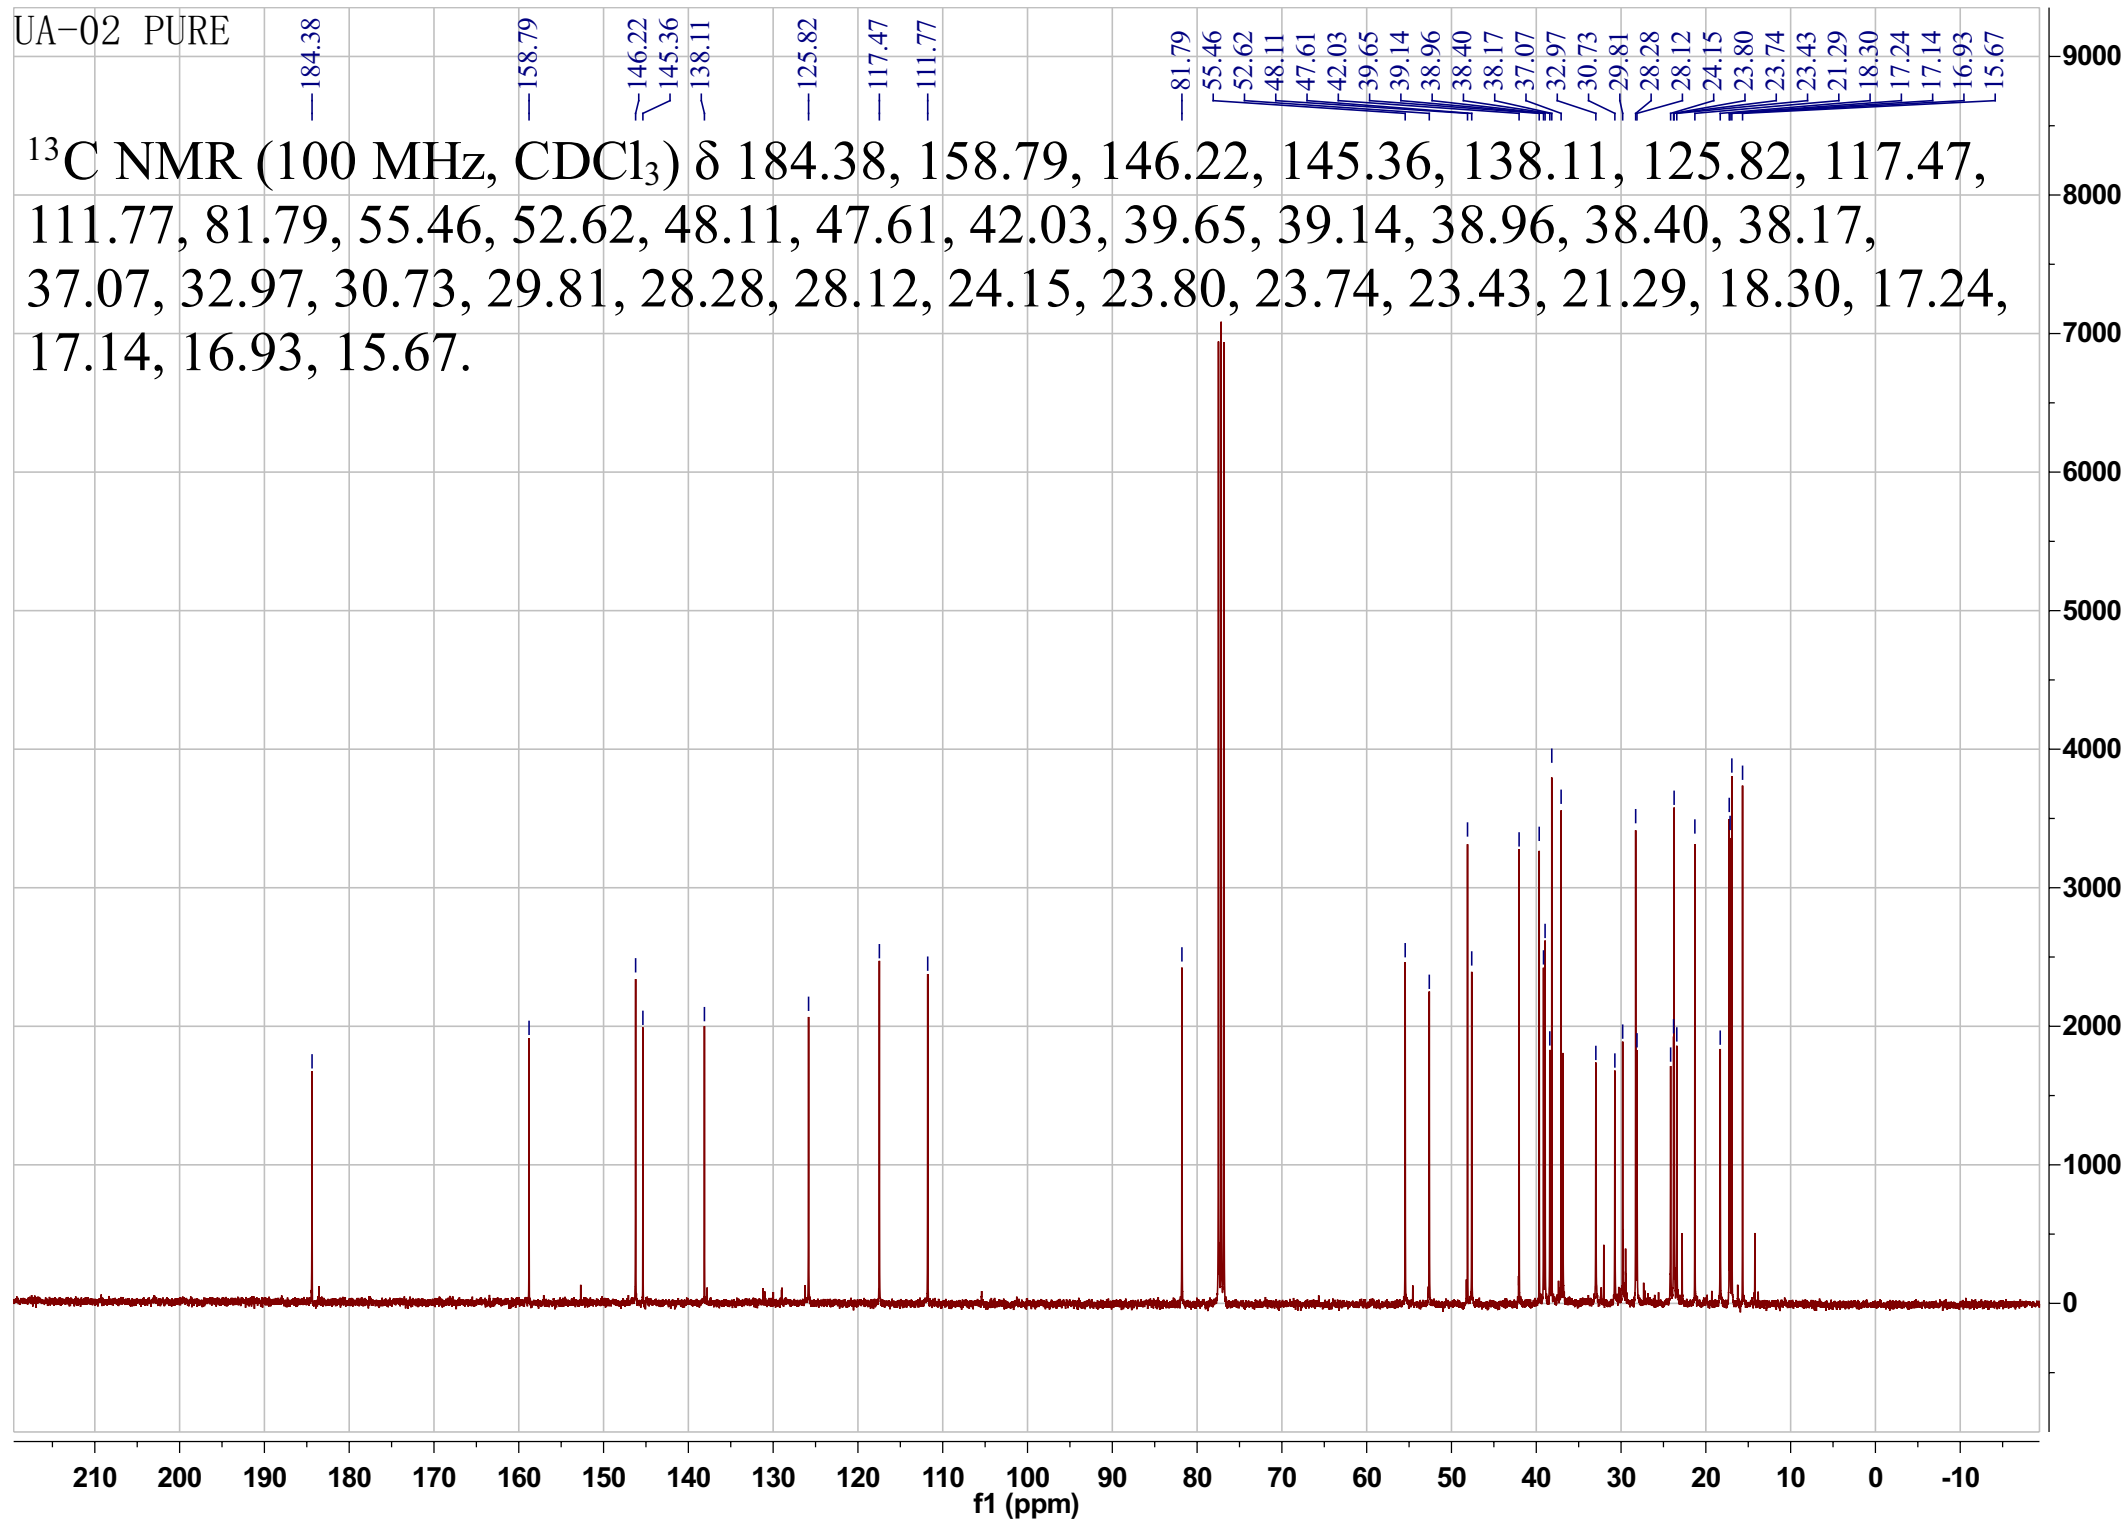

**Compound code: UA-03**

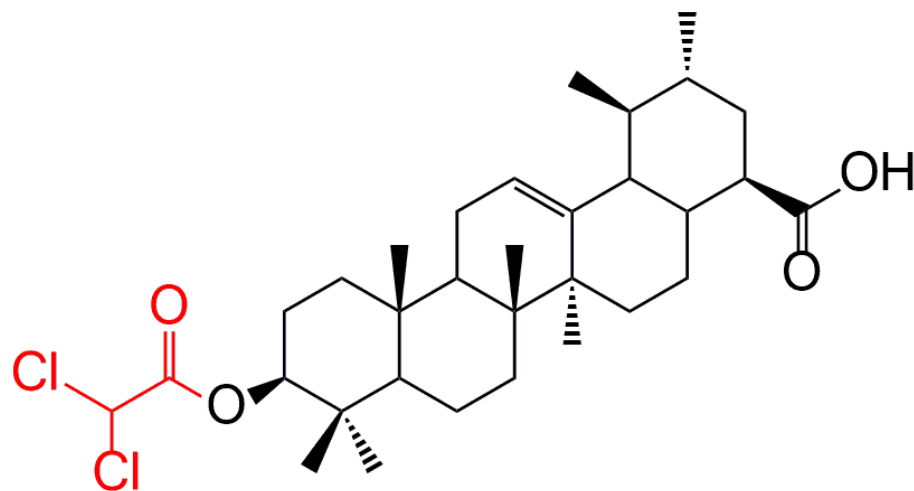

**Figure 3. The structure of compound UA-03.**



UA-03

$^1\text{H}$  NMR (400 MHz,  $\text{CDCl}_3$ )  $\delta$  5.94 (s, 1H), 5.24 (s, 1H), 4.62 (dd,  $J = 10.6, 4.7$  Hz, 1H), 2.19 (d,  $J = 11.1$  Hz, 1H), 2.06 – 1.87 (m, 4H), 1.76 – 1.65 (m, 6H), 1.59 – 1.48 (m, 4H), 1.36 – 1.24 (m, 10H), 1.08 (s, 3H), 0.97 (d,  $J = 8.3$  Hz, 5H), 0.92 (d,  $J = 7.8$  Hz, 6H), 0.86 (d,  $J = 6.0$  Hz, 4H), 0.78 (s, 3H).

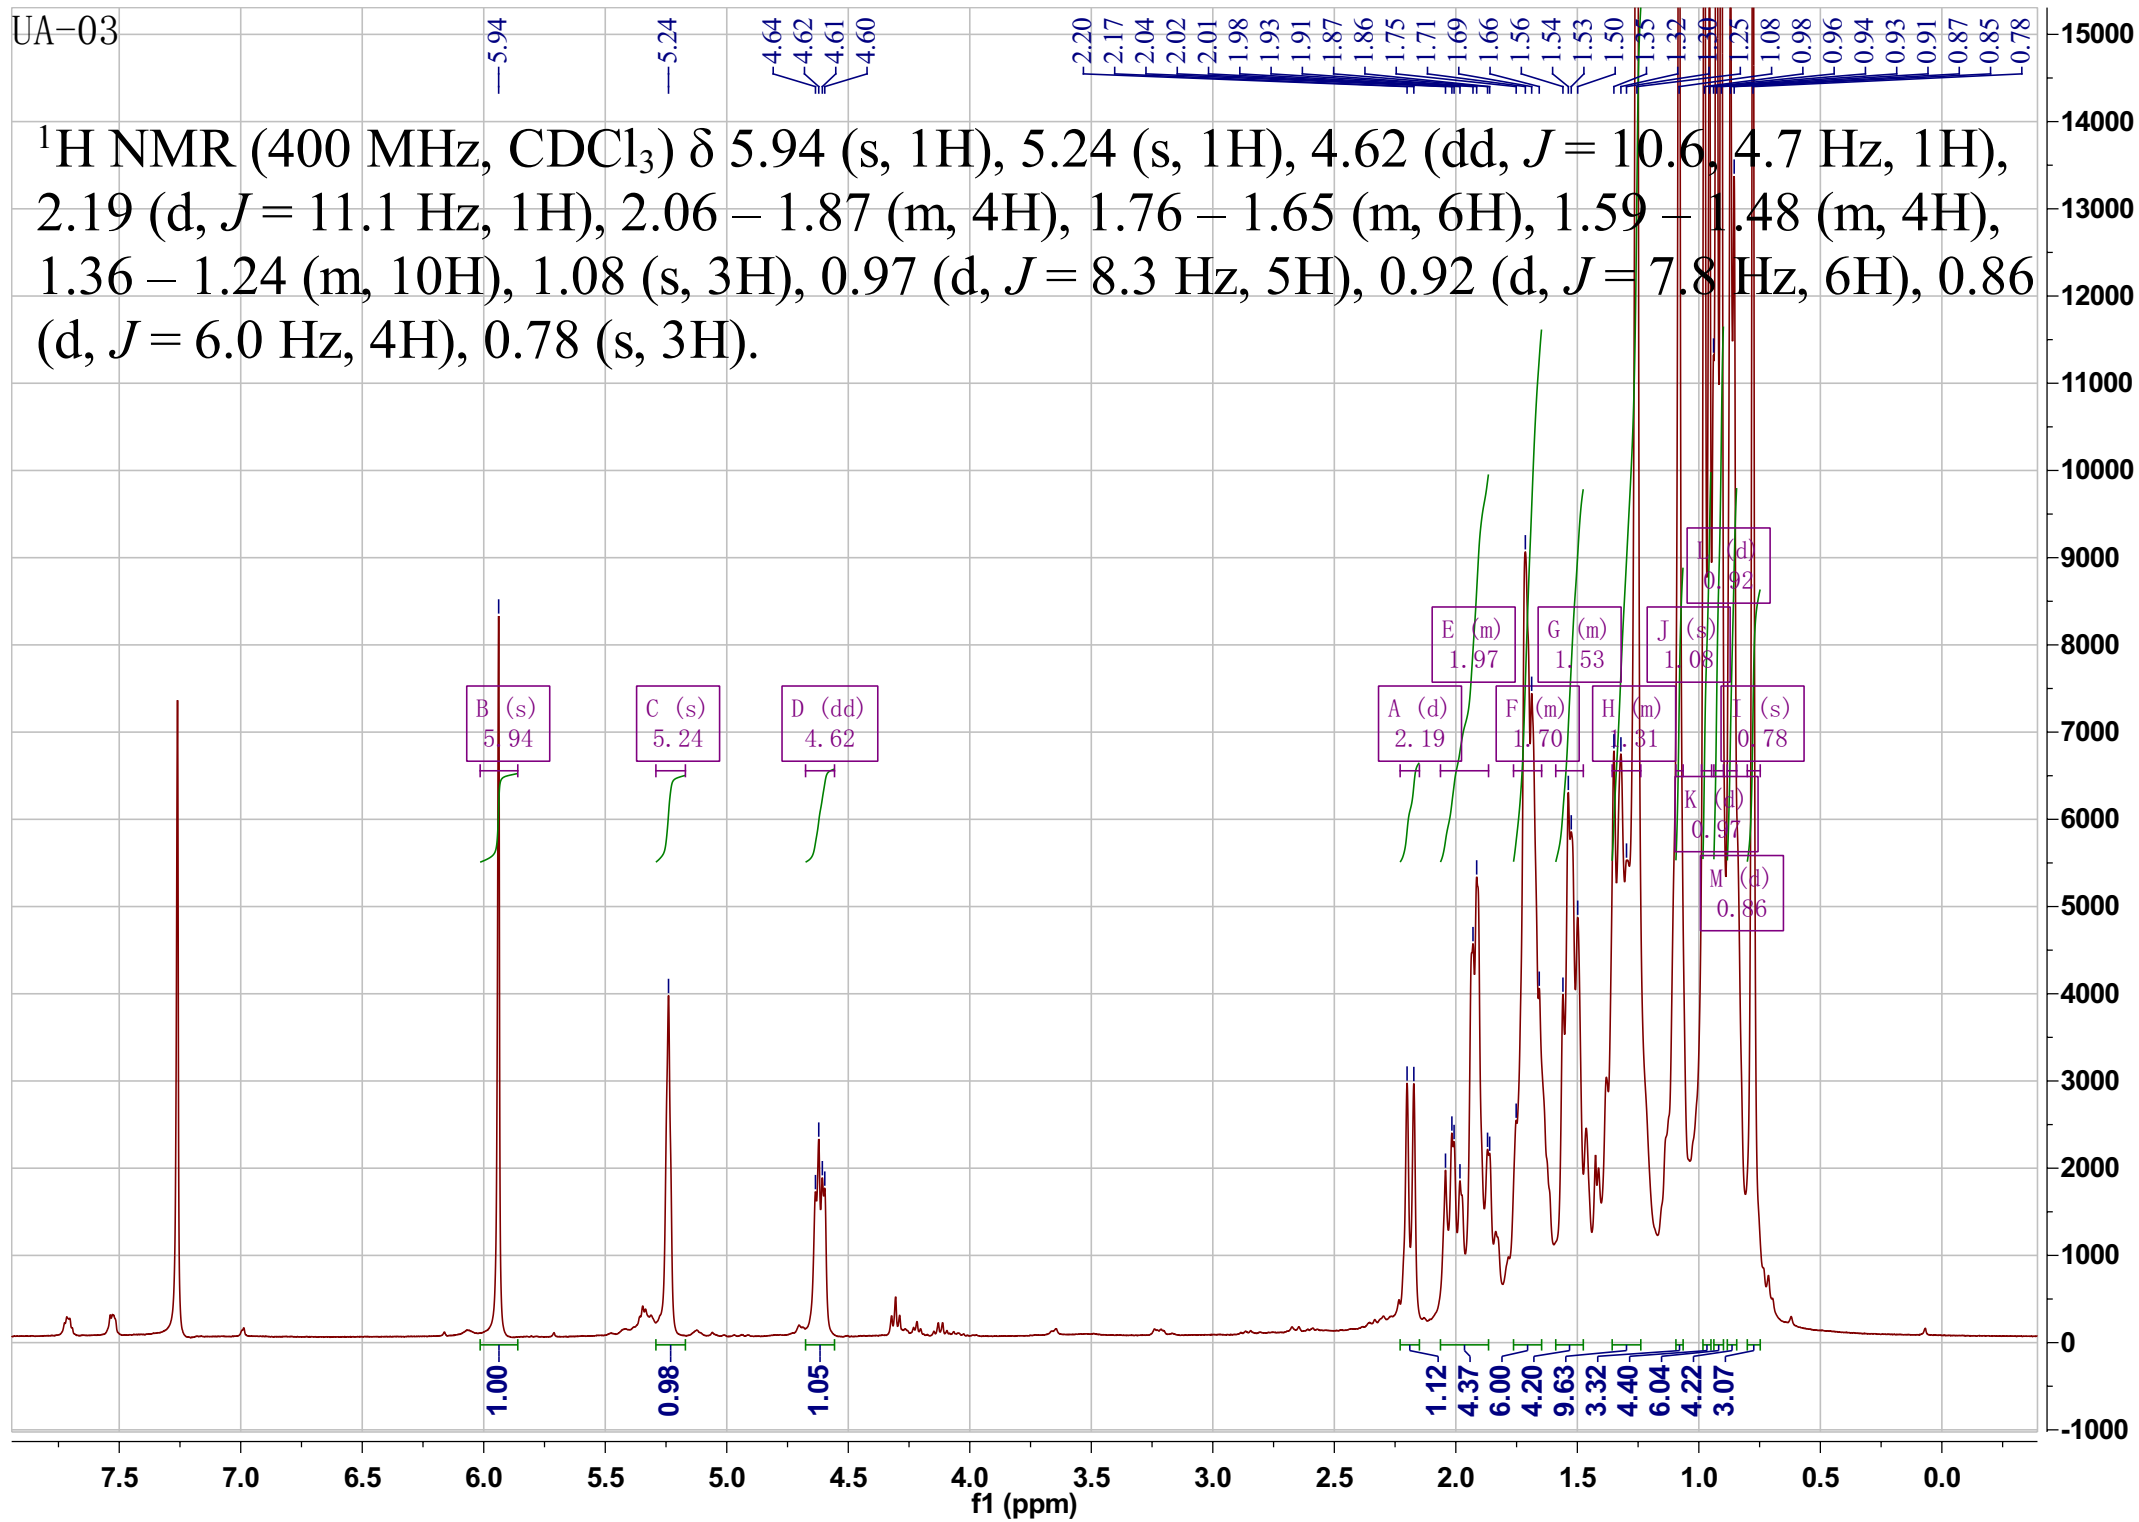

UA03

$^{13}\text{C}$  NMR (100 MHz,  $\text{CDCl}_3$ )  $\delta$  183.28, 164.46, 138.19, 125.77, 85.13, 64.98, 55.45, 52.73, 48.12, 47.63, 42.12, 39.68, 39.20, 39.00, 38.32, 37.08, 36.87, 32.99, 30.76, 29.85, 28.13, 24.23, 23.75, 23.45, 23.27, 22.83, 21.31, 18.24, 17.25, 17.15, 16.71, 15.67.

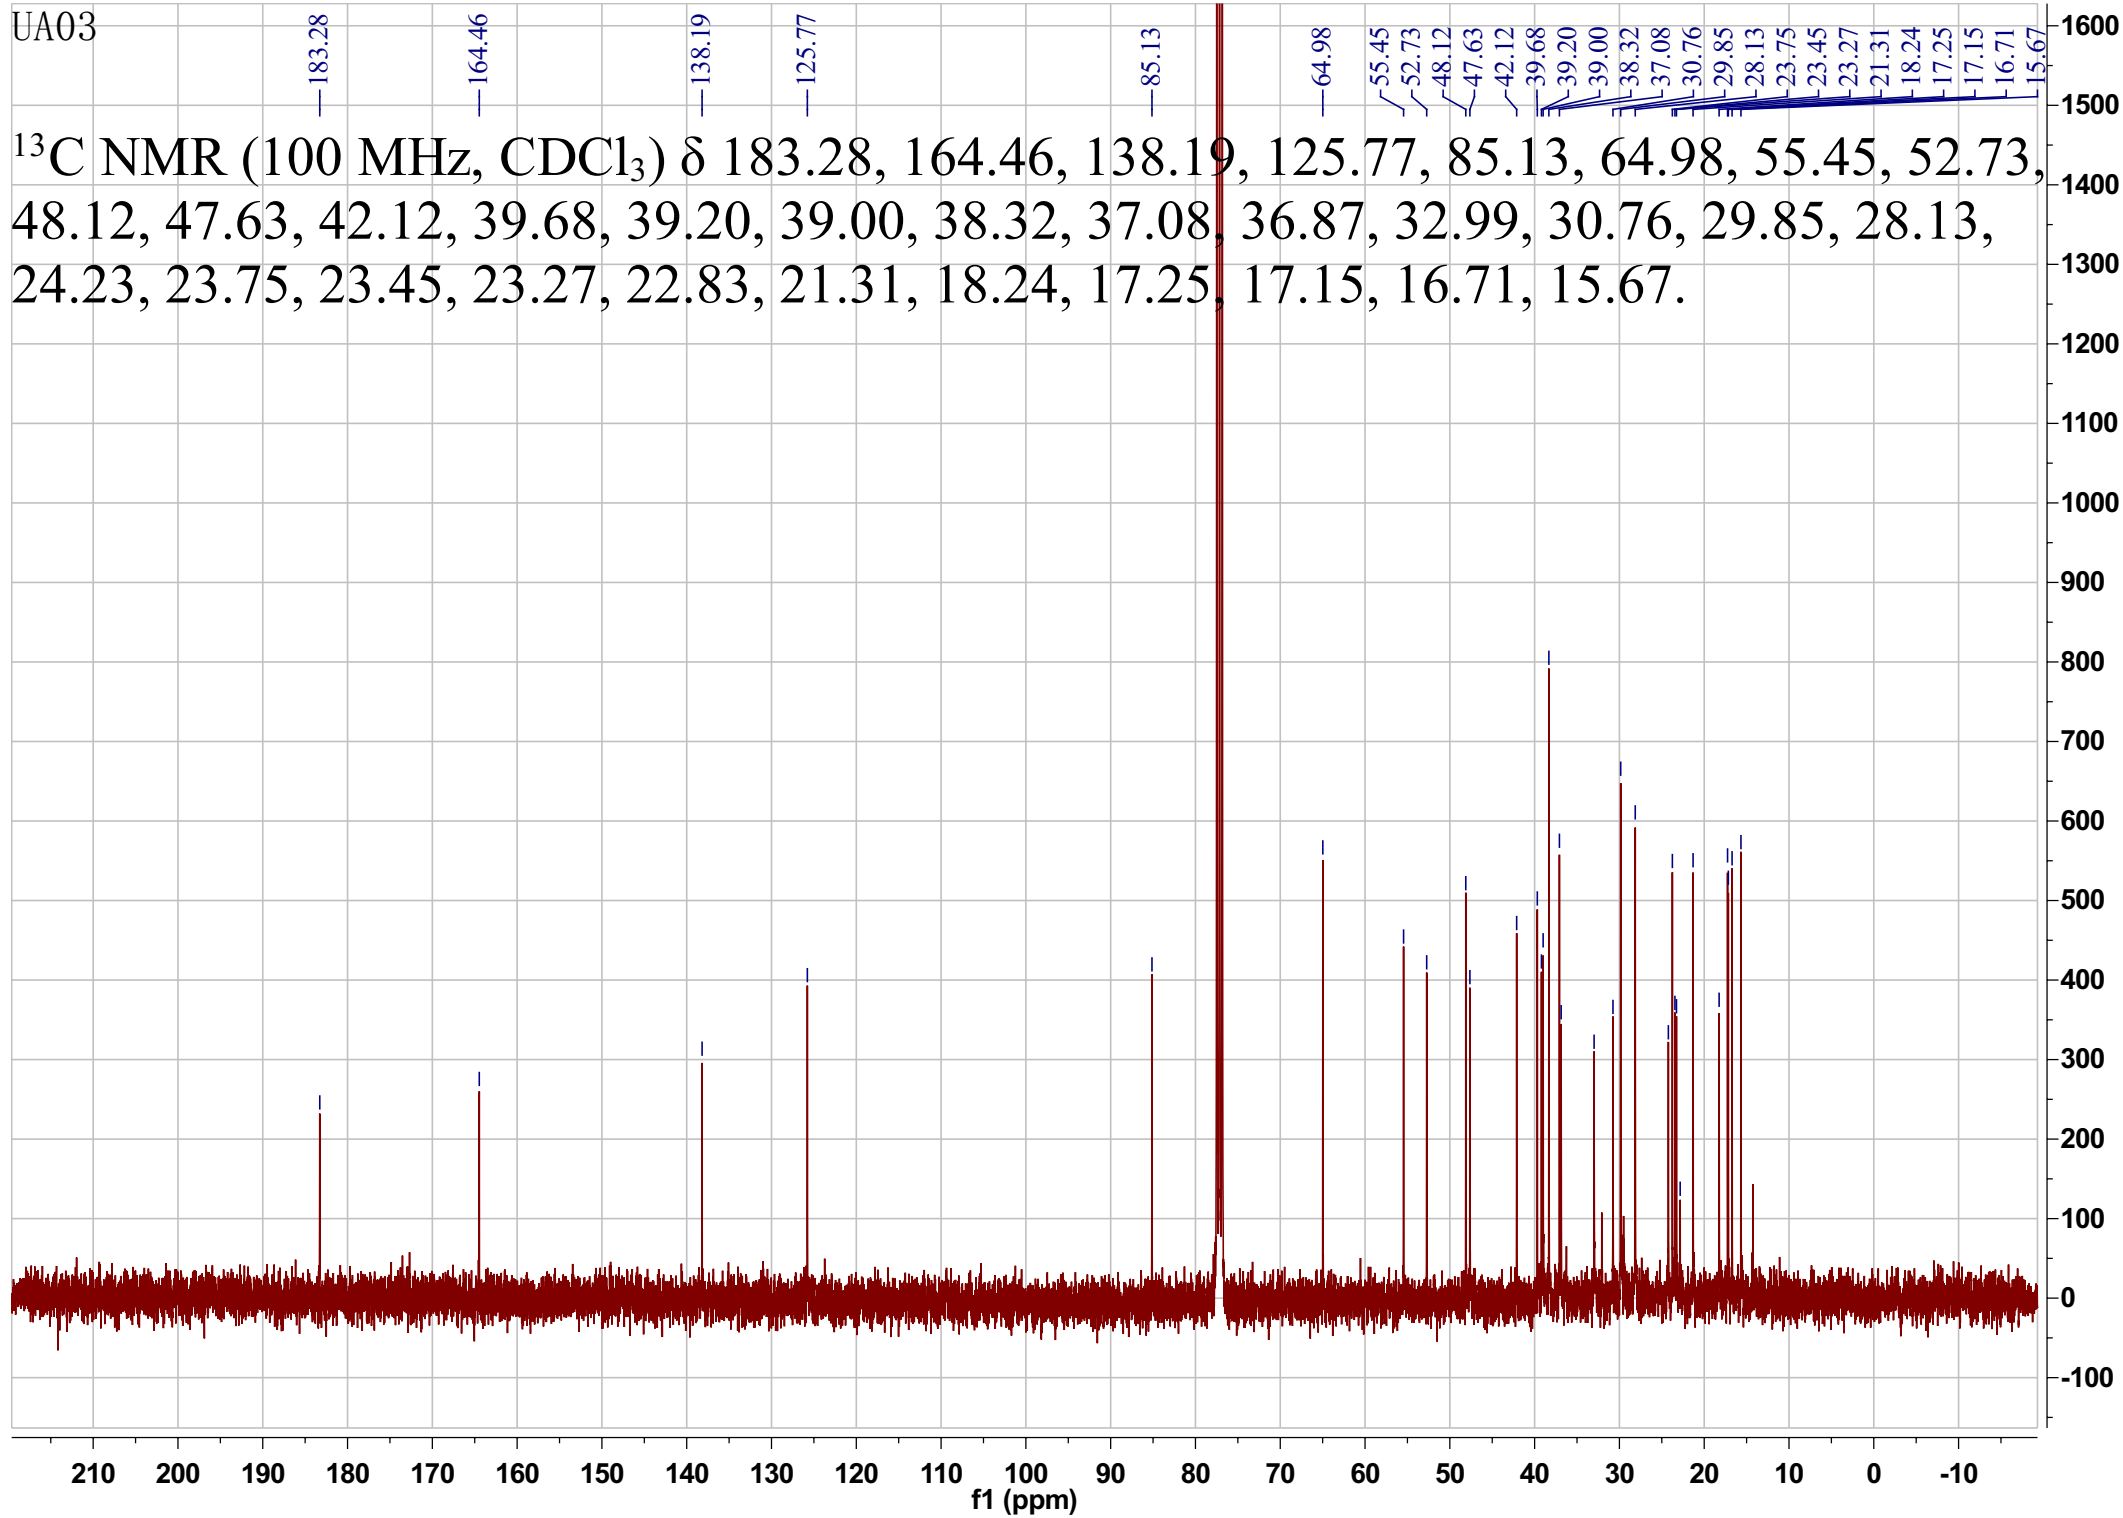

**Compound code: UA-04**

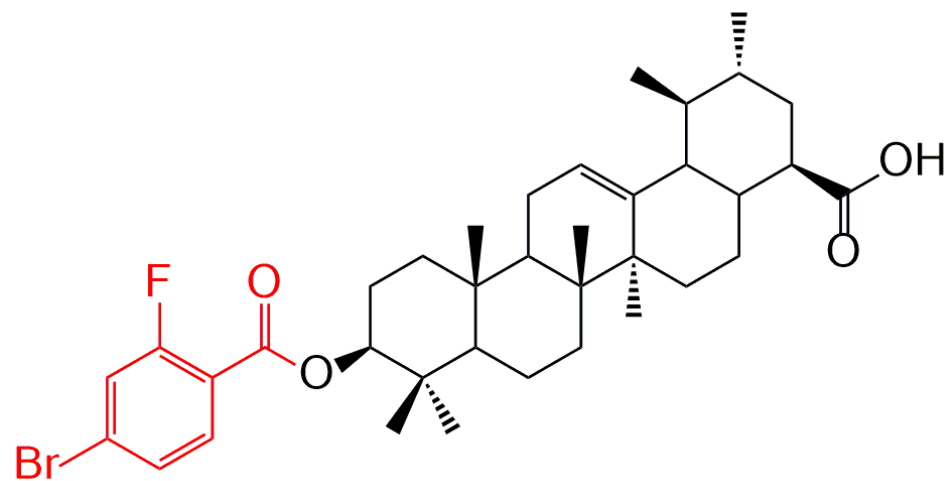

**Figure 4. The structure of compound UA-04.**

UA-09

$^1\text{H}$  NMR (400 MHz,  $\text{CDCl}_3$ )  $\delta$  7.81 (t,  $J = 7.9$  Hz, 1H), 7.34 (t,  $J = 9.8$  Hz, 2H), 5.25 (s, 1H), 4.74 (dd,  $J = 11.0, 4.6$  Hz, 1H), 2.20 (d,  $J = 11.2$  Hz, 1H), 2.07 – 1.98 (m, 1H), 1.97 – 1.86 (m, 3H), 1.81 – 1.67 (m, 5H), 1.60 – 1.46 (m, 4H), 1.42 (d,  $J = 5.7$  Hz, 1H), 1.39 – 1.29 (m, 4H), 1.26 (s, 5H), 1.10 (s, 3H), 1.00 (s, 3H), 0.96 (d,  $J = 5.9$  Hz, 8H), 0.87 (d,  $J = 6.3$  Hz, 4H), 0.80 (s, 3H).

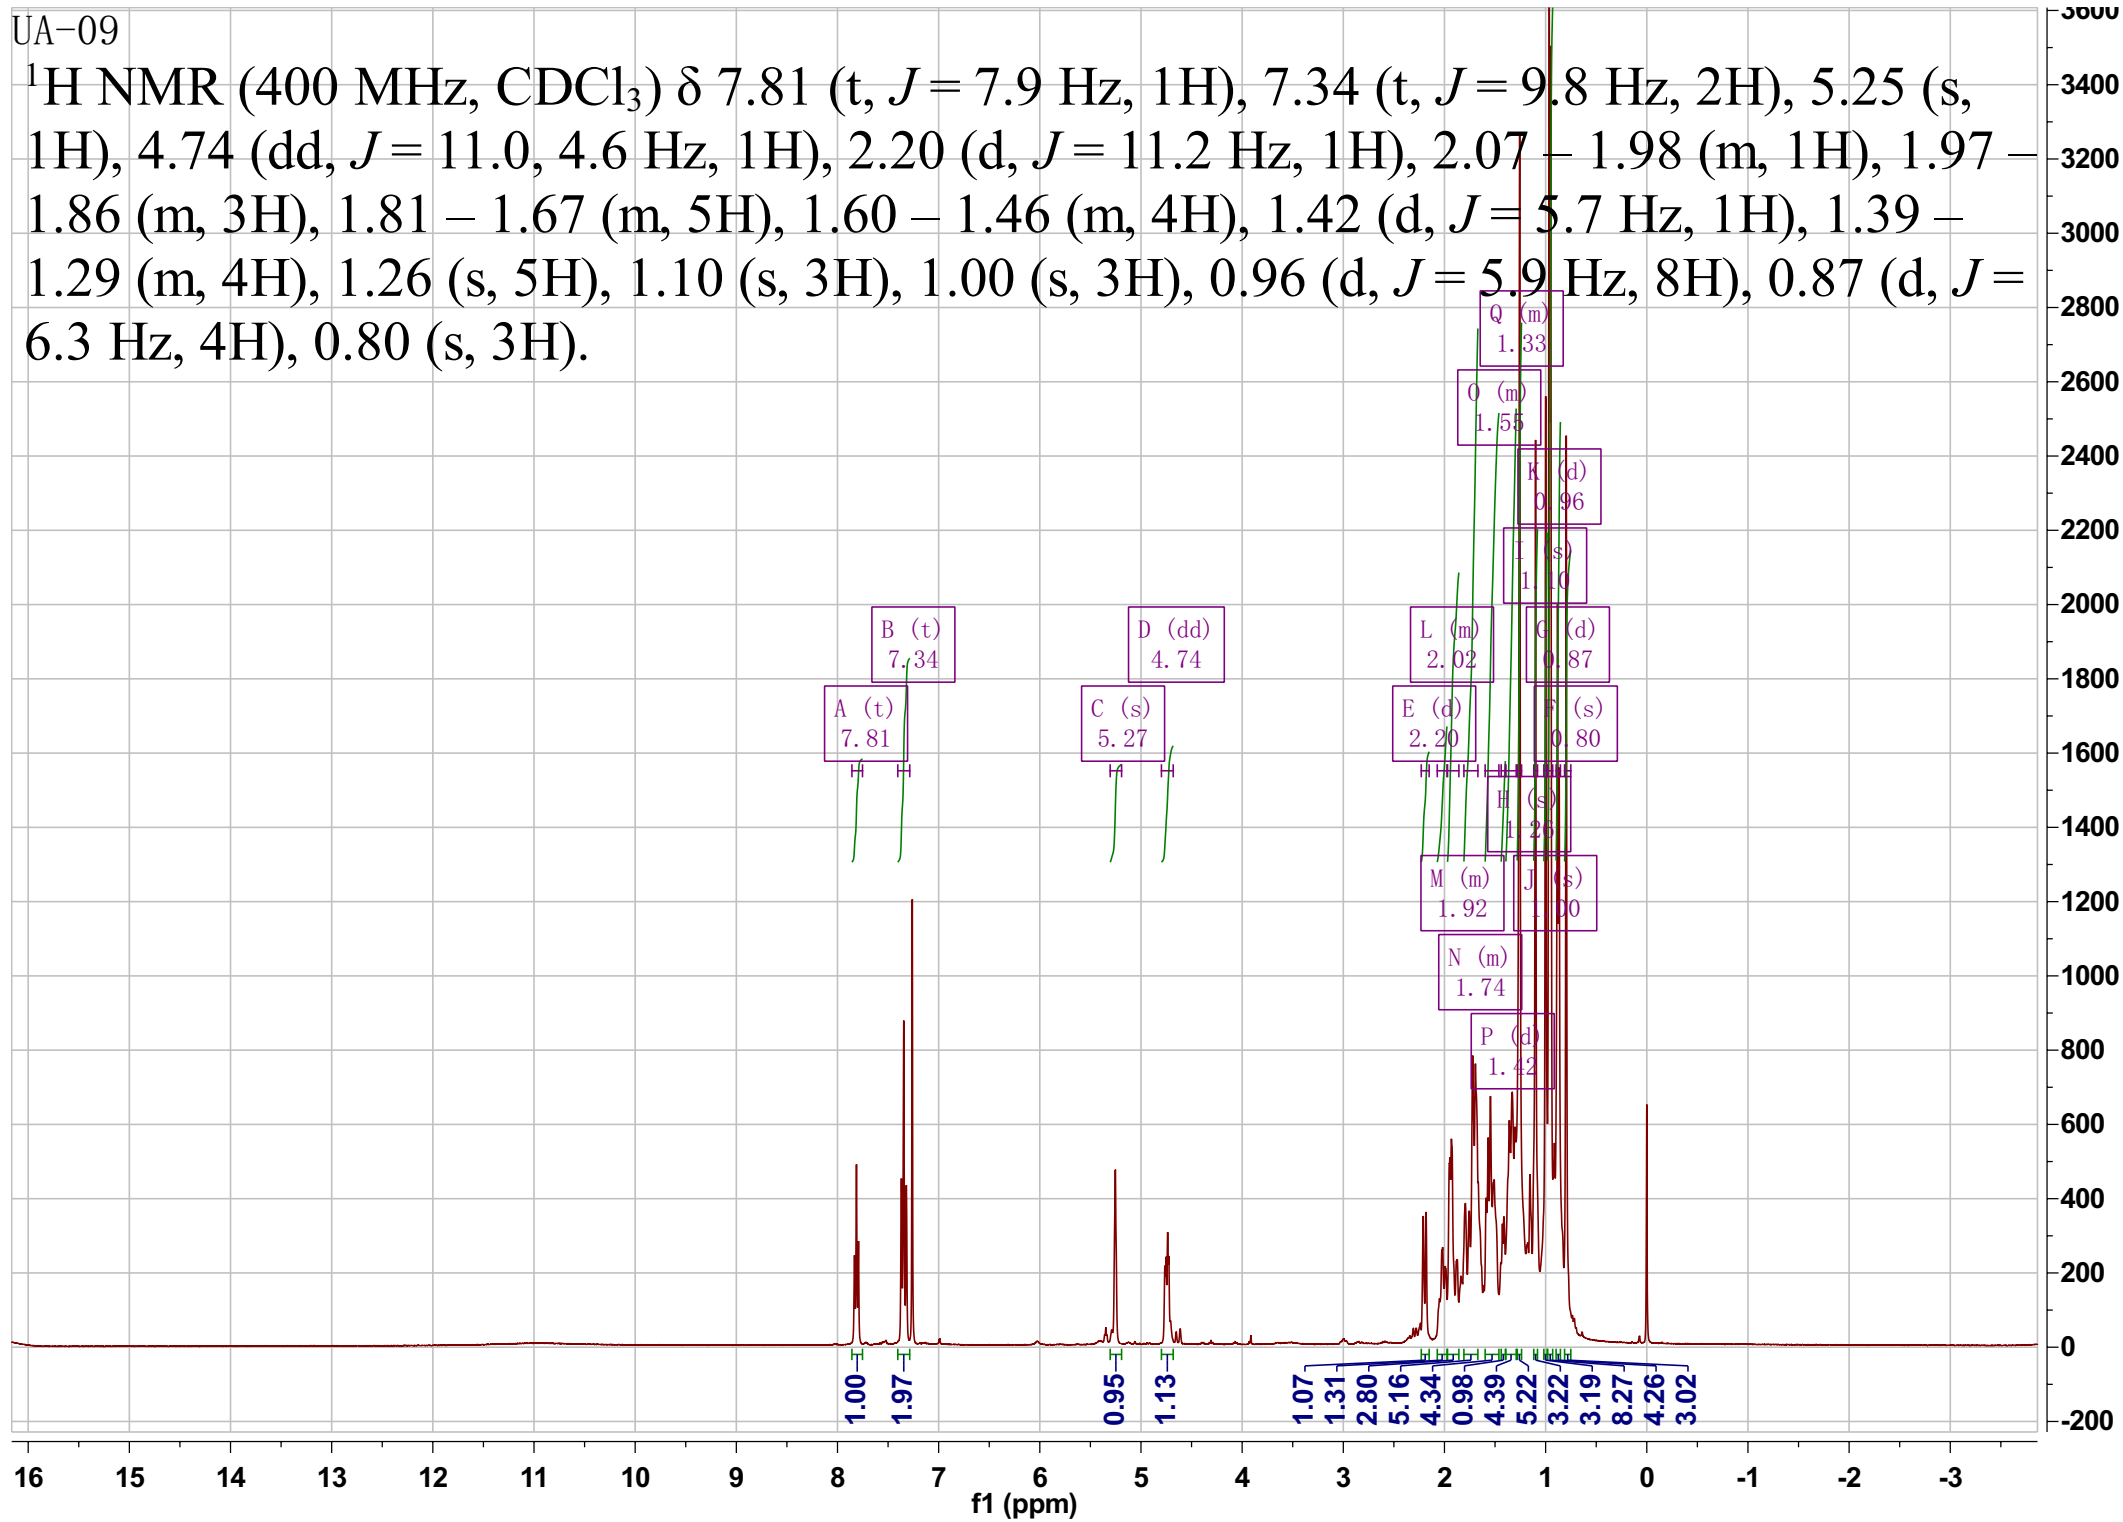

UA-09

$^{13}\text{C}$  NMR (100 MHz,  $\text{CDCl}_3$ )  $\delta$  183.17, 163.79, 163.75, 138.16, 133.30, 127.65, 125.89, 120.95, 120.69, 82.96, 55.52, 52.76, 48.13, 47.67, 42.14, 39.72, 39.21, 39.01, 38.47, 38.11, 37.13, 36.88, 33.05, 30.77, 29.85, 28.32, 28.18, 24.27, 23.78, 23.70, 23.49, 21.32, 18.37, 17.25, 17.17, 17.01, 15.71.

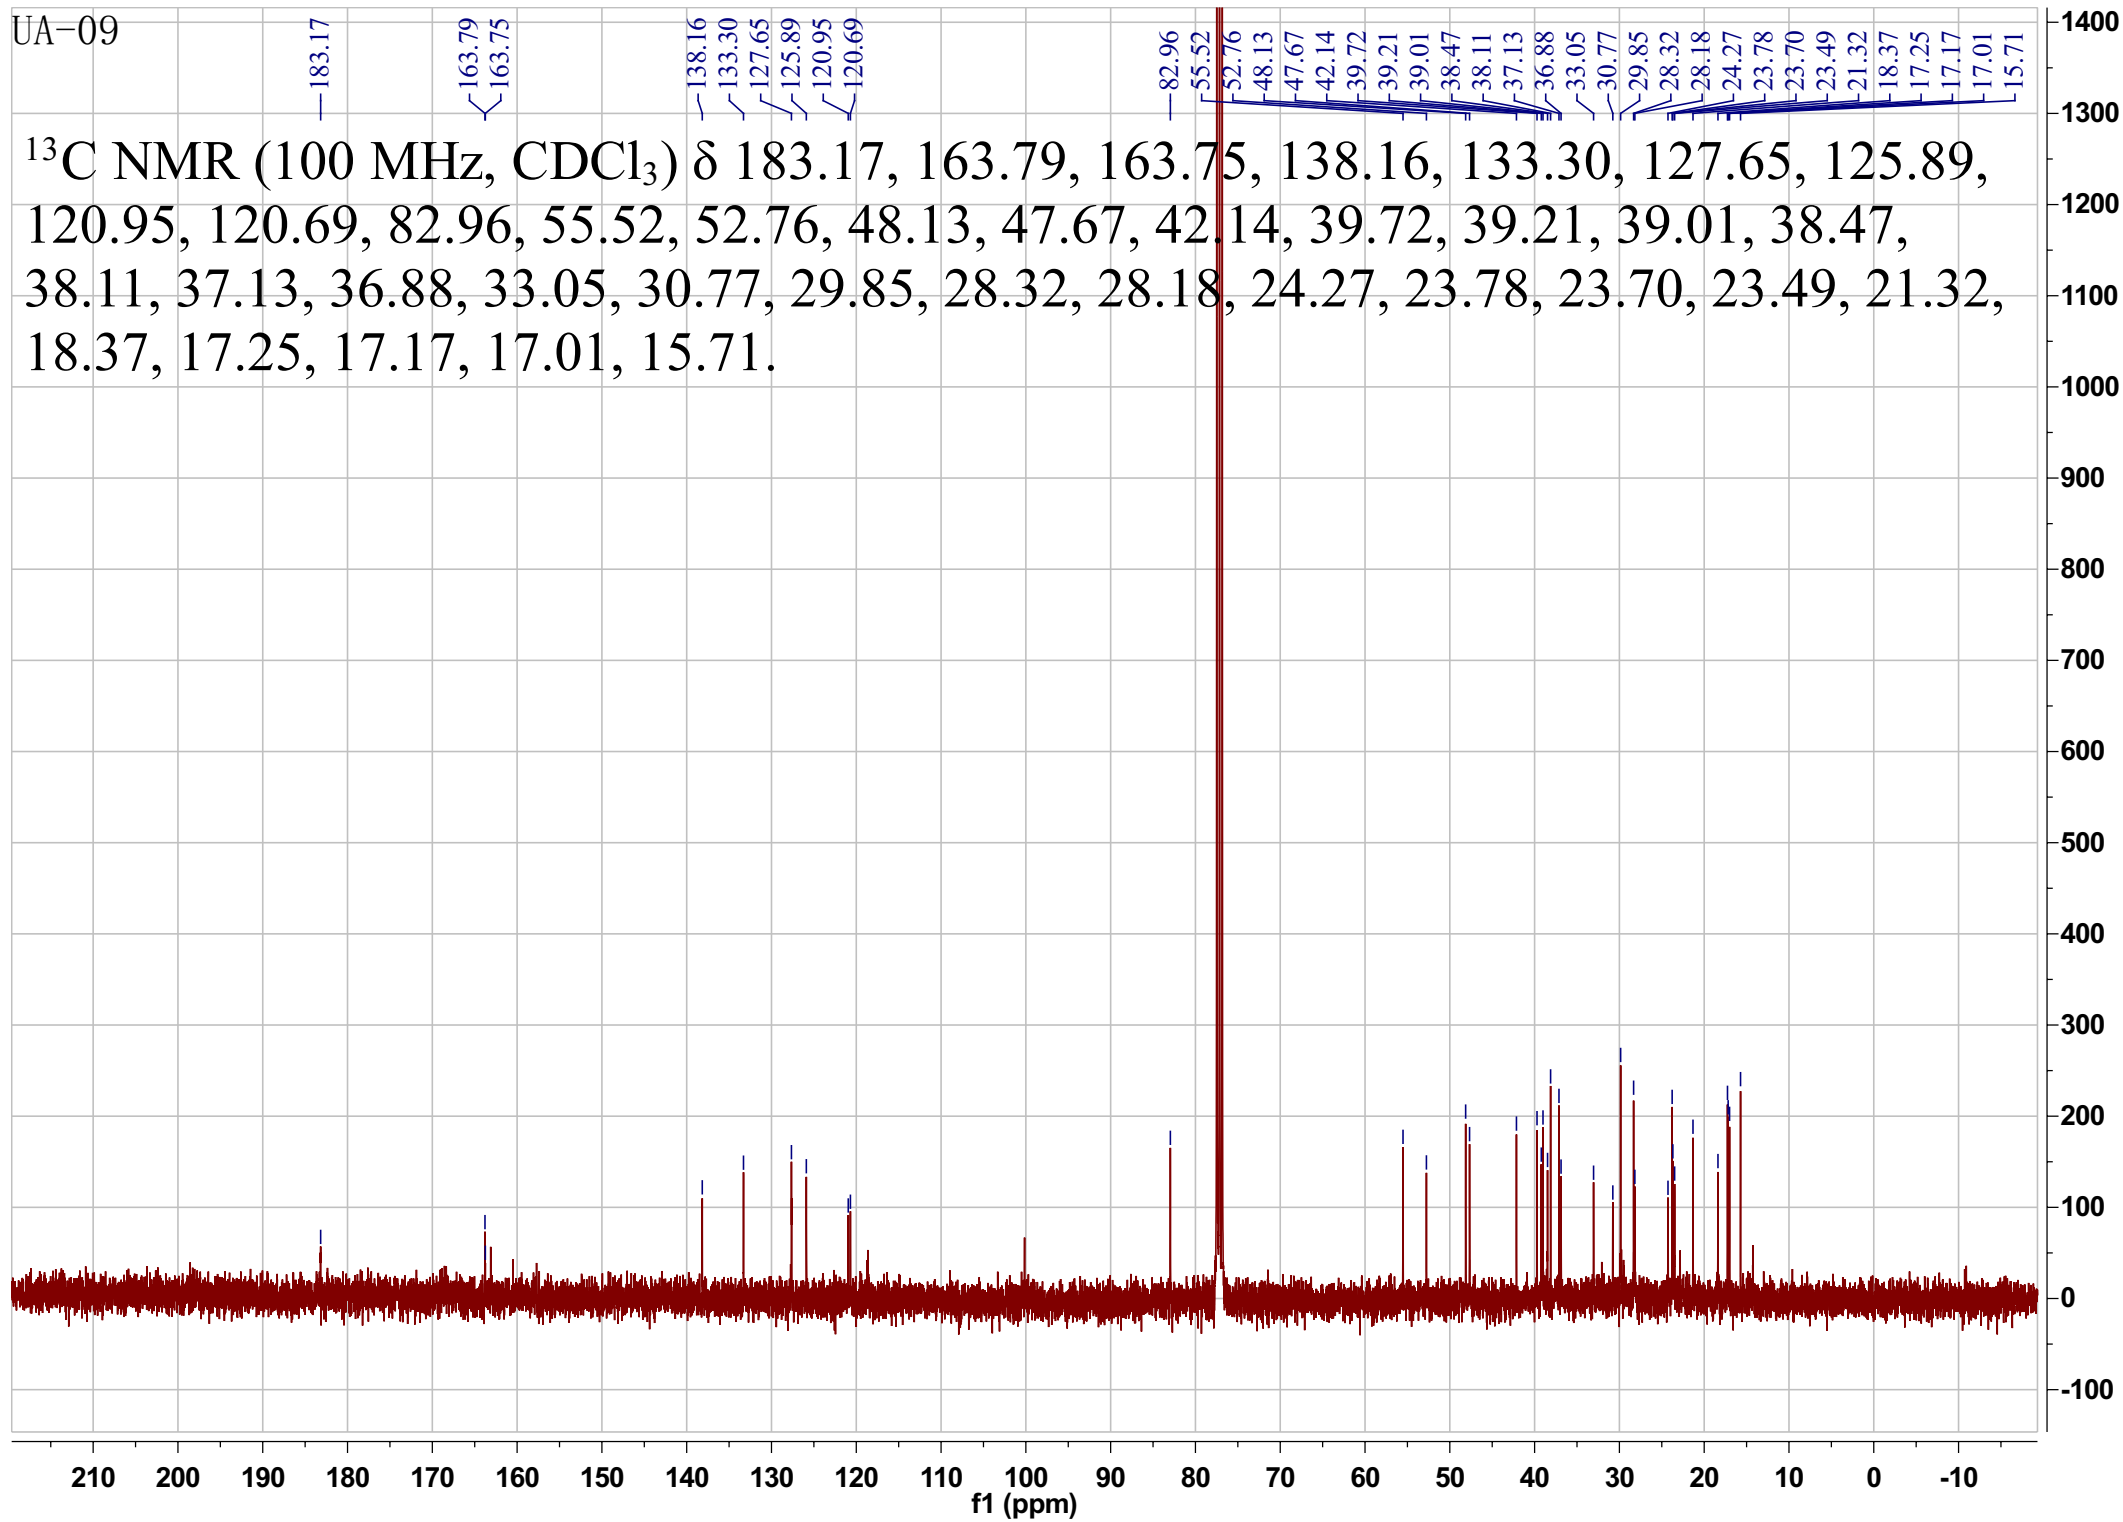

**Compound code: UA-05**

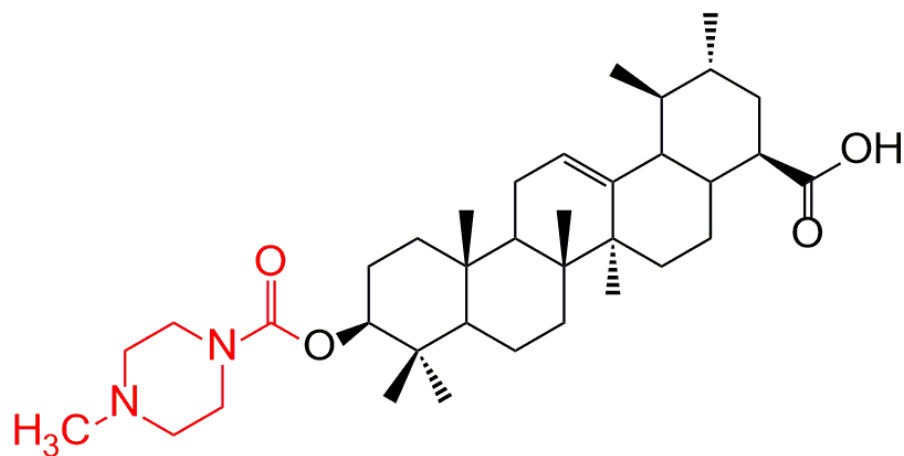

**Figure 5. The structure of compound UA-05.**

UA-06

$^1\text{H}$  NMR (400 MHz,  $\text{CDCl}_3$ )  $\delta$  5.26 (s, 1H), 3.68 – 3.47 (m, 2H), 3.47 – 3.32 (m, 2H), 3.18 (dd,  $J = 10.1, 5.2$  Hz, 1H), 2.49 – 2.31 (m, 4H), 2.28 (s, 3H), 2.18 (d,  $J = 11.2$  Hz, 1H), 2.14 – 1.97 (m, 2H), 1.96 – 1.82 (m, 3H), 1.80 – 1.43 (m, 10H), 1.39 – 1.22 (m, 4H), 1.18 – 1.04 (m, 4H), 0.98 – 0.91 (m, 7H), 0.89 (s, 3H), 0.84 (d,  $J = 6.3$  Hz, 6H), 0.75 (s, 3H).

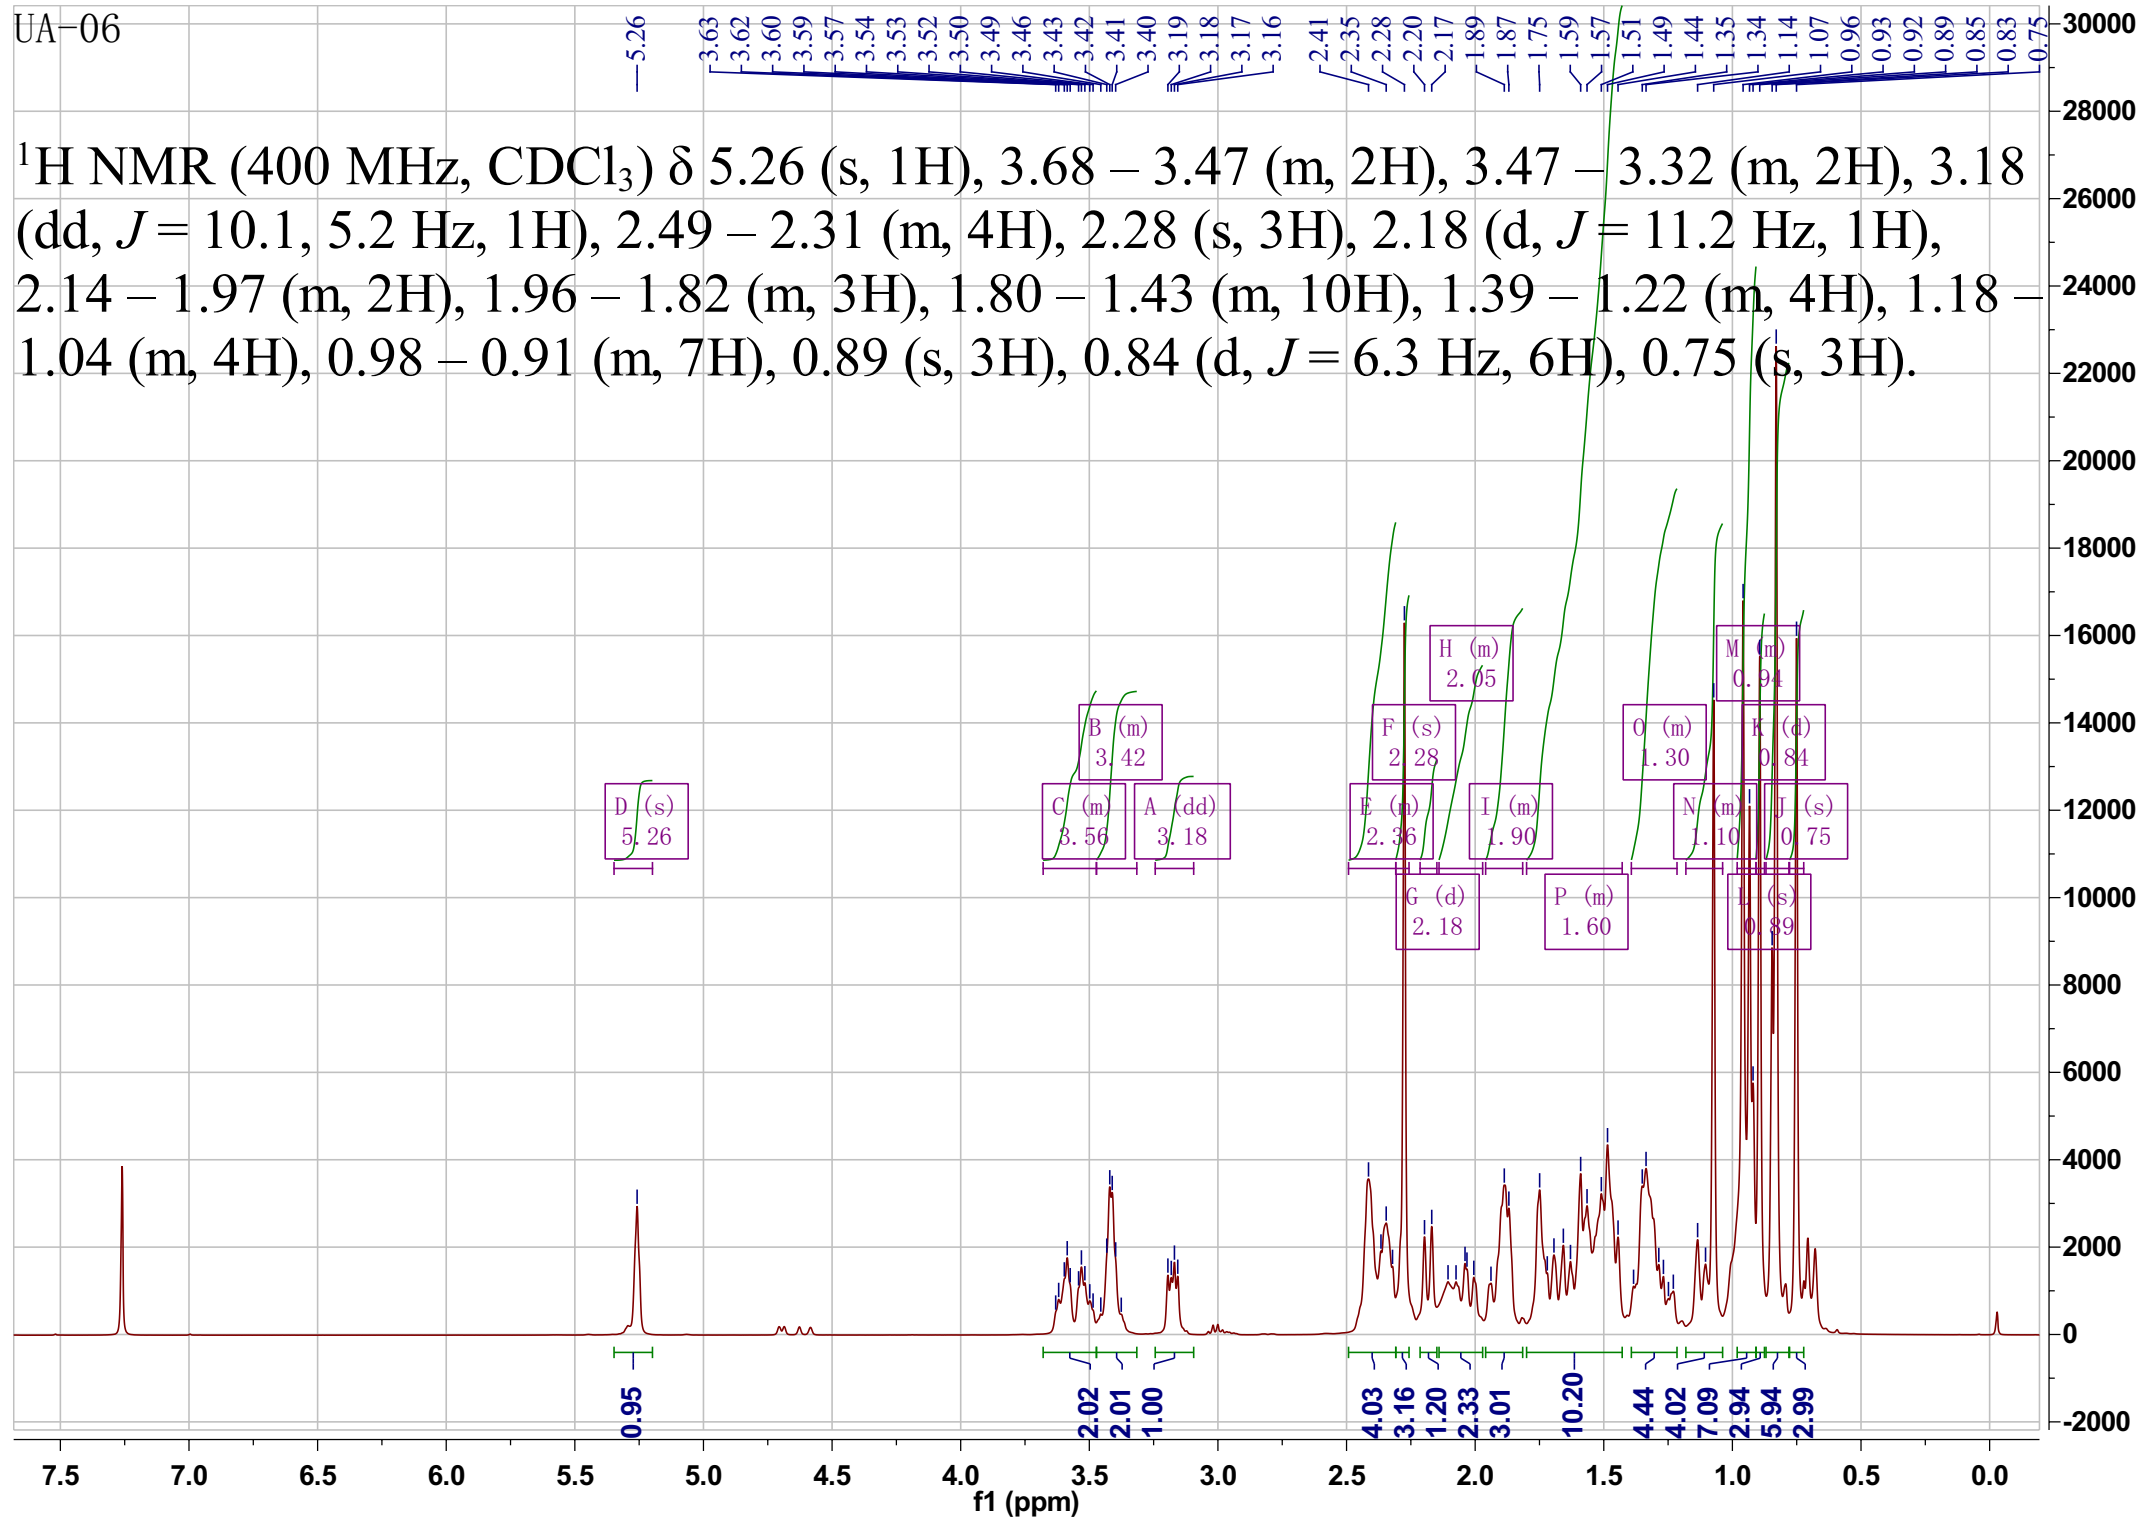

UA-06

$^{13}\text{C}$  NMR (100 MHz,  $\text{CDCl}_3$ )  $\delta$  173.18, 149.58, 137.87, 126.32, 79.02, 55.38, 54.74, 54.29, 52.88, 49.17, 47.68, 46.02, 45.14, 44.17, 42.34, 39.77, 39.23, 38.85, 38.83, 37.06, 36.03, 33.27, 30.62, 28.26, 27.99, 27.34, 24.42, 23.46, 23.44, 21.17, 18.38, 17.45, 16.99, 15.74, 15.59.

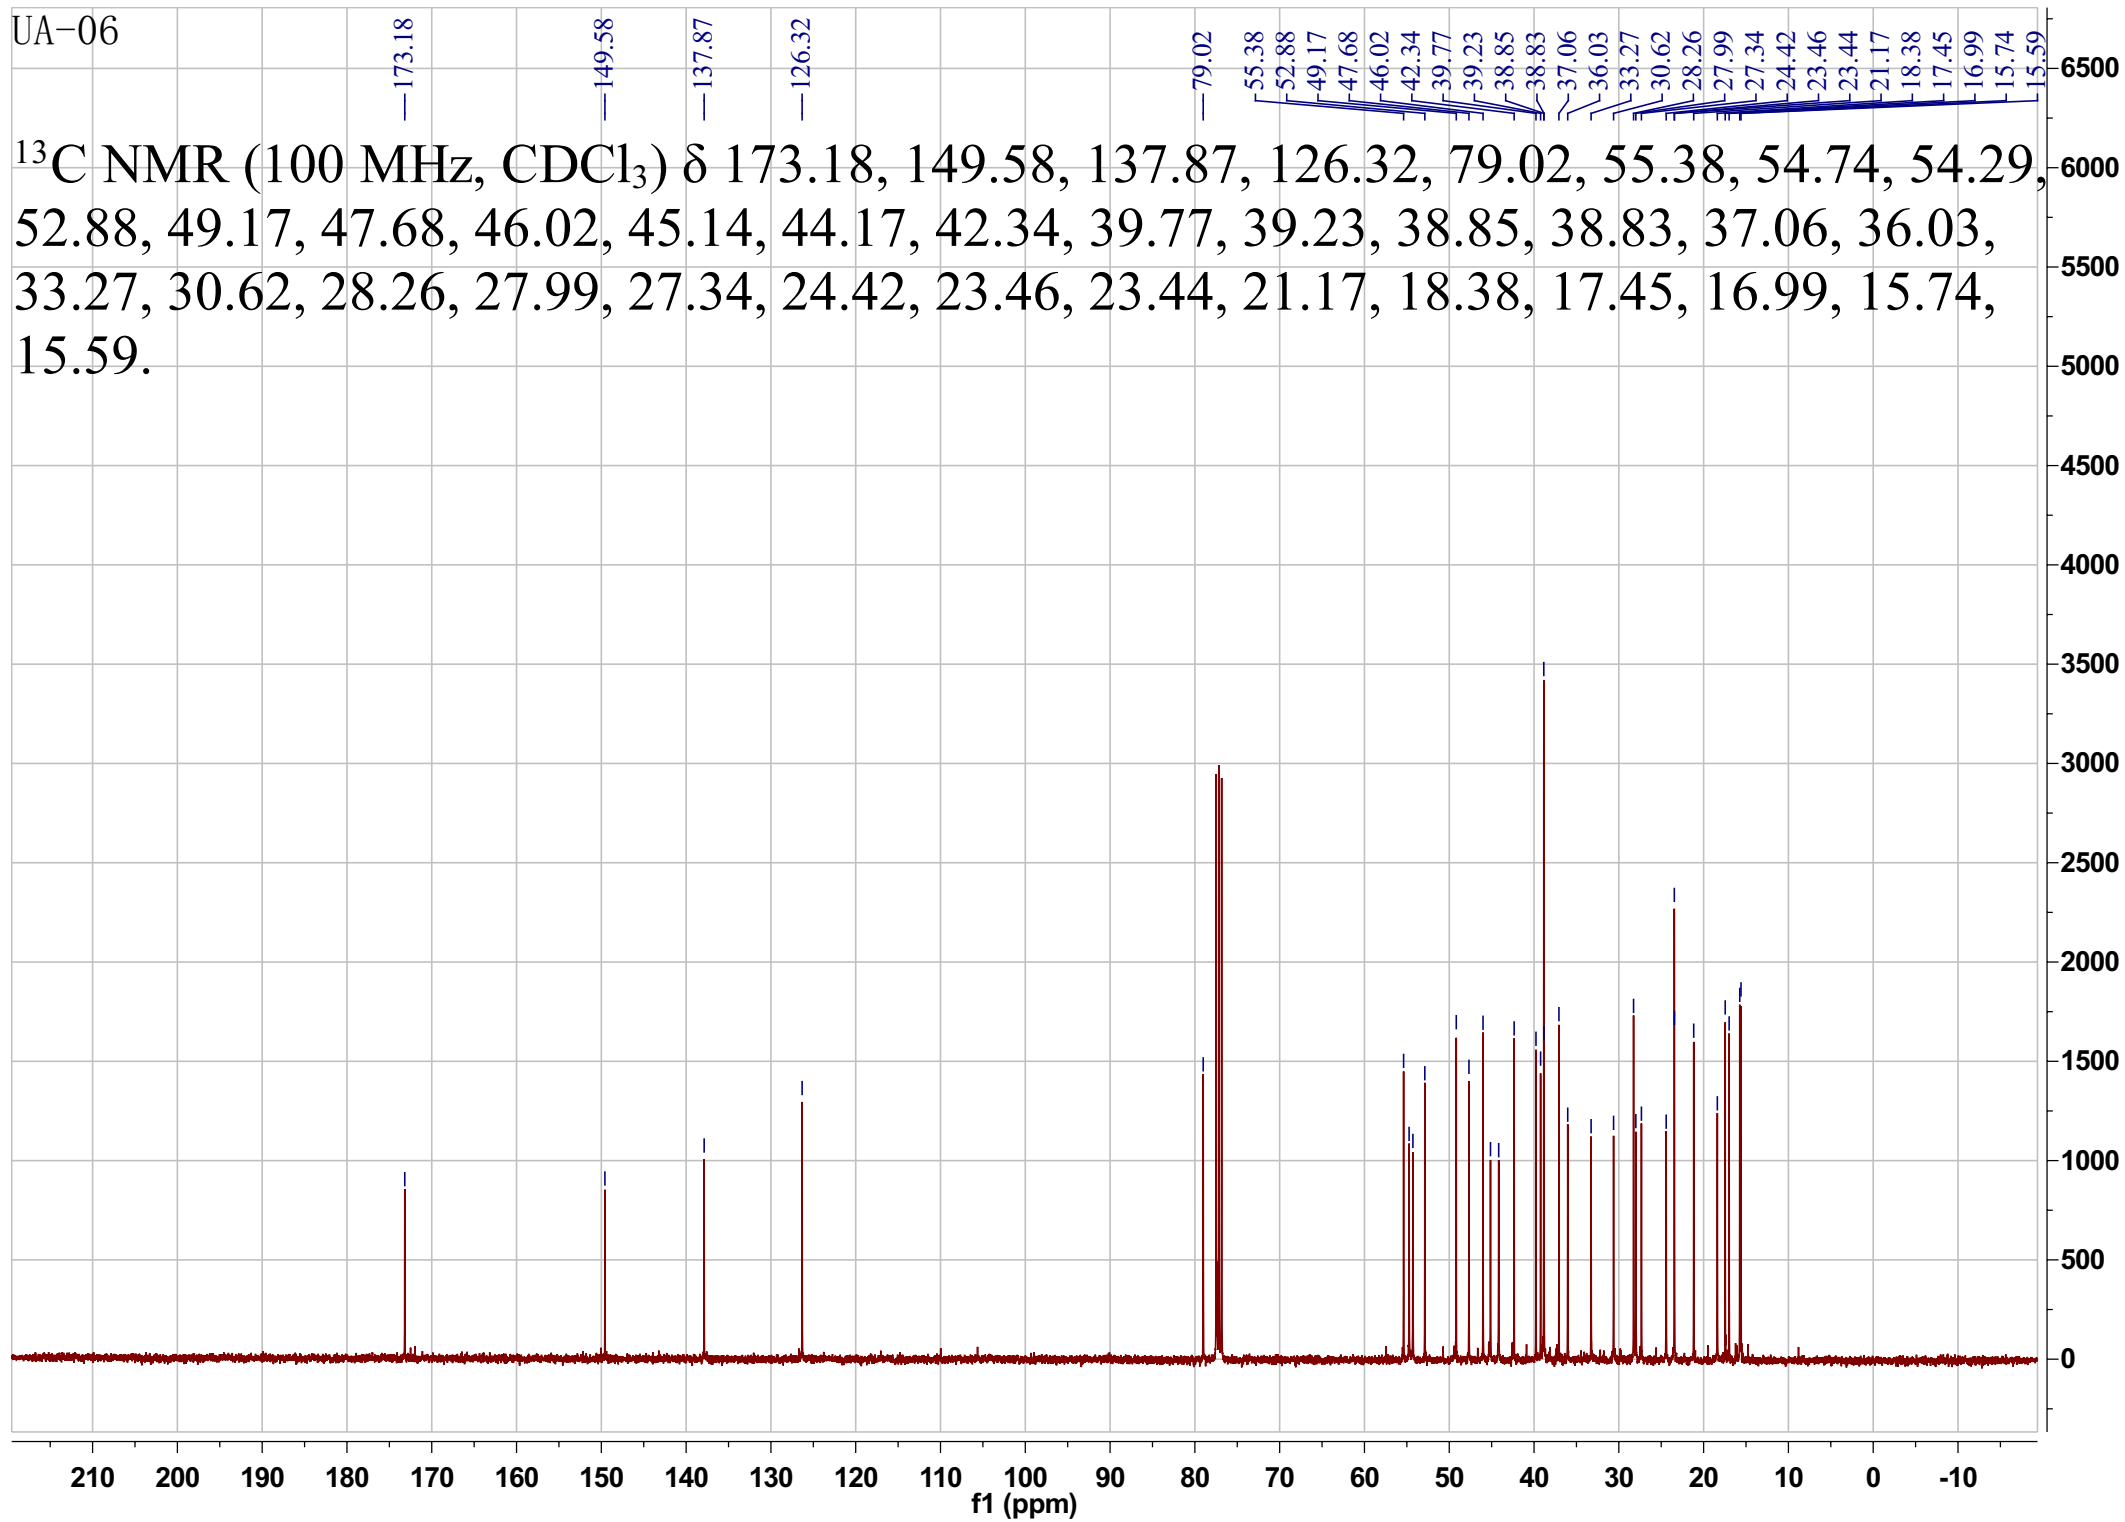



**Compound code: UA-O-a**

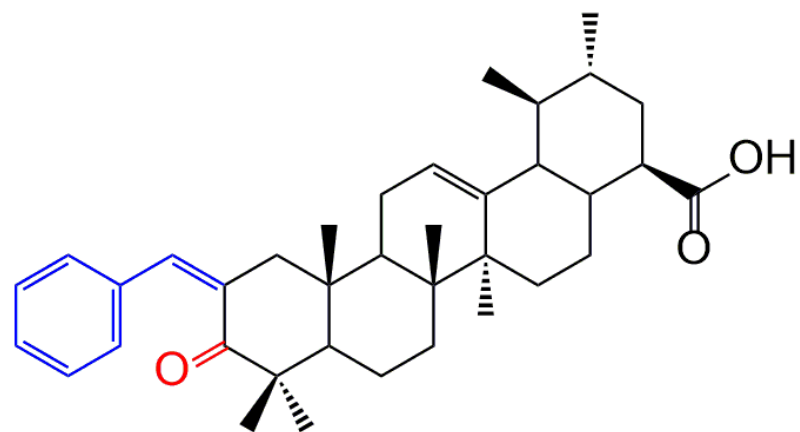

**Figure 6. The structure of compound UA-O-a.**

Uab-02-aa

$^1\text{H}$  NMR (400 MHz,  $\text{CDCl}_3$ )  $\delta$  7.61 (t, 1H), 7.29 (d,  $J = 11.7$  Hz, 1H), 7.23 – 7.13 (m, 4H), 6.88 (dd,  $J = 14.9, 11.9$  Hz, 1H), 5.36 (s, 1H), 2.92 (d,  $J = 24.9$  Hz, 1H), 2.35 (s, 3H), 2.25 (d,  $J = 11.4$  Hz, 1H), 2.19 – 1.95 (m, 4H), 1.88 (t,  $J = 12.0$  Hz, 1H), 1.78 – 1.64 (m, 4H), 1.53 (d,  $J = 13.1$  Hz, 2H), 1.47 – 1.33 (m, 6H), 1.29 – 1.20 (m, 3H), 1.12 (t, 9H), 0.98 – 0.89 (m, 9H), 0.86 (s, 3H).

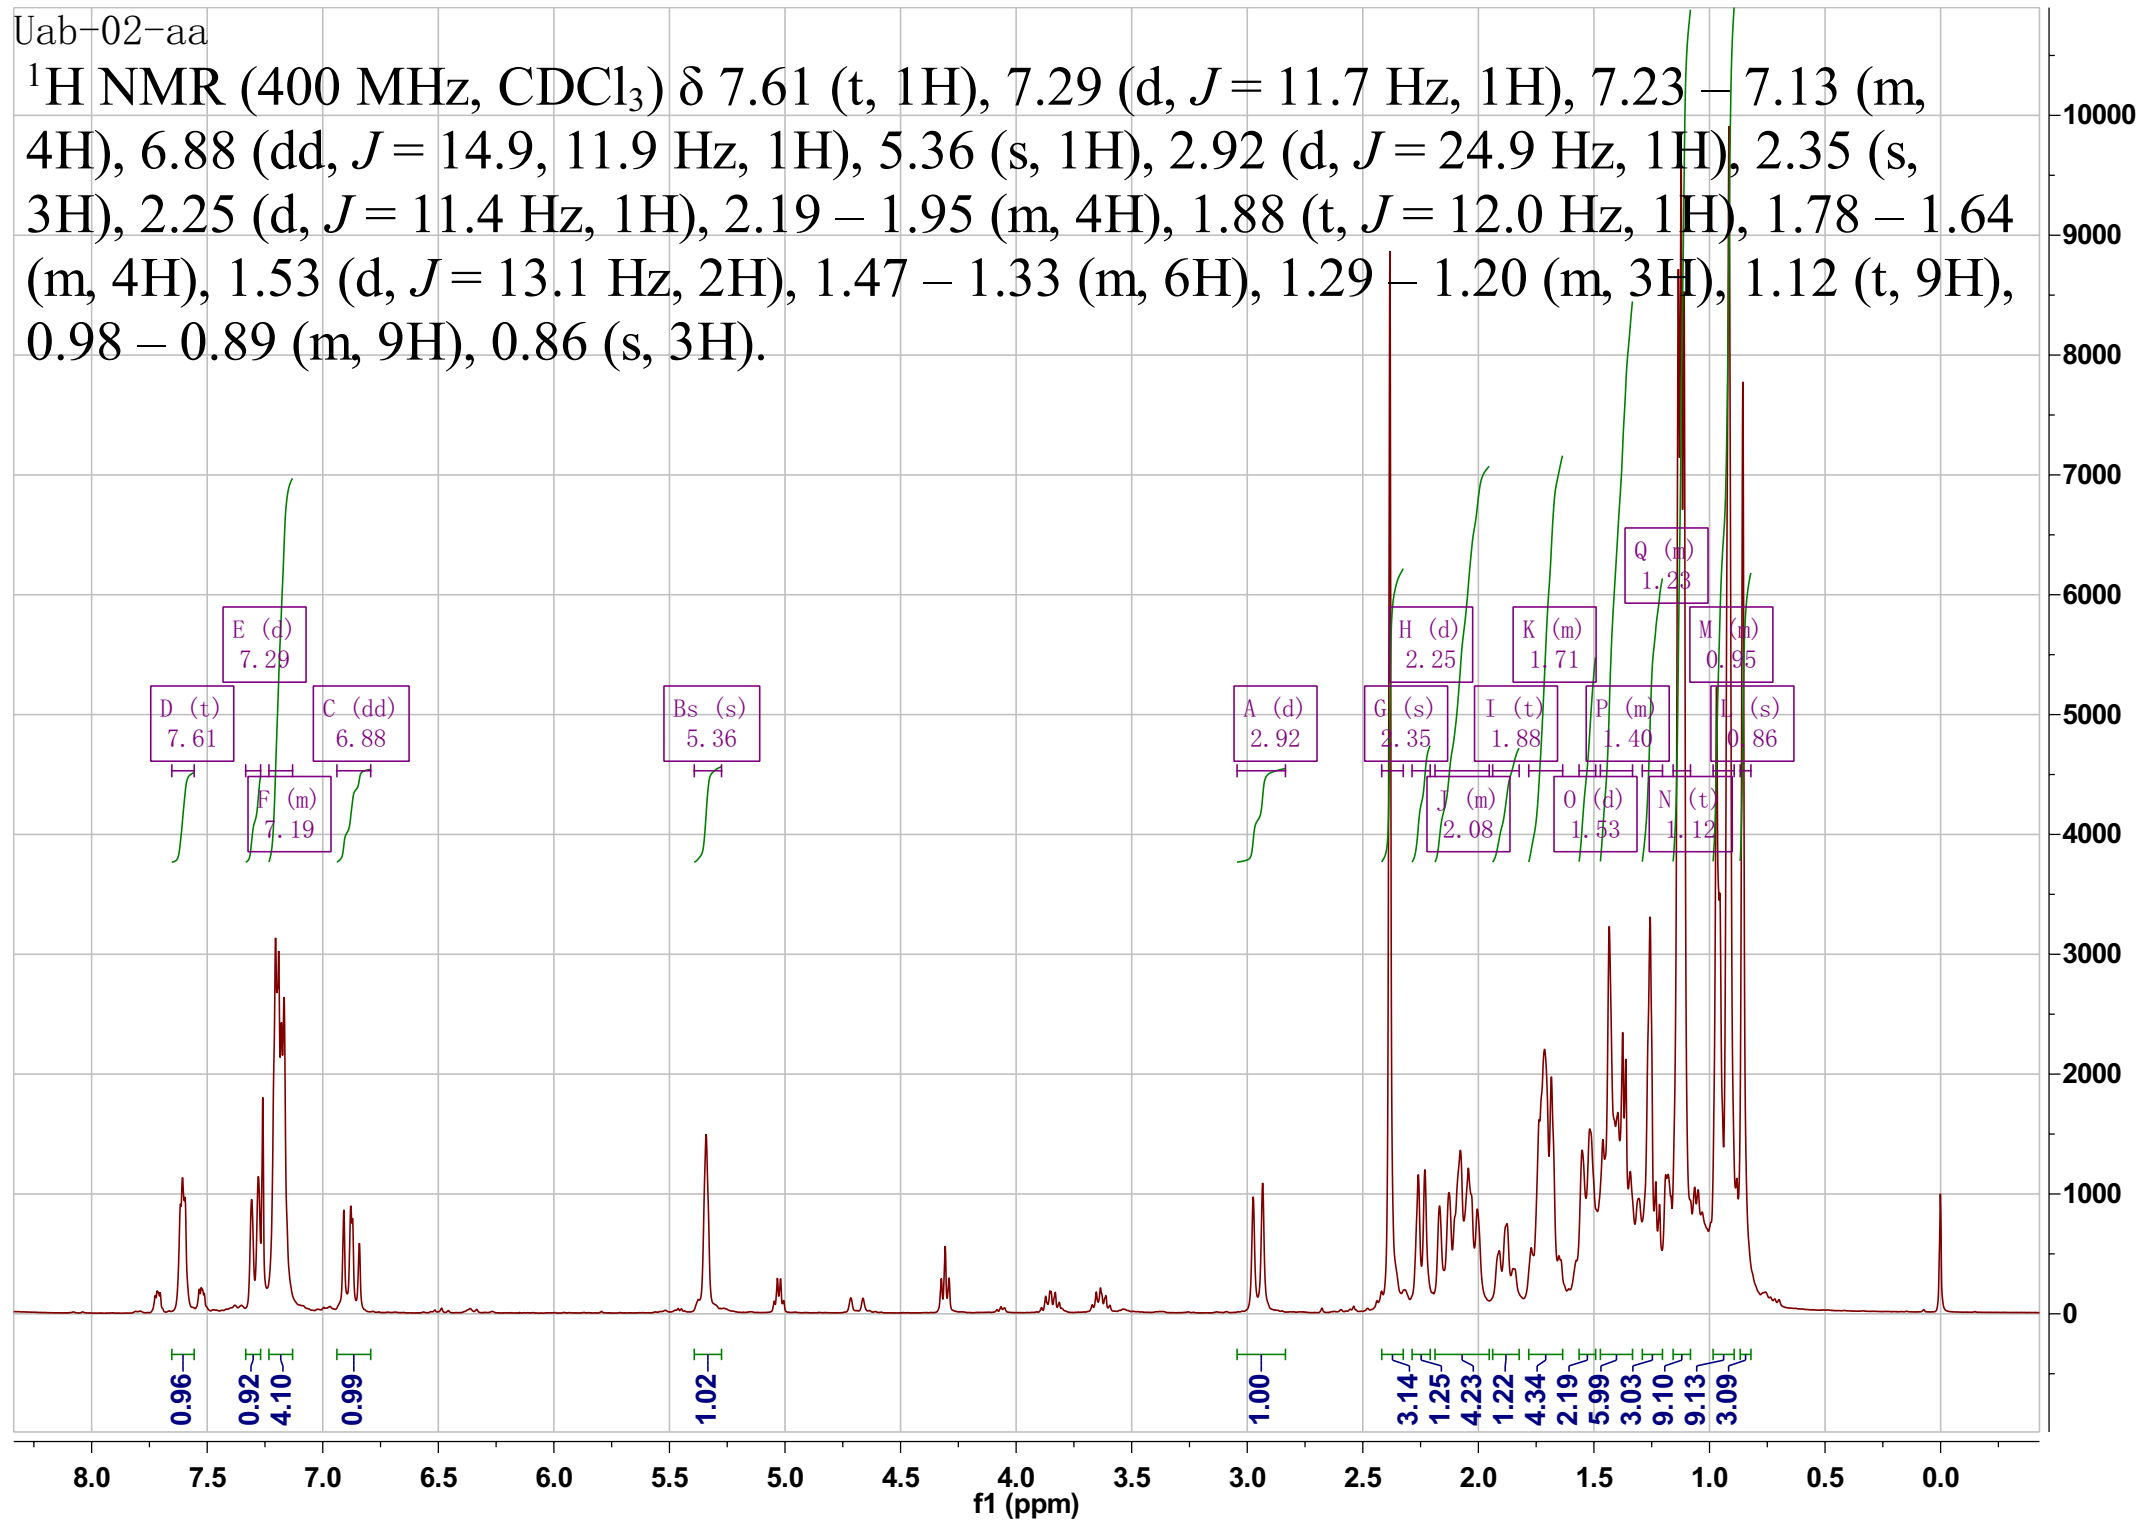

Uab-02-aa

$^{13}\text{C}$  NMR (100 MHz,  $\text{CDCl}_3$ )  $\delta$  207.32, 183.58, 138.49, 138.28, 137.71, 136.63, 135.78, 132.79, 130.80, 128.79, 126.33, 125.79, 125.72, 124.59, 53.37, 52.96, 48.29, 45.38, 45.25, 42.71, 42.42, 39.58, 39.30, 39.00, 36.85, 36.22, 32.38, 30.81, 29.70, 28.17, 24.30, 23.80, 23.58, 22.80, 21.28, 20.41, 19.88, 17.18, 16.98, 15.69.

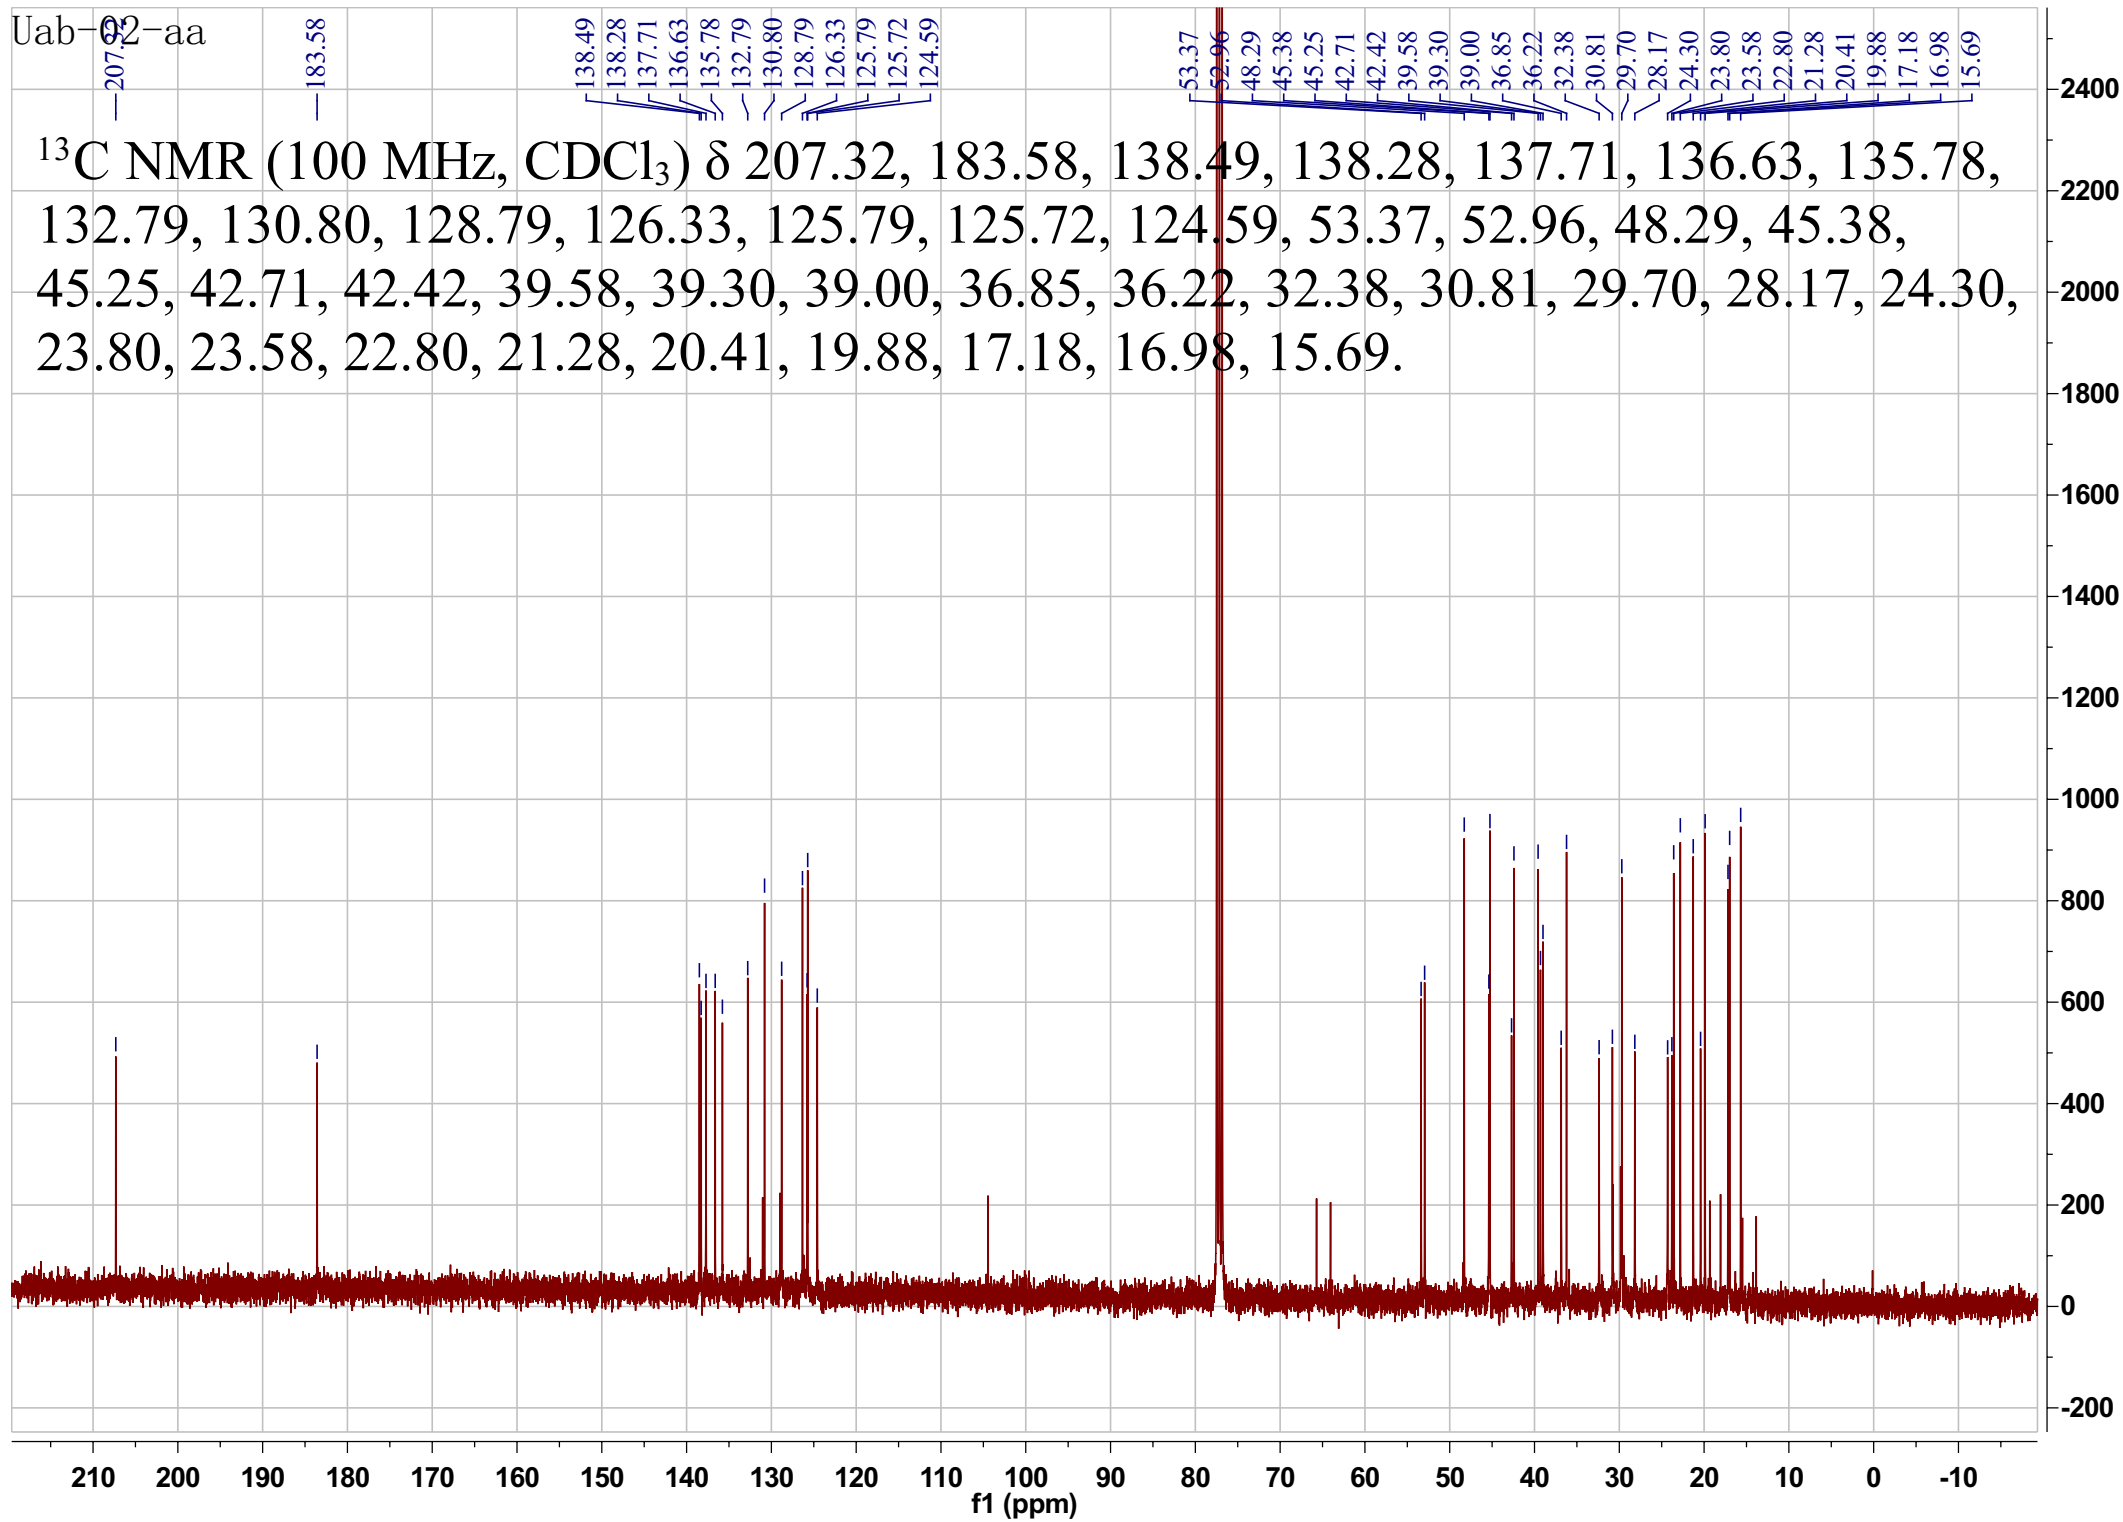

**Compound code: UA-O-b**

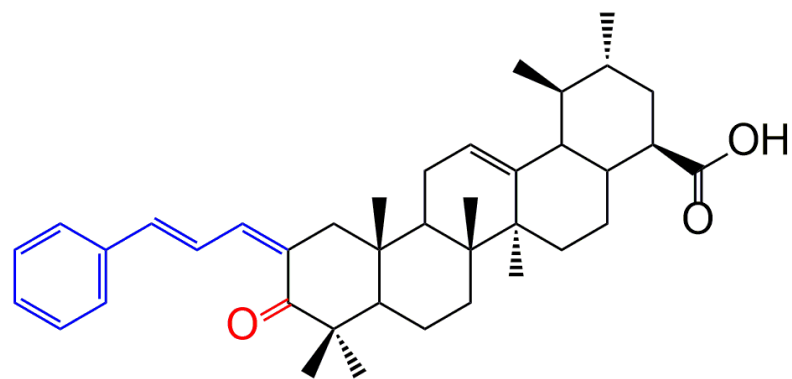

**Figure 7. The structure of compound UA-O-b.**

UA 02 17  
 7.68 7.30 7.28 7.26 7.24 7.22 7.20 6.97 6.94 6.93 6.90

$^1\text{H}$  NMR (400 MHz,  $\text{CDCl}_3$ )  $\delta$  7.68 (d,  $J = 7.5$  Hz, 1H), 7.50 – 7.05 (m, 6H), 6.94 (dd,  $J = 15.1, 11.9$  Hz, 1H), 5.34 (s, 1H), 2.95 (d,  $J = 16.4$  Hz, 1H), 2.24 (d,  $J = 11.3$  Hz, 1H), 2.16 (d,  $J = 16.9$  Hz, 1H), 2.11 – 1.96 (m, 3H), 1.88 (t,  $J = 11.8$  Hz, 1H), 1.79 – 1.62 (m, 4H), 1.53 (d,  $J = 14.4$  Hz, 2H), 1.47 – 1.30 (m, 6H), 1.28 – 1.21 (m, 2H), 1.16 – 1.08 (m, 9H), 1.00 – 0.88 (m, 9H), 0.85 (s, 3H).

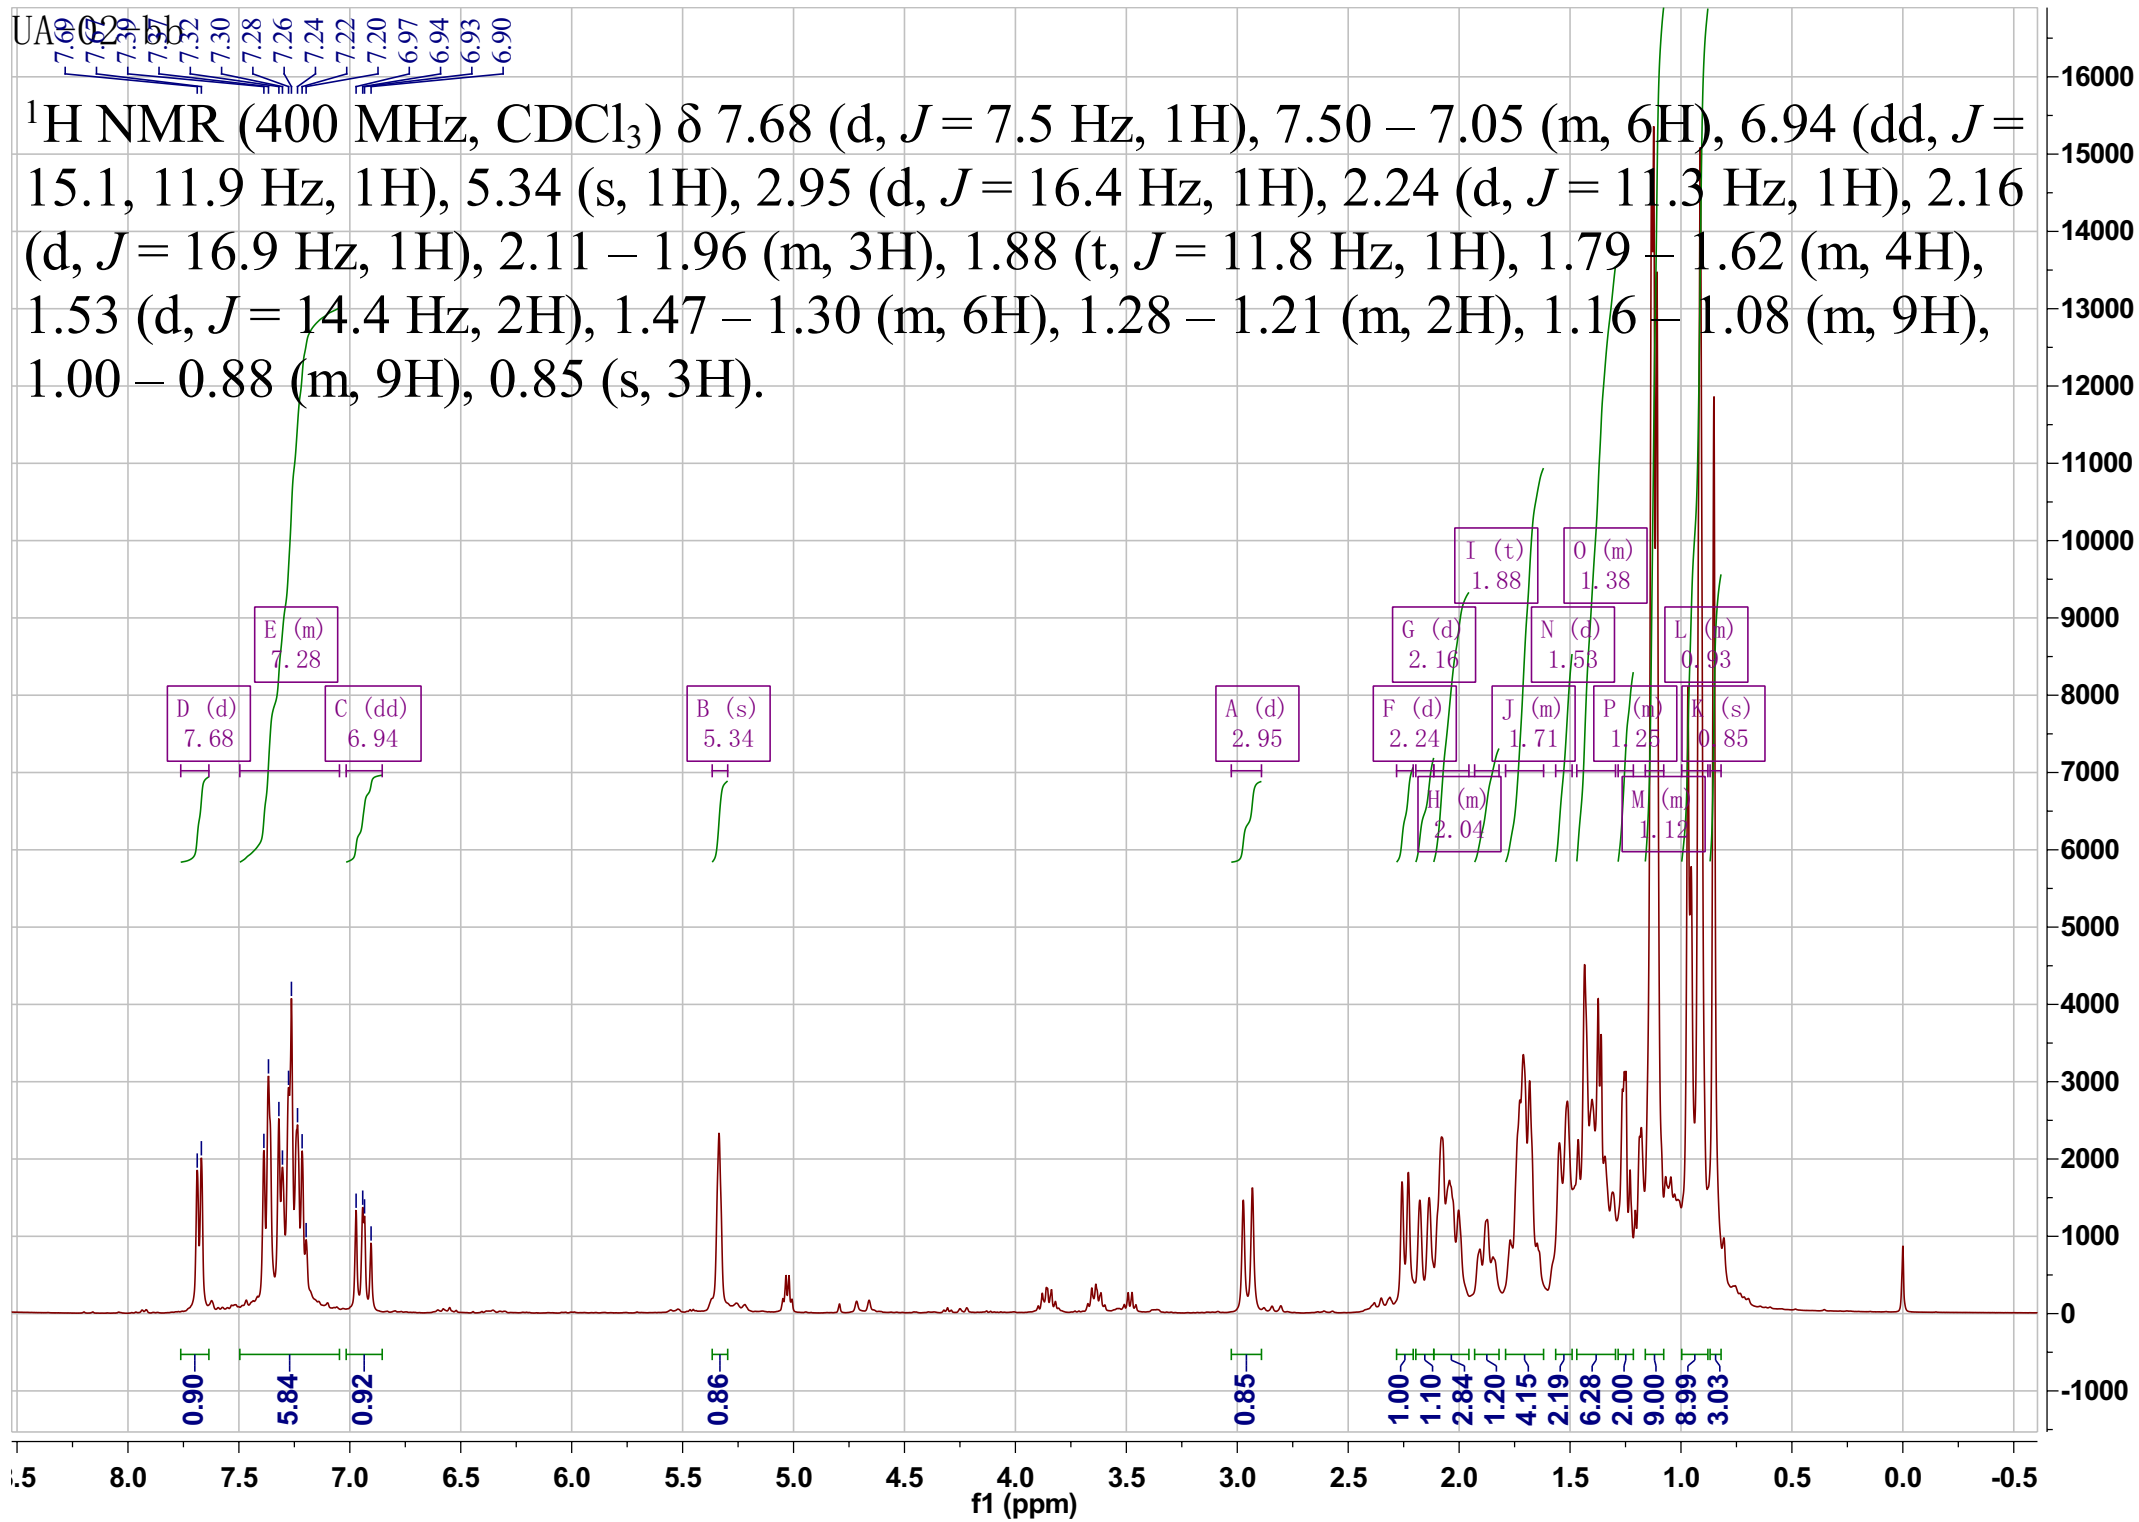

UA-02-bb

$^{13}\text{C}$  NMR (100 MHz,  $\text{CDCl}_3$ )  $\delta$  207.26, 183.82, 138.34, 136.96, 136.27, 134.92, 134.08, 133.97, 130.18, 129.65, 127.01, 125.83, 125.69, 53.36, 52.93, 48.28, 45.36, 45.30, 42.75, 42.41, 39.57, 39.27, 38.99, 36.84, 36.24, 32.34, 30.80, 29.67, 28.15, 24.27, 23.80, 23.58, 22.77, 21.27, 20.39, 17.17, 16.95, 15.70.

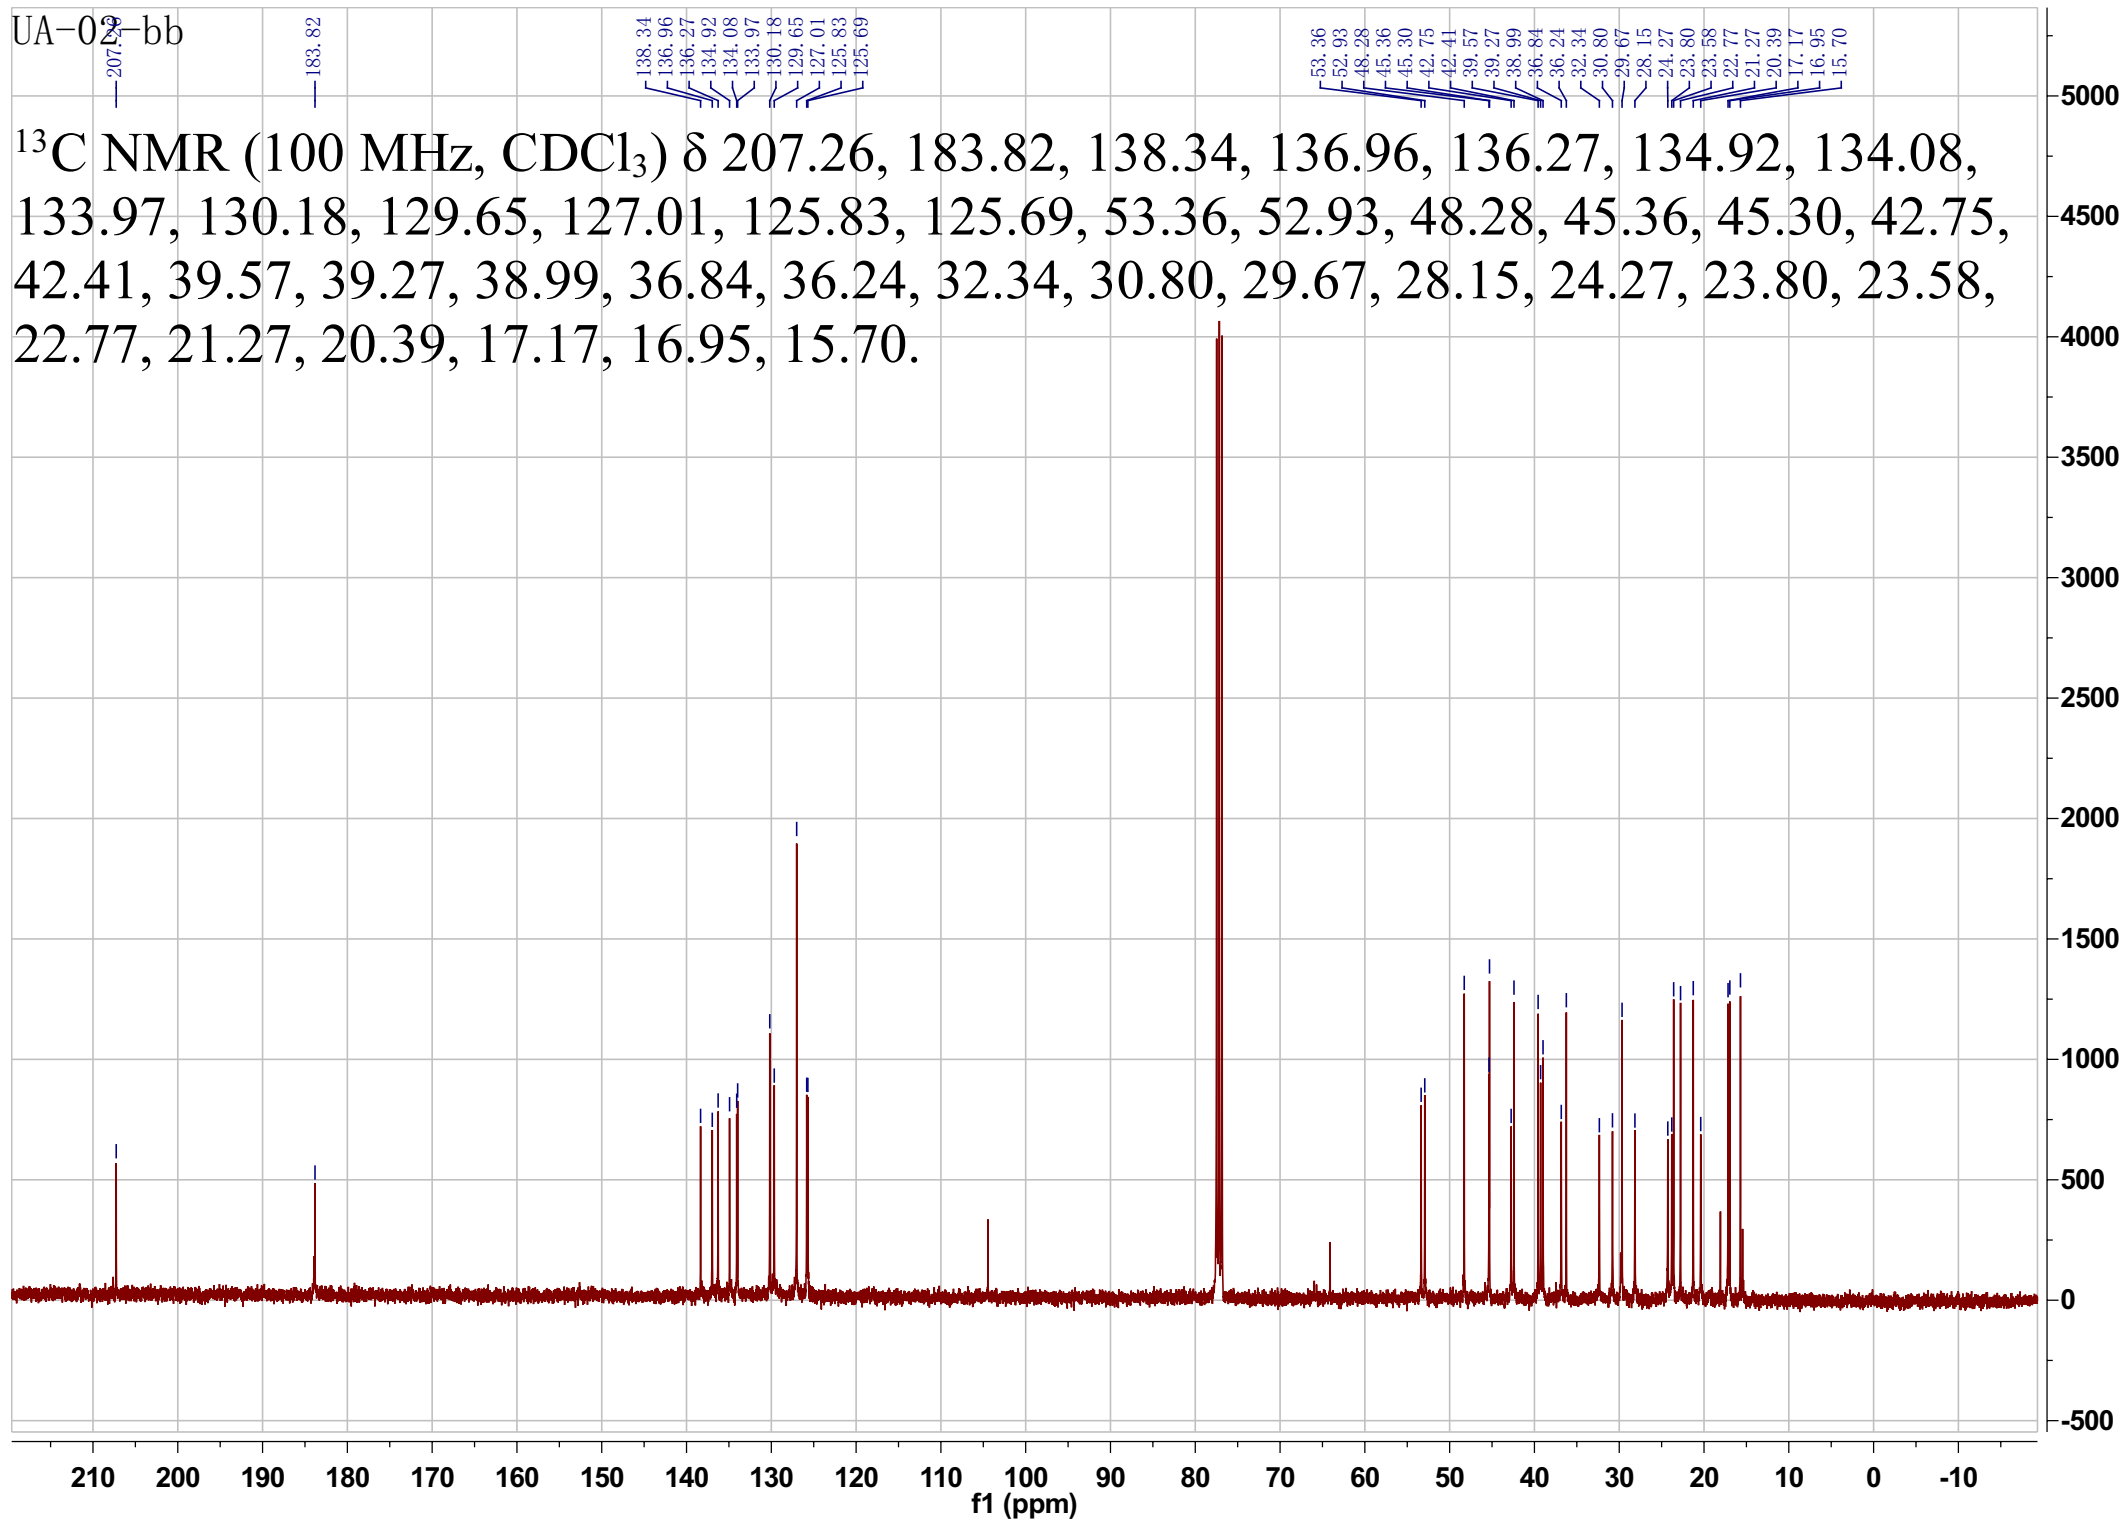

Compound code: UA-O-c

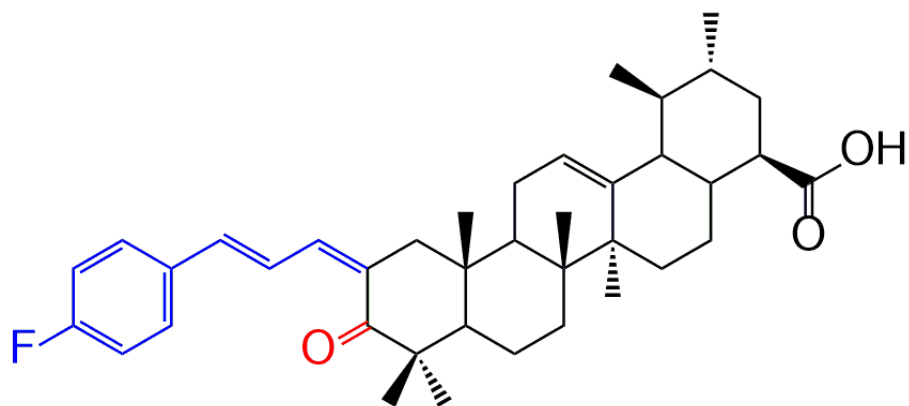

Figure 8. The structure of compound UA-O-c.

UA-02-dd

$^1\text{H}$  NMR (400 MHz,  $\text{CDCl}_3$ )  $\delta$  7.47 (dt,  $J = 14.5, 7.3$  Hz, 2H), 7.22 (t,  $J = 10.9, 5.2$  Hz, 1H), 7.04 (t,  $J = 8.6$  Hz, 2H), 6.90 – 6.84 (m, 2H), 5.33 (t,  $J = 14.7$  Hz, 1H), 2.91 (d,  $J = 17.9$  Hz, 1H), 2.25 (d,  $J = 11.1$  Hz, 1H), 2.14 (d,  $J = 15.5$  Hz, 1H), 2.11 – 1.99 (m, 3H), 1.92 – 1.83 (m, 1H), 1.75 – 1.66 (m, 4H), 1.53 (d,  $J = 12.5$  Hz, 2H), 1.45 – 1.36 (m, 5H), 1.29 – 1.23 (m, 3H), 1.14 – 1.09 (m, 10H), 0.97 (d,  $J = 6.2$  Hz, 3H), 0.92 (d,  $J = 8.9$  Hz, 6H), 0.85 (s, 3H).

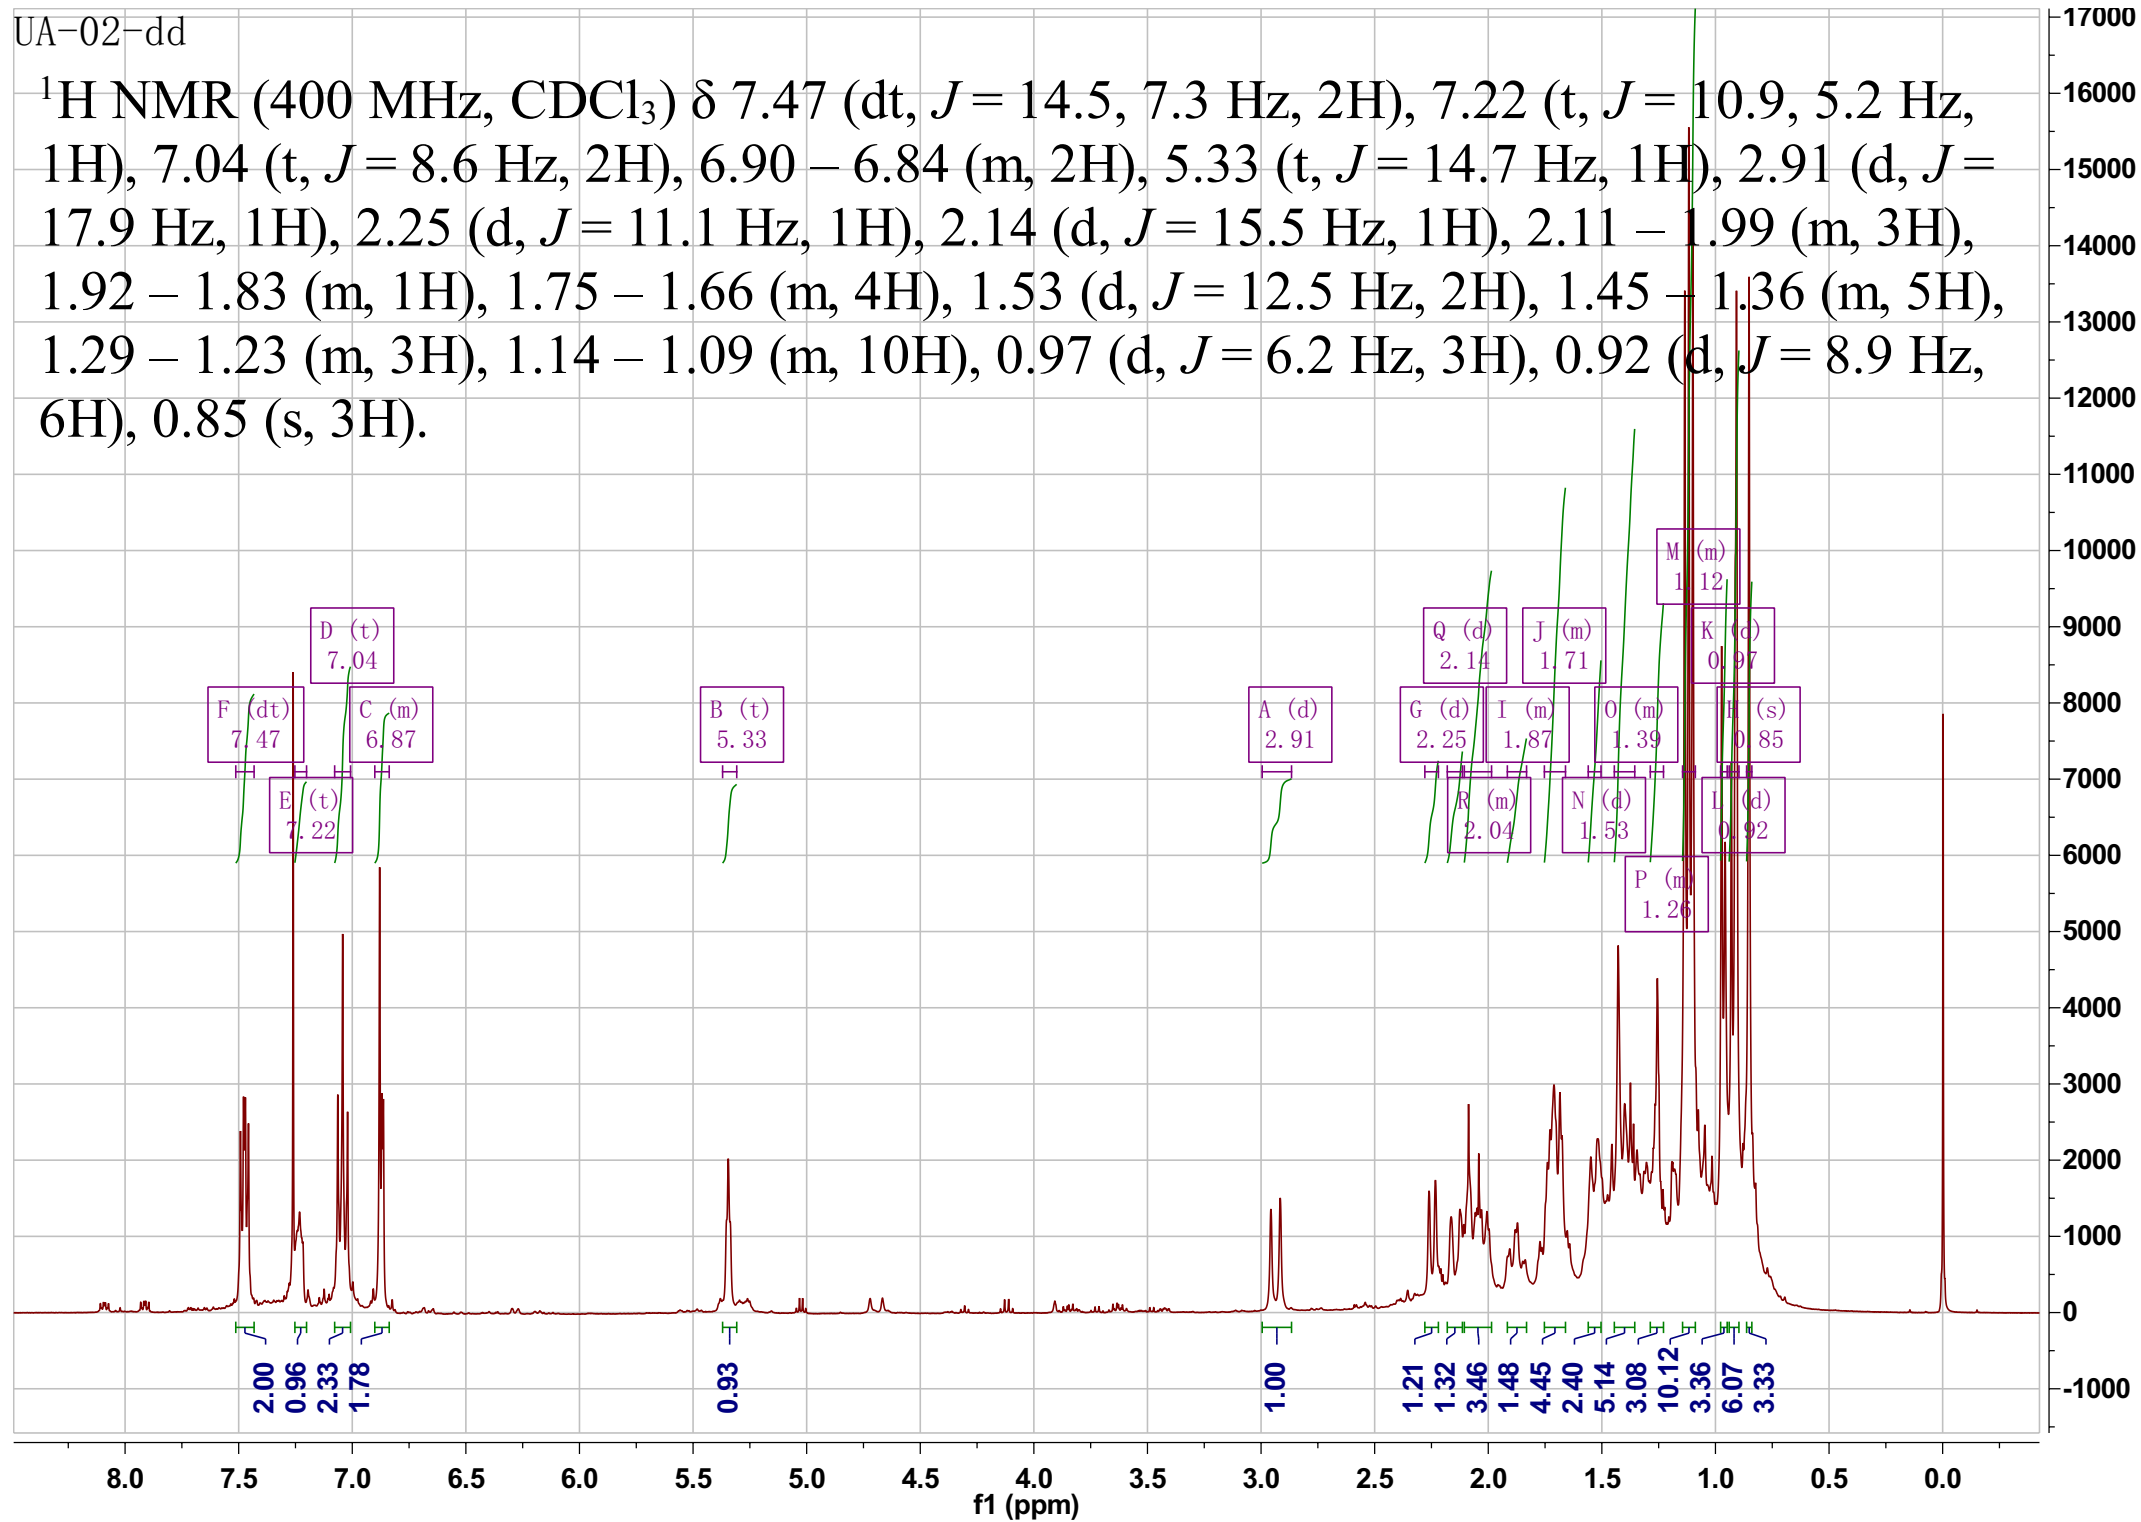



UA-08-dd

$^{13}\text{C}$  NMR (100 MHz,  $\text{CDCl}_3$ )  $\delta$  207.28, 183.62, 163.1, 139.44, 138.33, 137.22, 133.10, 132.93, 129.00, 128.92, 125.72, 123.31, 116.07, 115.85, 53.30, 52.95, 48.28, 45.33, 45.22, 42.69, 42.42, 39.55, 39.27, 38.98, 36.83, 36.18, 32.35, 30.79, 29.72, 28.14, 24.27, 23.81, 23.58, 22.78, 21.28, 20.40, 17.17, 16.95, 15.69.

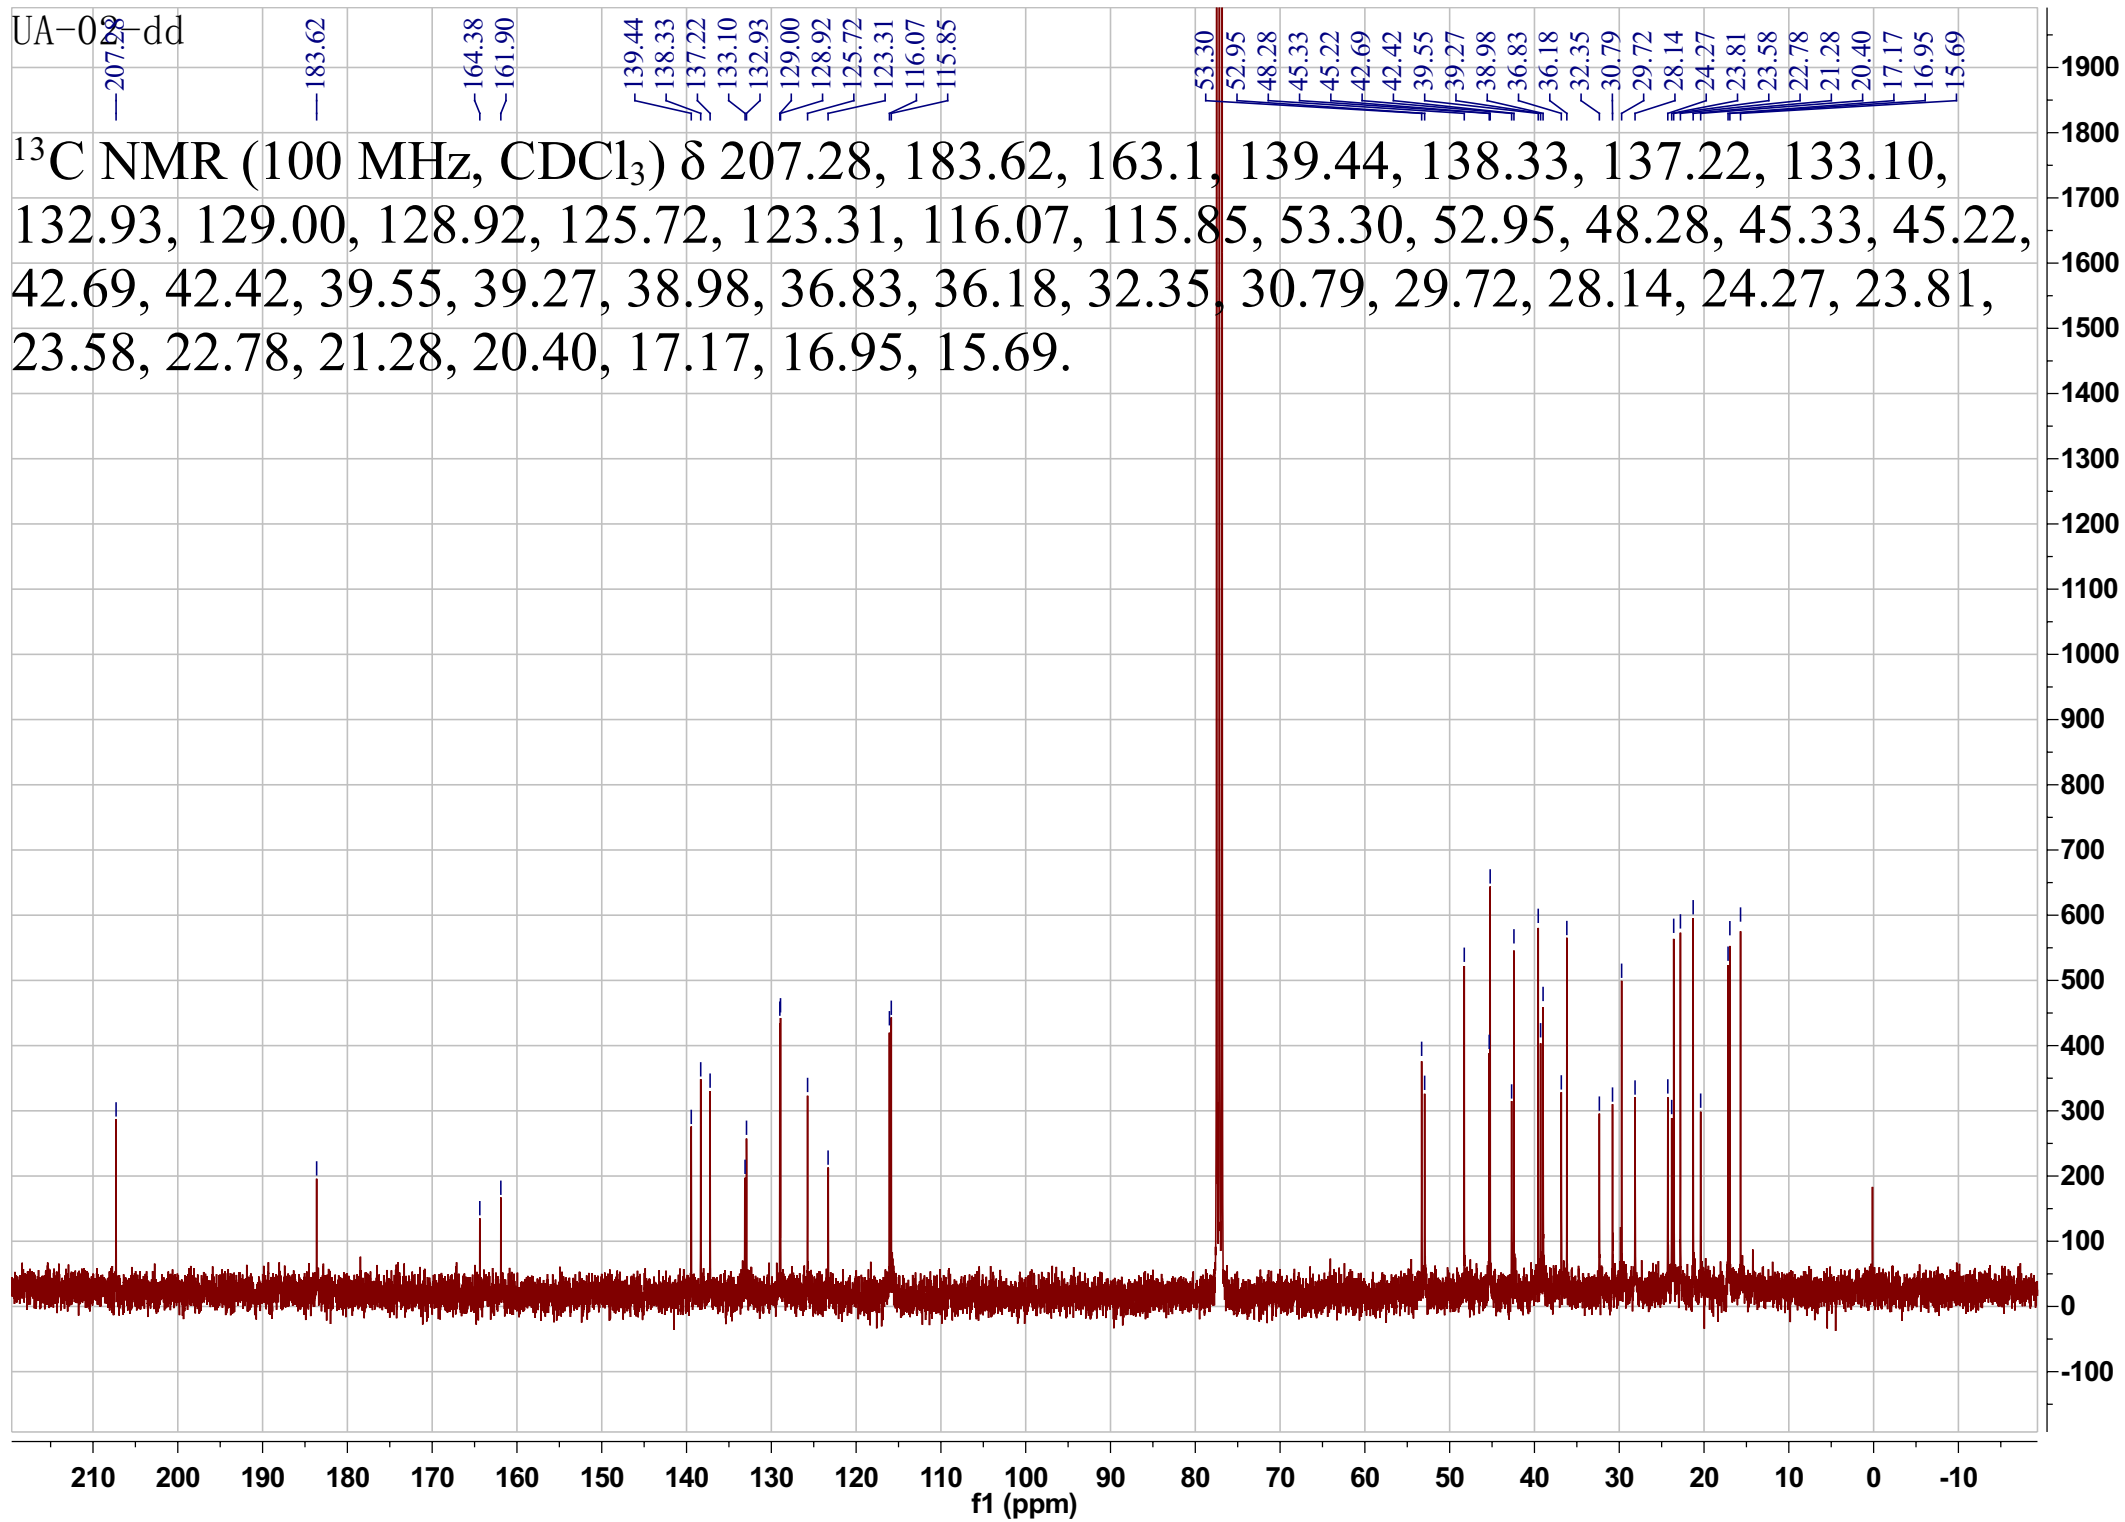

Compound code: UA-O-d

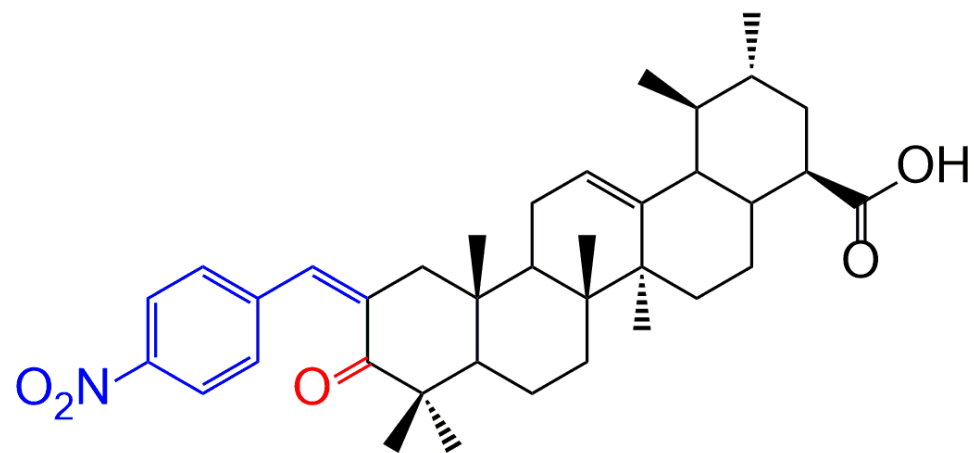

Figure 9. The structure of compound UA-O-d.

UA-02-f

$^1\text{H}$  NMR (400 MHz,  $\text{CDCl}_3$ )  $\delta$  8.27 (d,  $J = 8.5$  Hz, 2H), 7.56 (s, 1H), 7.53 (s, 2H), 5.27 (s, 1H), 2.96 (d,  $J = 16.3$  Hz, 1H), 2.29 (d,  $J = 16.7$  Hz, 1H), 2.21 (d,  $J = 11.3$  Hz, 1H), 2.07 – 1.80 (m, 4H), 1.78 – 1.60 (m, 4H), 1.60 – 1.46 (m, 4H), 1.45 – 1.23 (m, 6H), 1.19 – 1.07 (m, 10H), 0.98 – 0.93 (m, 3H), 0.90 (d,  $J = 6.2$  Hz, 3H), 0.87 (s, 3H), 0.82 (d,  $J = 6.8$  Hz, 3H).

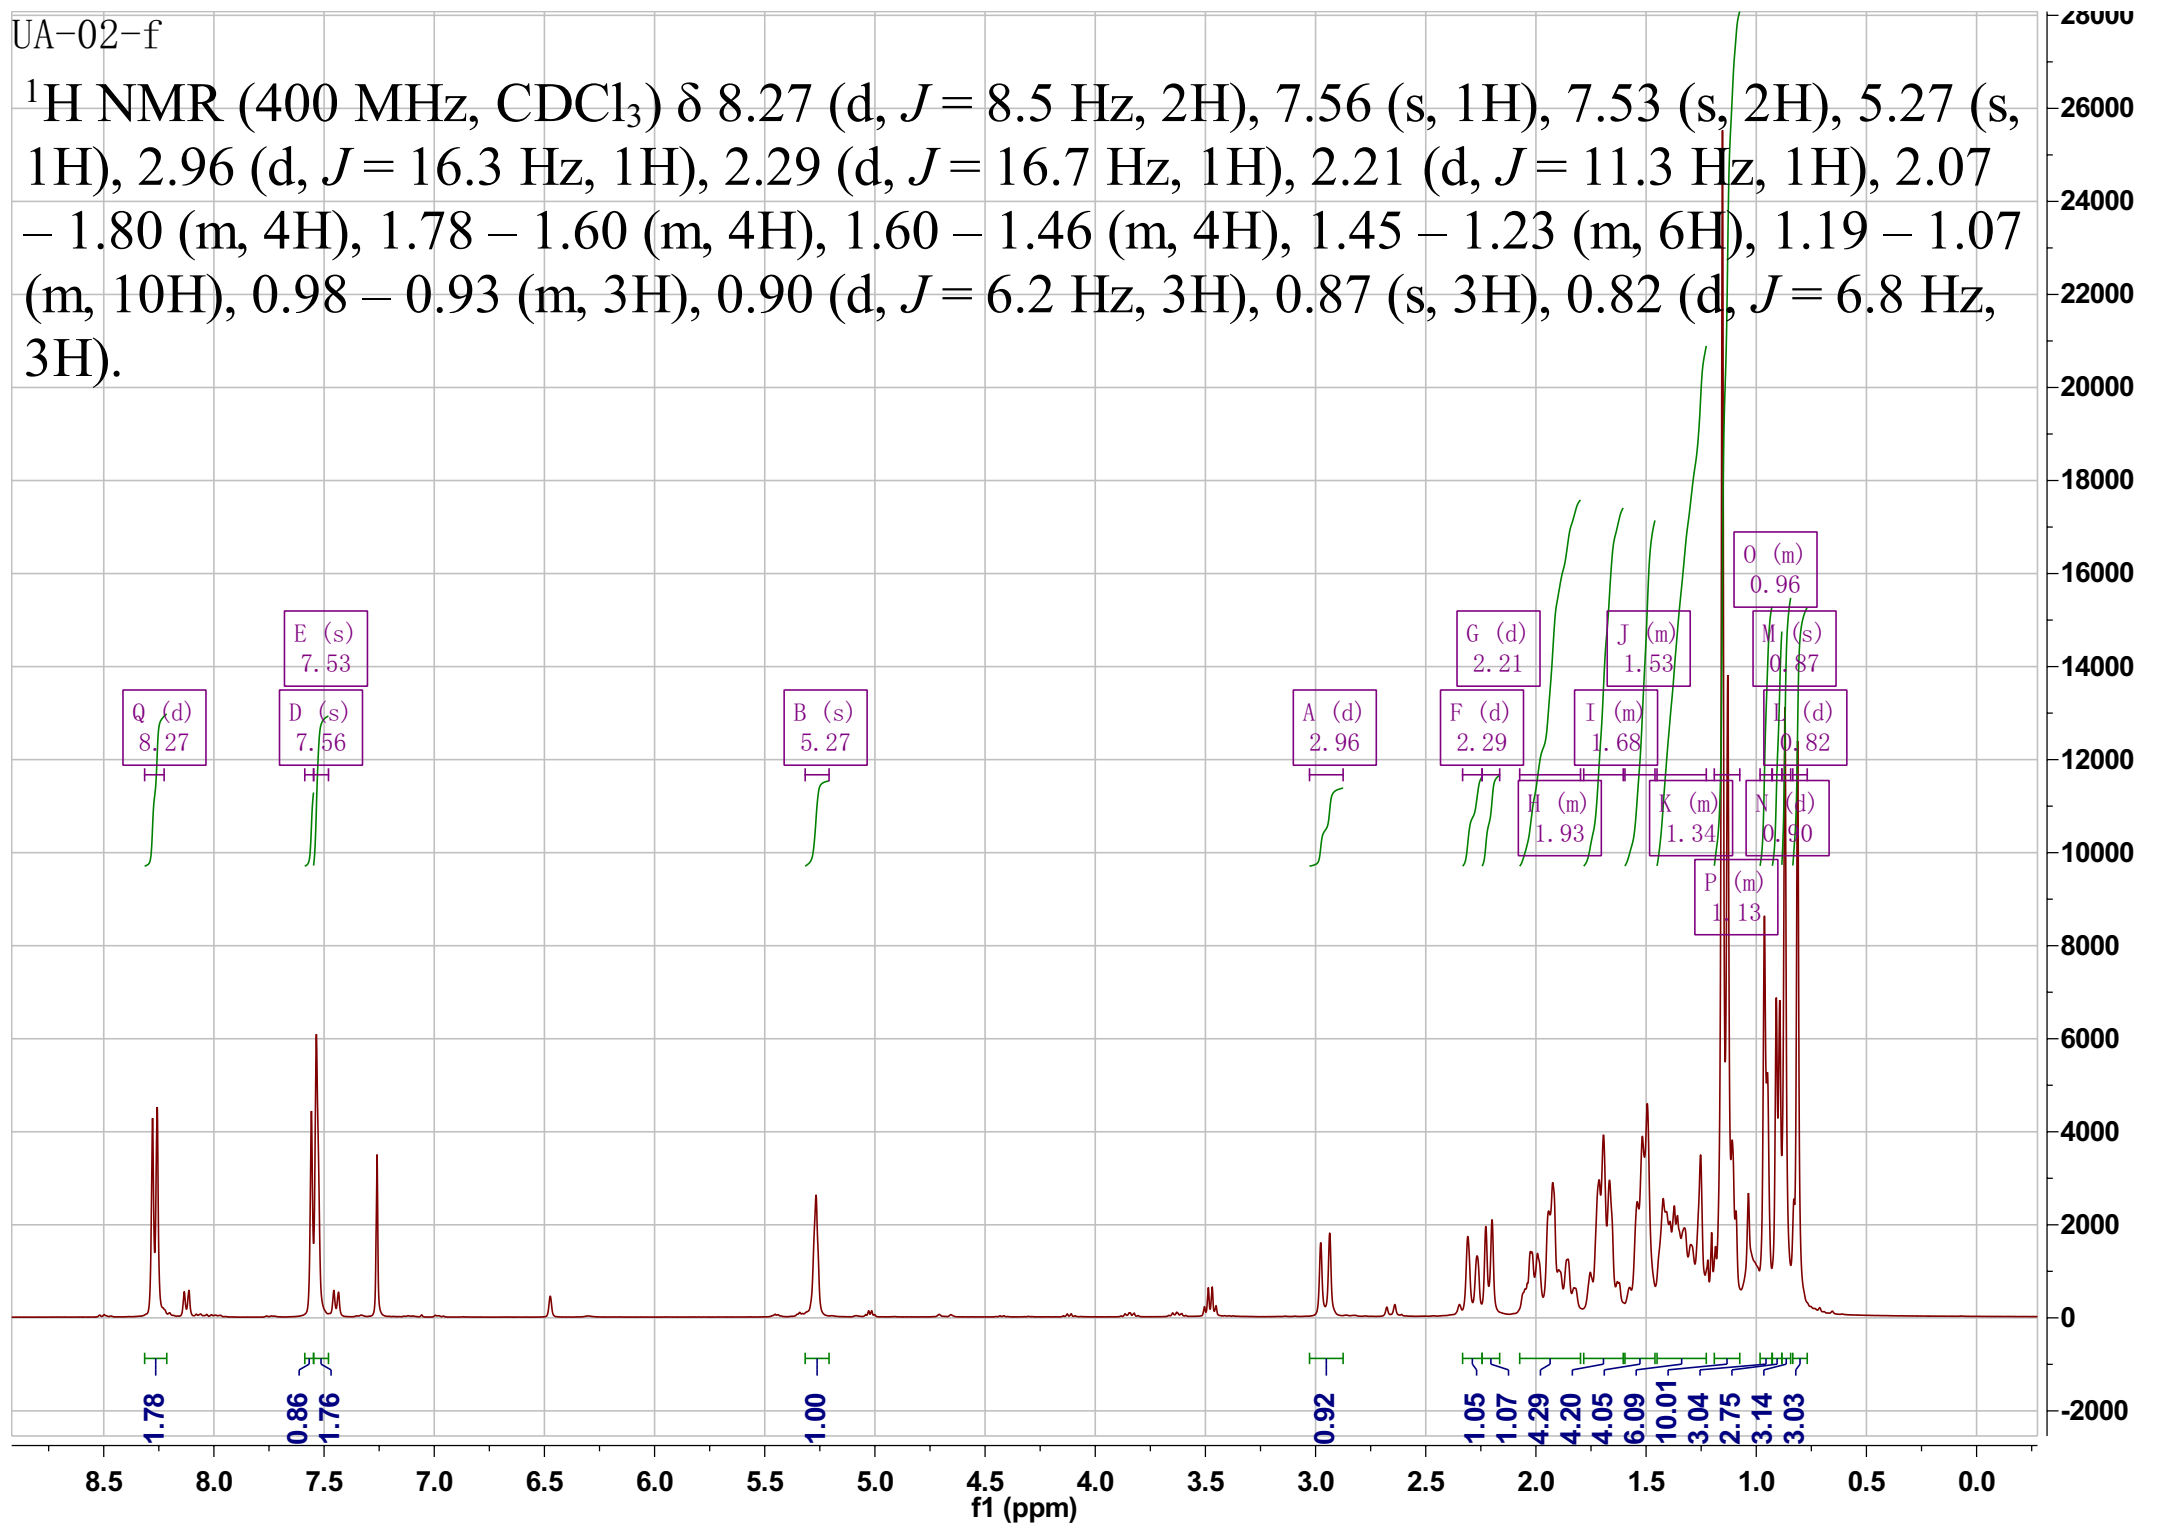

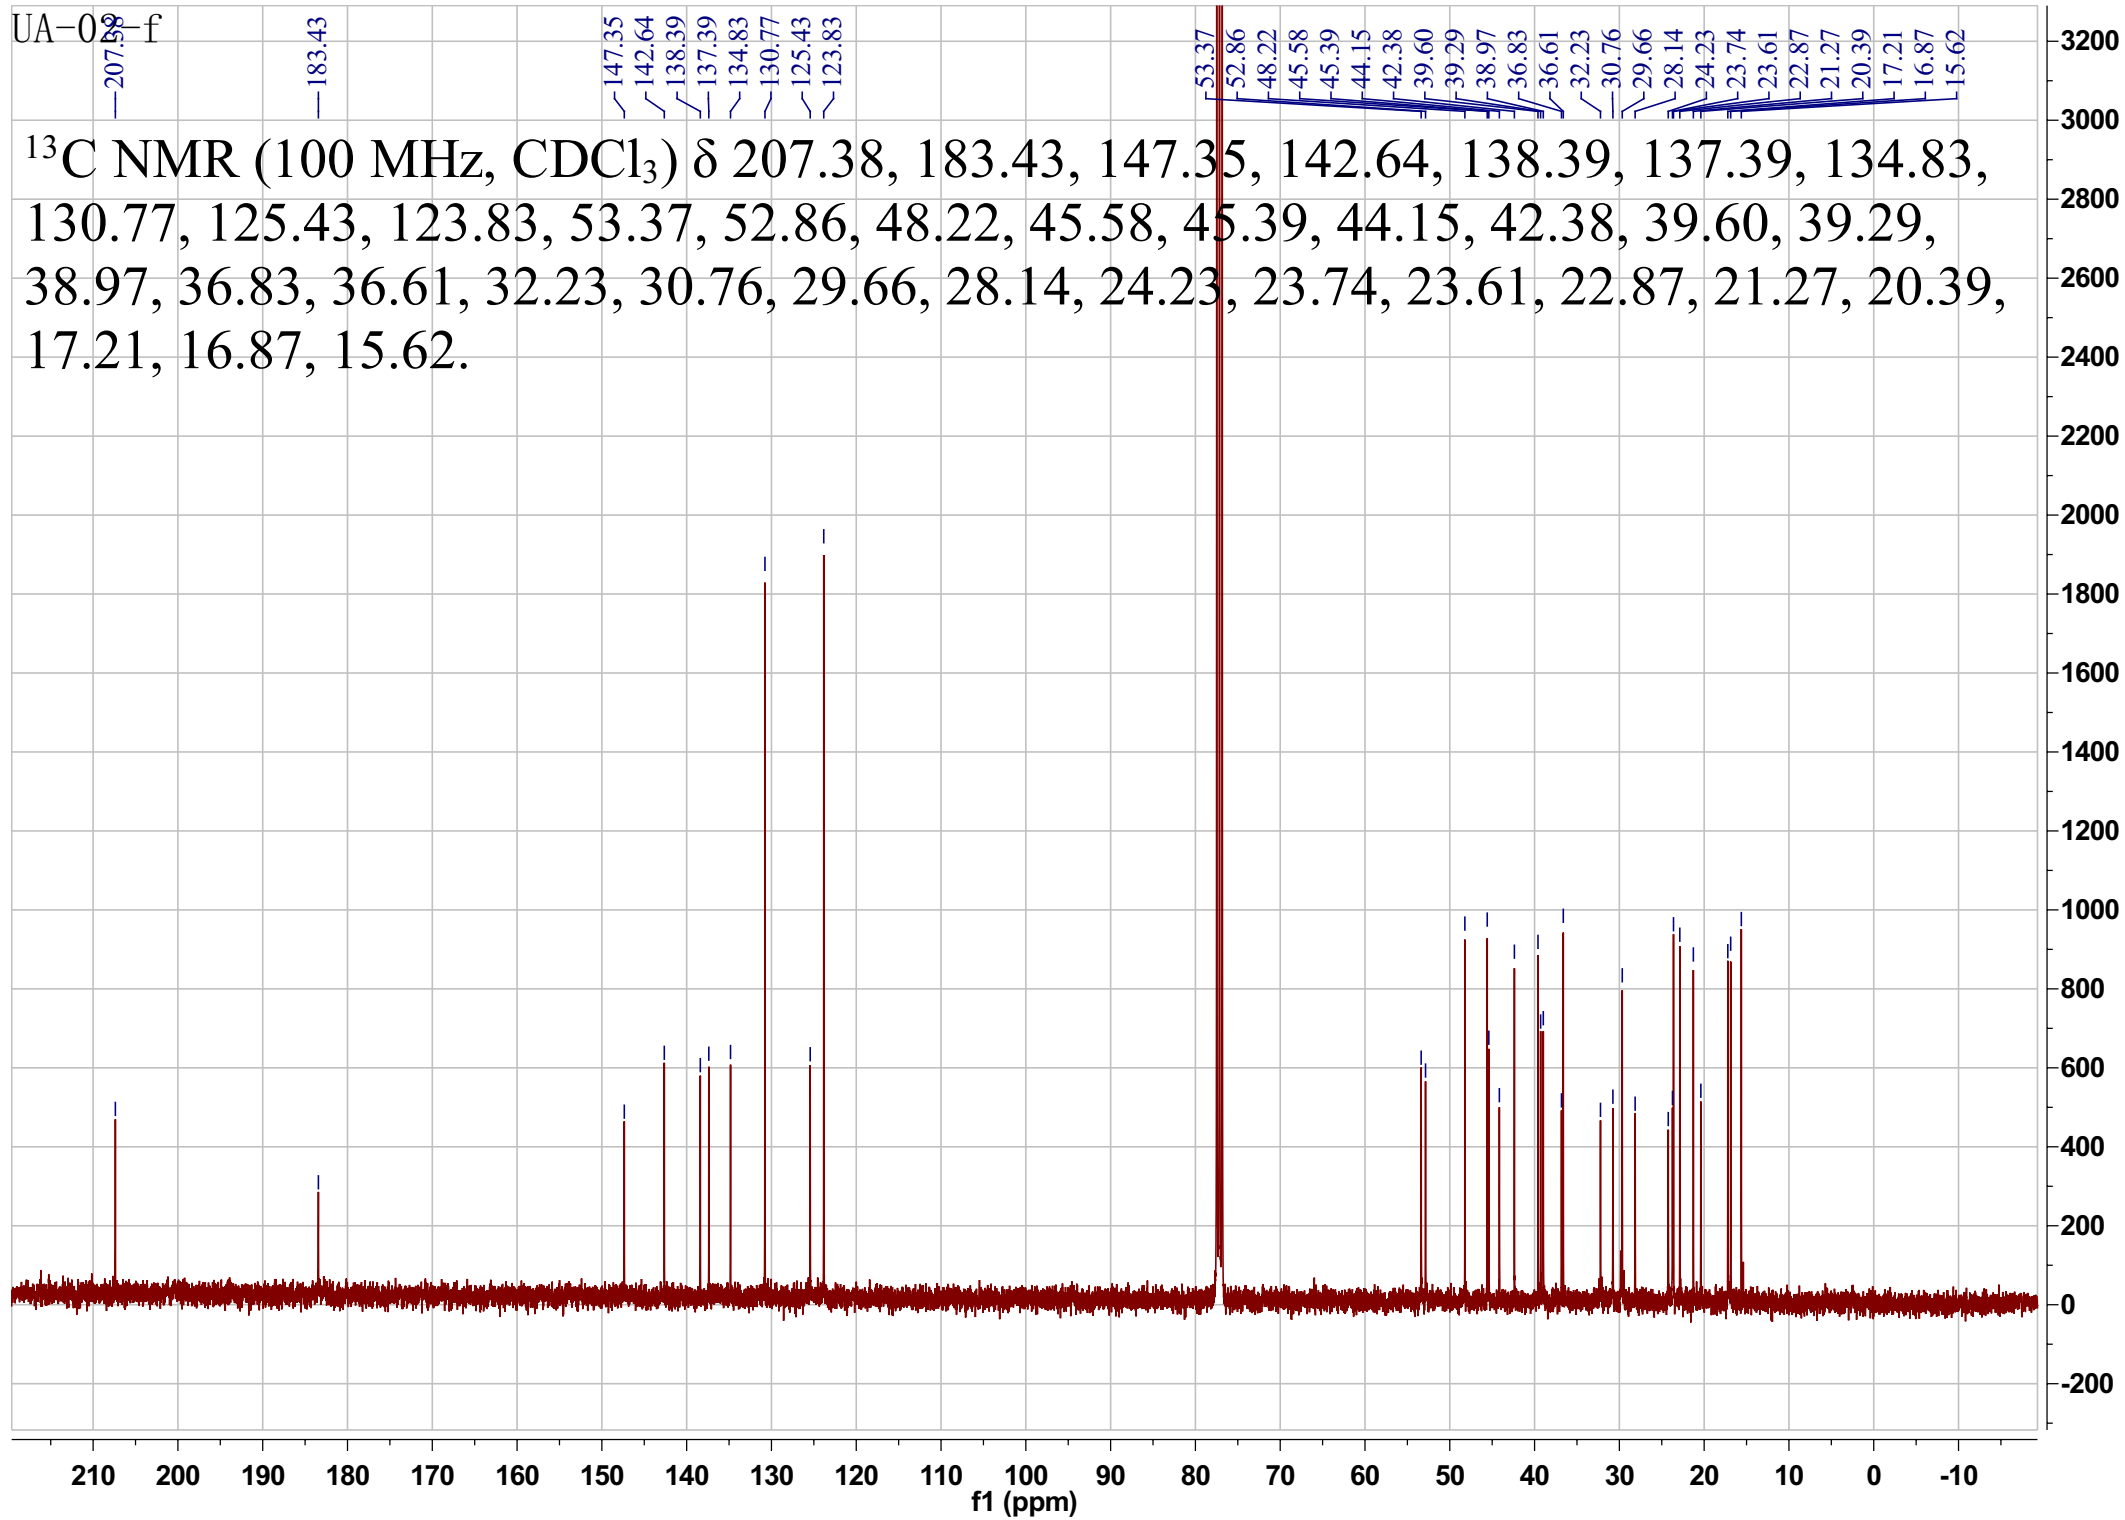

**Compound code: UA-O-e**

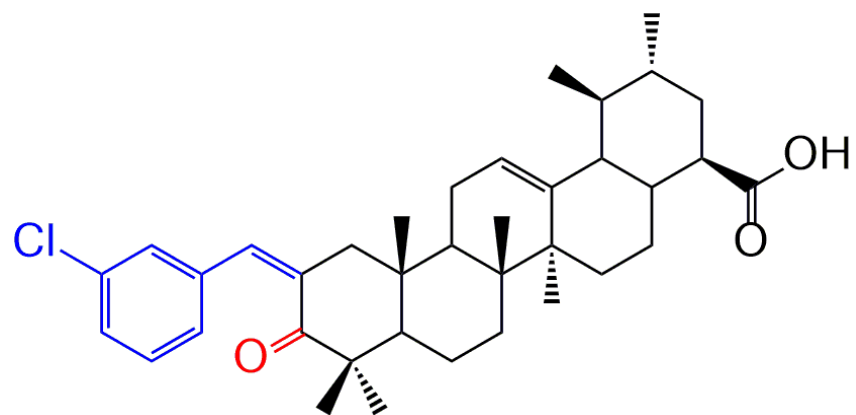

**Figure 10. The structure of compound UA-O-e.**

UA-02-g

$^1\text{H}$  NMR (400 MHz,  $\text{CDCl}_3$ )  $\delta$  7.46 – 7.39 (m, 1H), 7.39 – 7.32 (m, 2H), 7.32 – 7.27 (m, 2H), 5.29 (t, 1H), 2.97 (d,  $J = 16.2$  Hz, 1H), 2.30 – 2.17 (m, 2H), 2.08 – 1.83 (m, 4H), 1.79 – 1.61 (m, 4H), 1.59 – 1.23 (m, 10H), 1.13 (s, 9H), 1.07 – 1.00 (m, 1H), 0.99 – 0.93 (m, 3H), 0.90 (d,  $J = 7.3$  Hz, 3H), 0.86 (s, 3H), 0.82 (s, 3H).

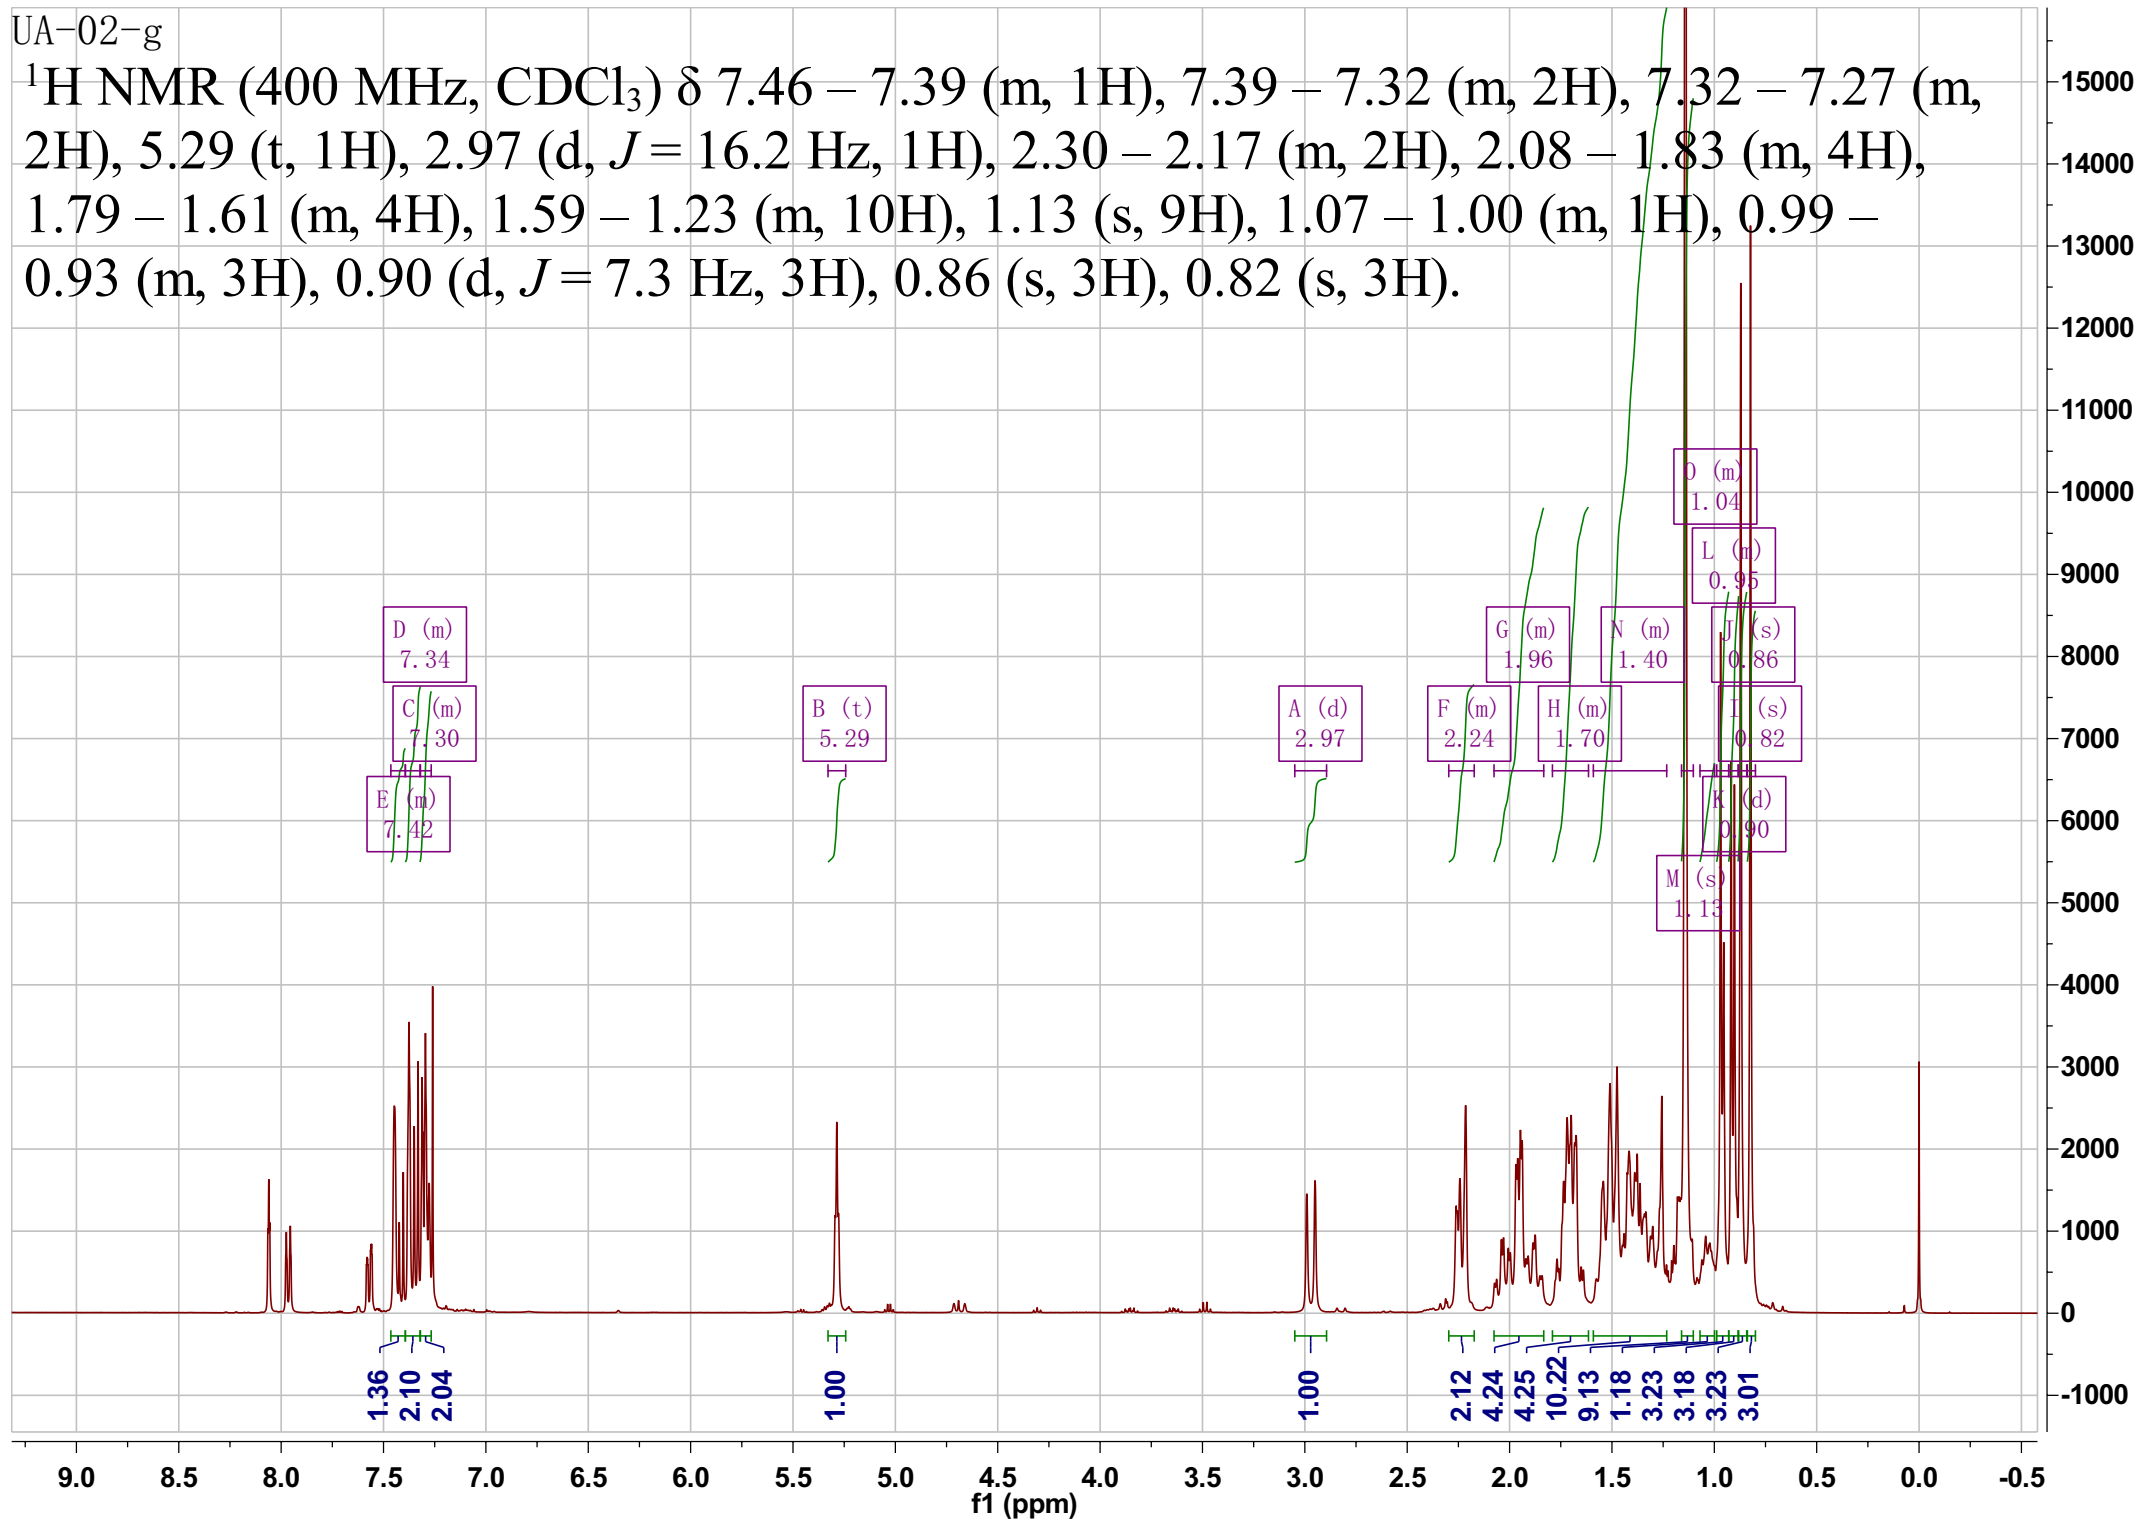

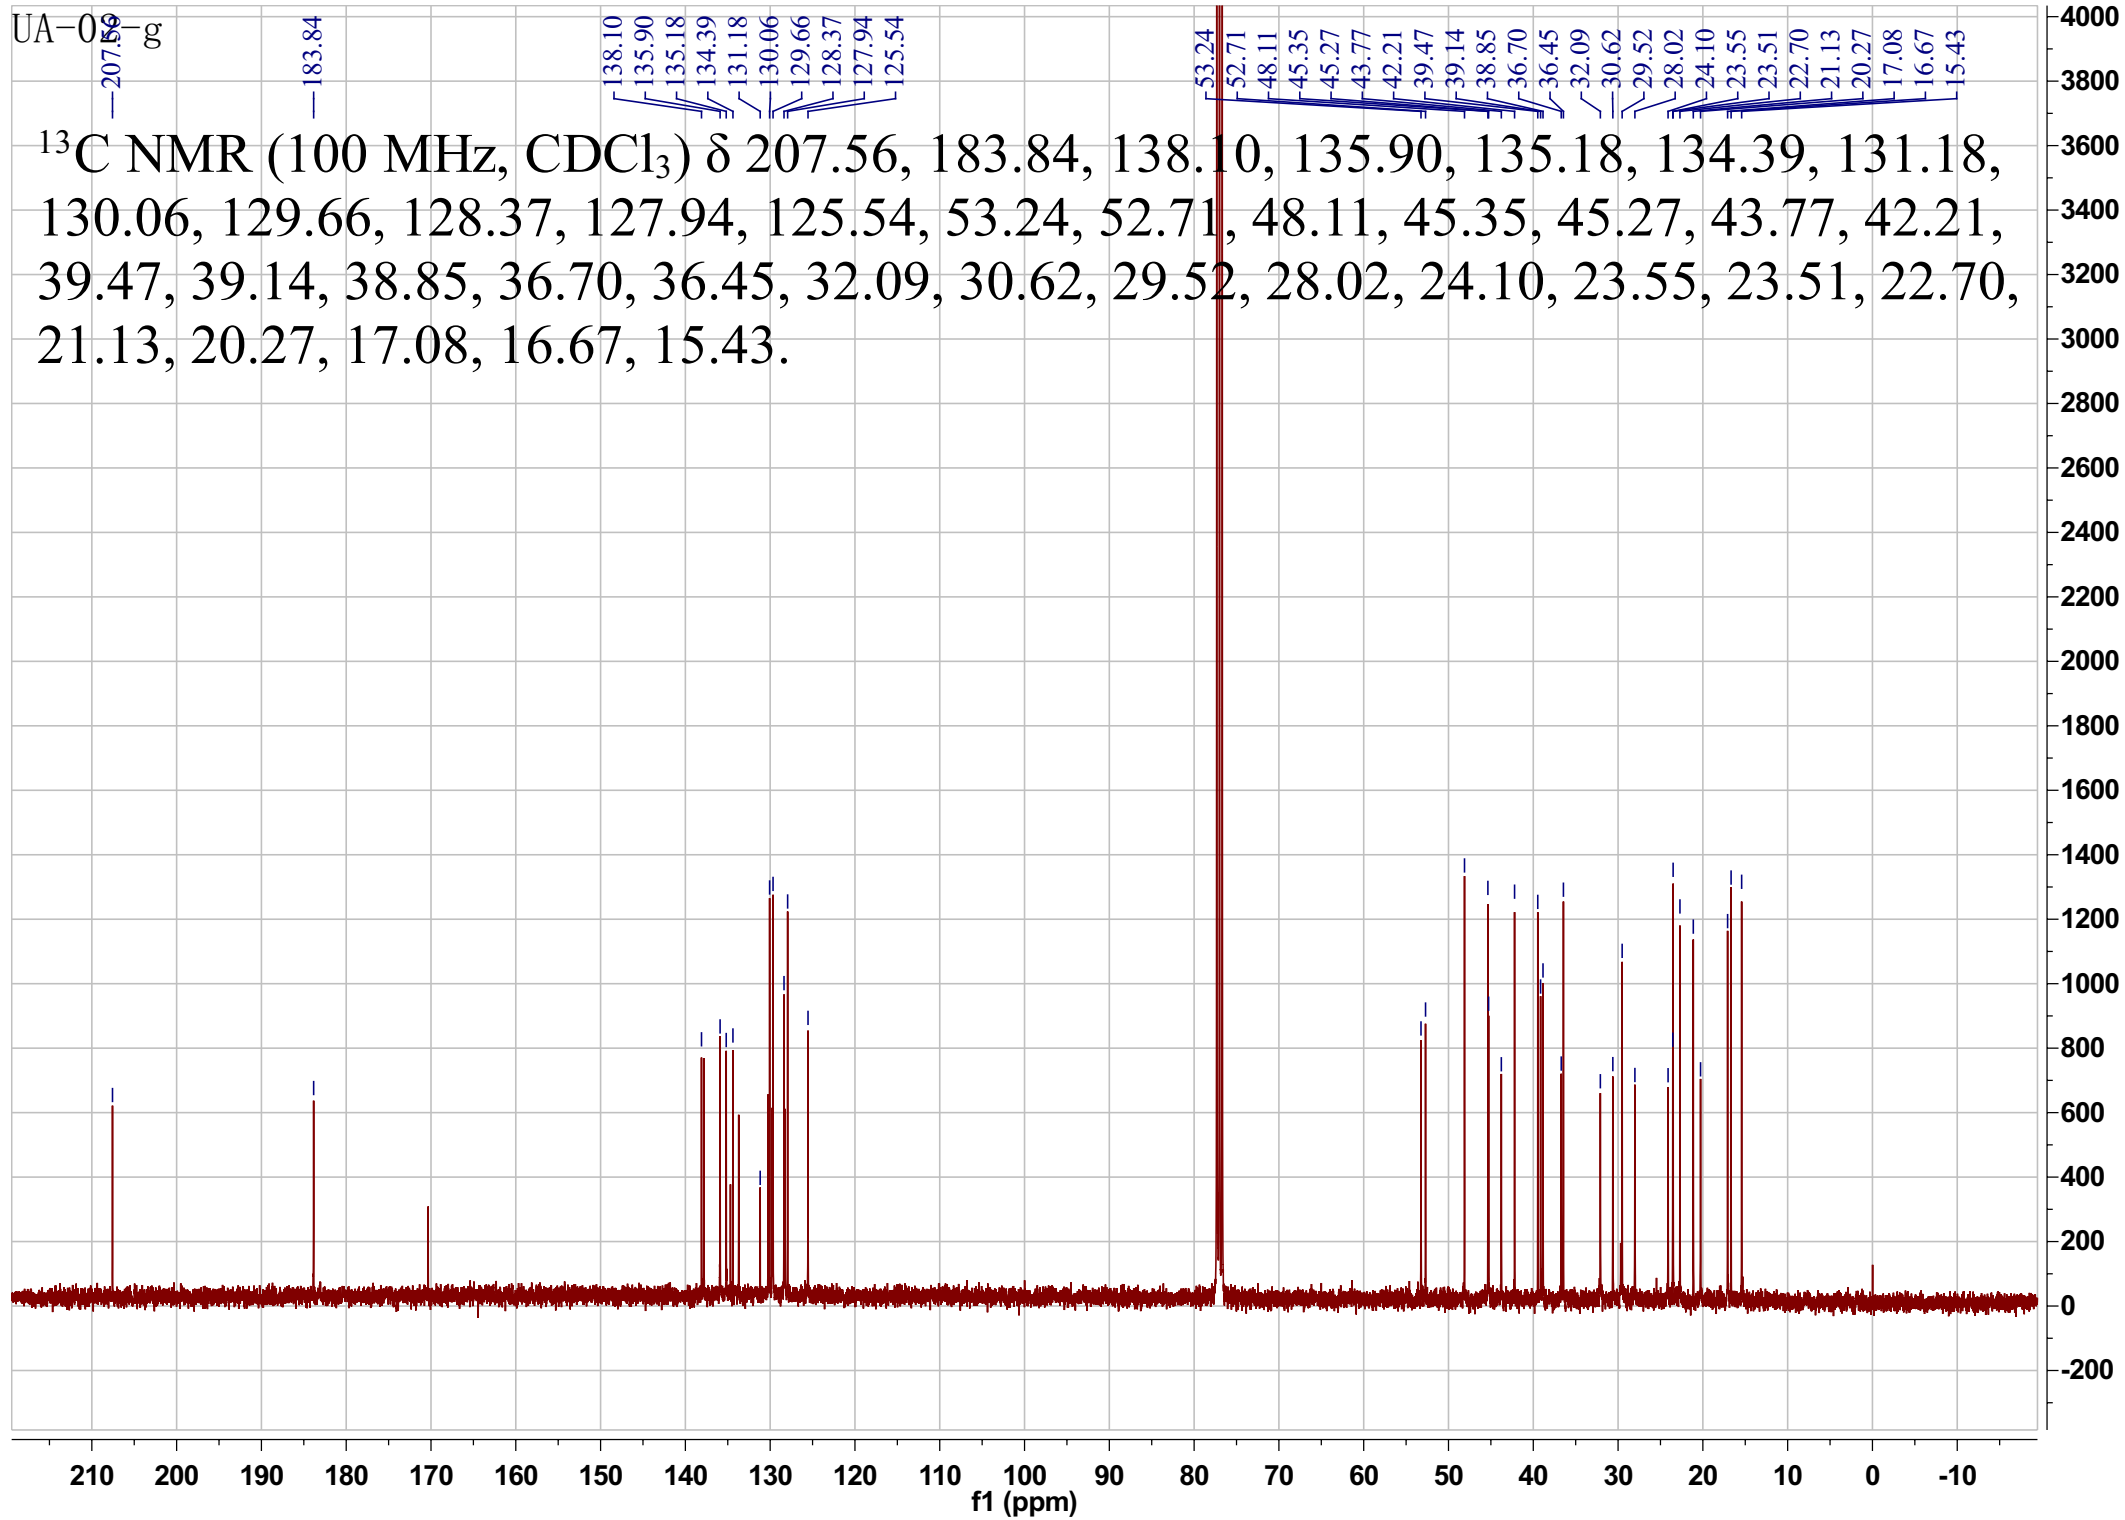

Compound code: UA-O-f

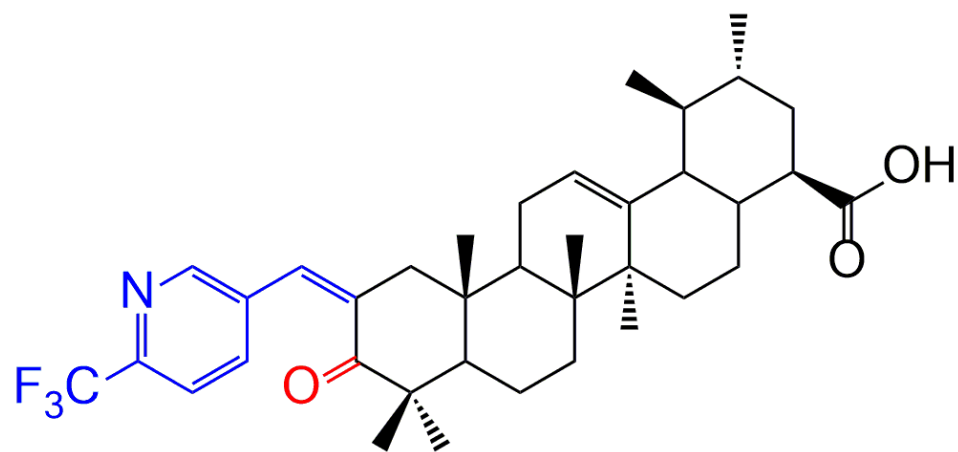

Figure 11. The structure of compound UA-O-f.



UA-02-h

$^1\text{H}$  NMR (400 MHz,  $\text{CDCl}_3$ )  $\delta$  8.83 (s, 1H), 7.90 (d,  $J = 8.1$  Hz, 1H), 7.76 (d,  $J = 8.1$  Hz, 1H), 7.52 (s, 1H), 5.30 (t,  $J = 3.2$  Hz, 1H), 3.00 (d,  $J = 15.4$  Hz, 1H), 2.34 (d,  $J = 17.3$  Hz, 1H), 2.24 (d, 1H), 2.10 – 1.93 (m, 3H), 1.88 (td,  $J = 13.3, 3.6$  Hz, 1H), 1.80 – 1.64 (m, 4H), 1.59 – 1.48 (m, 4H), 1.48 – 1.26 (m, 6H), 1.19 (d,  $J = 6.2$  Hz, 6H), 1.15 (s, 3H), 1.09 – 1.03 (m, 1H), 0.98 (d,  $J = 6.0$  Hz, 3H), 0.93 (d,  $J = 6.3$  Hz, 3H), 0.90 (s, 3H), 0.84 (s, 3H).

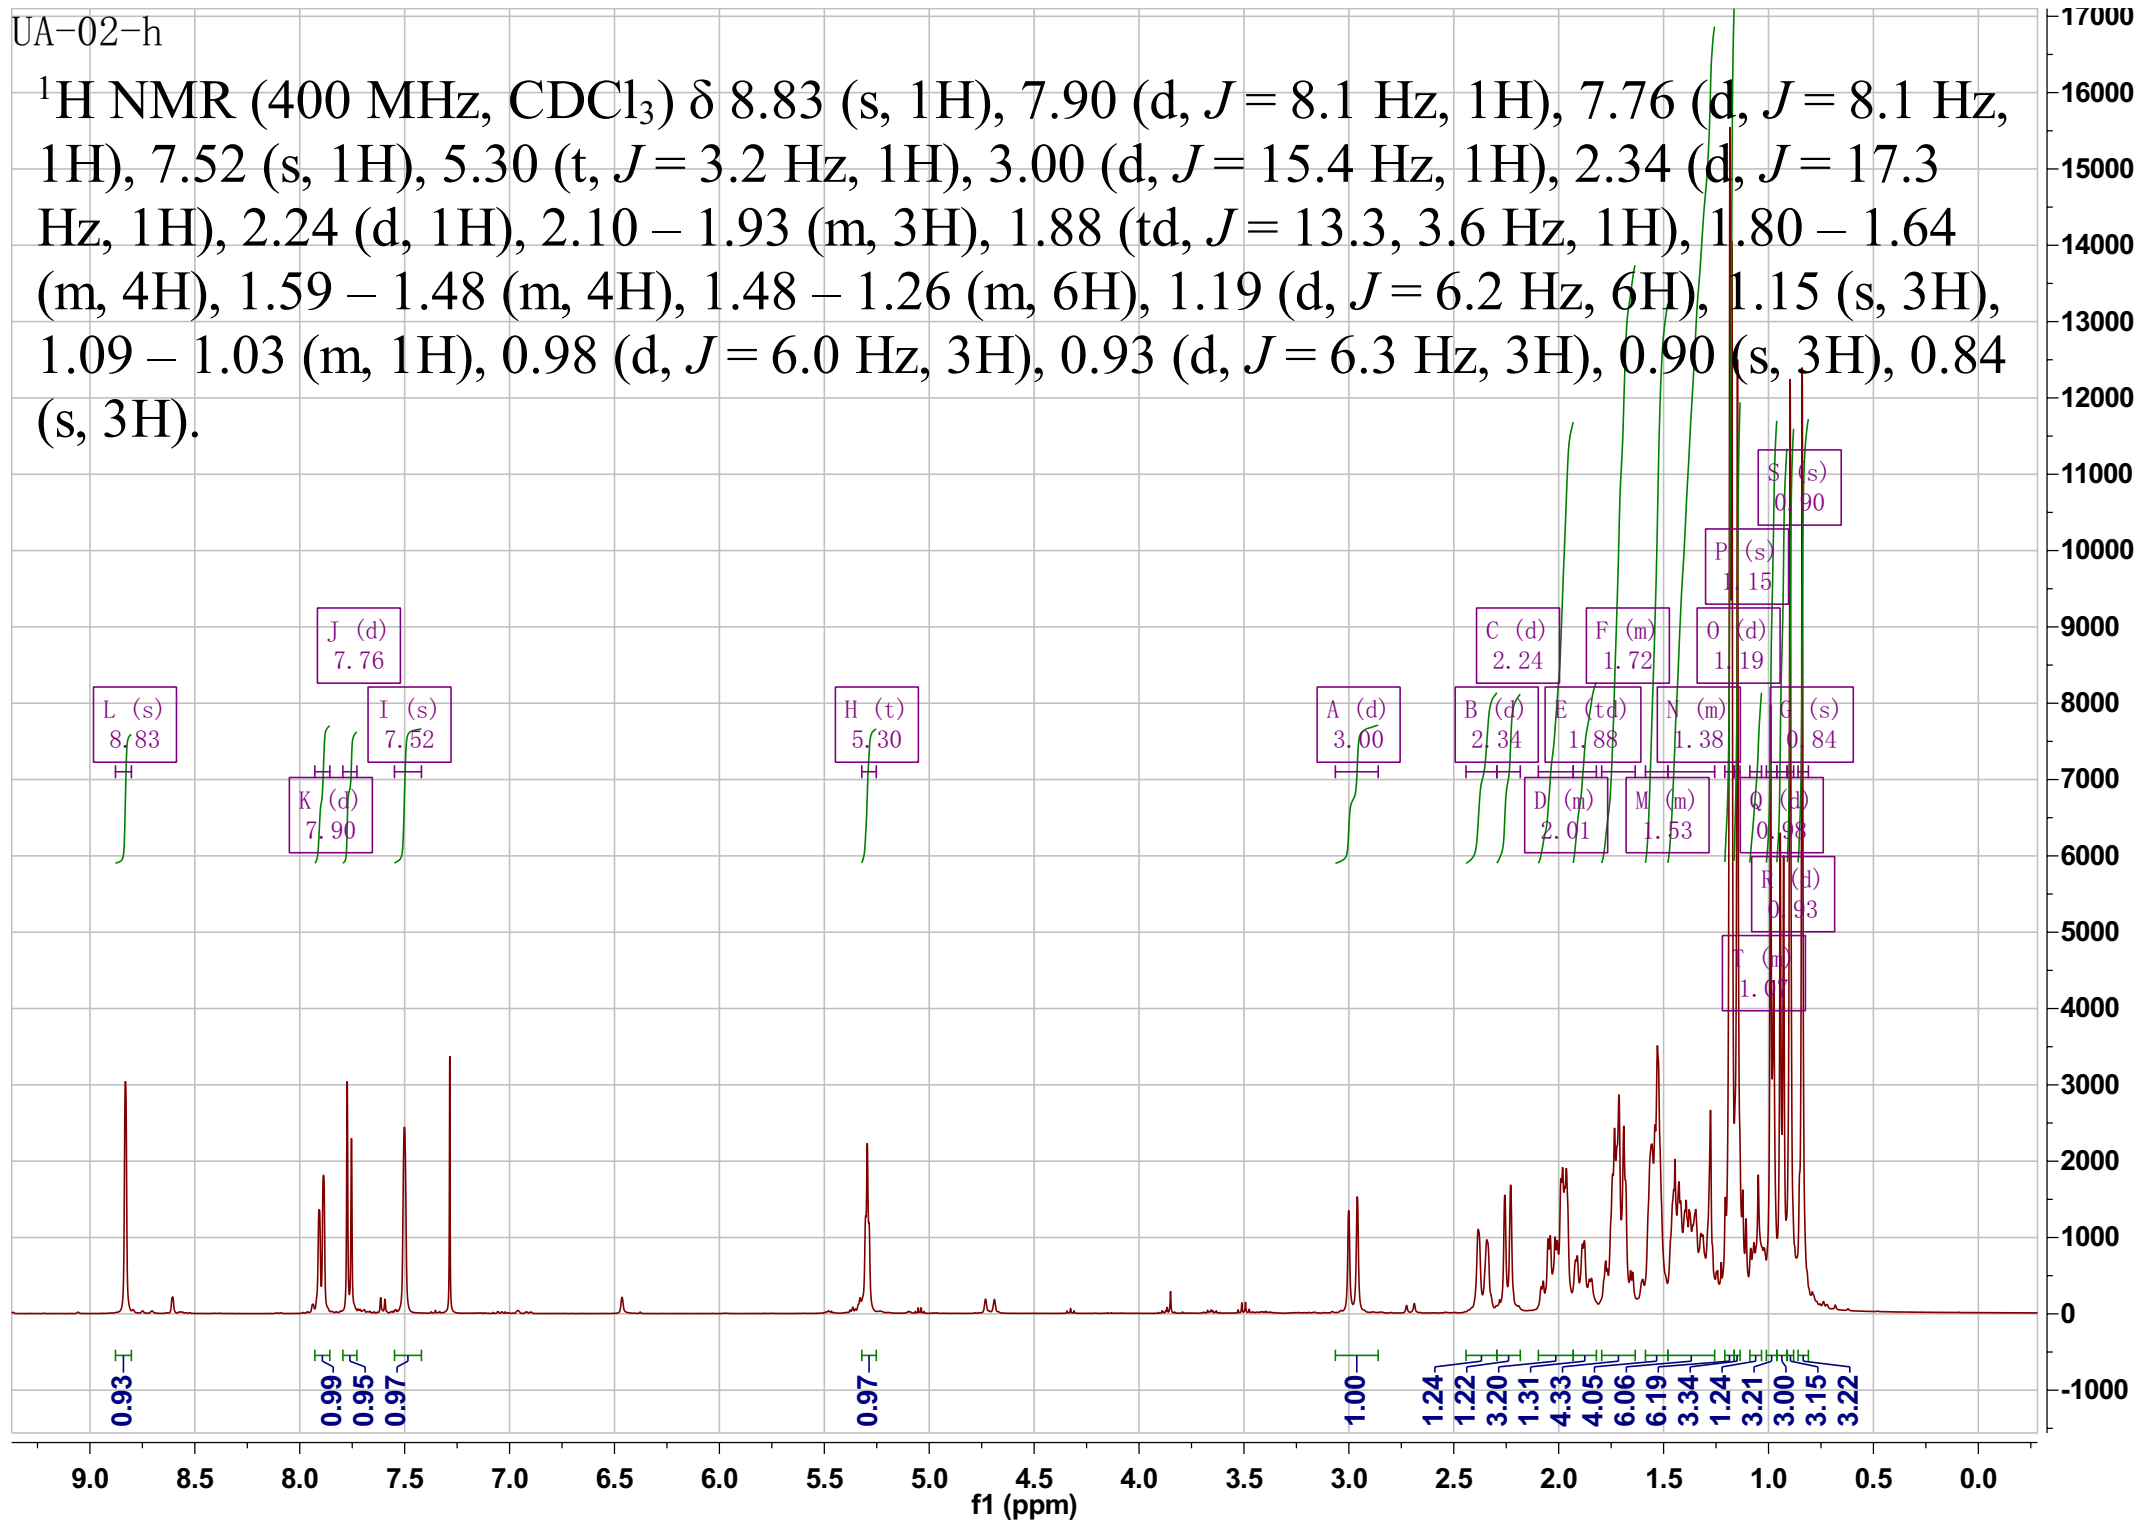

UA-02h

$^{13}\text{C}$  NMR (100 MHz,  $\text{CDCl}_3$ )  $\delta$  207.12, 183.62, 150.76, 147.2, 138.49, 138.35, 138.08, 134.88, 131.94, 125.43, 121.6, 120.4, 53.29, 52.88, 48.25, 45.52, 45.38, 44.45, 42.39, 39.59, 39.33, 38.99, 36.84, 36.54, 32.23, 30.79, 29.71, 28.13, 24.24, 23.76, 23.58, 22.80, 21.27, 20.39, 17.24, 16.87, 15.66.

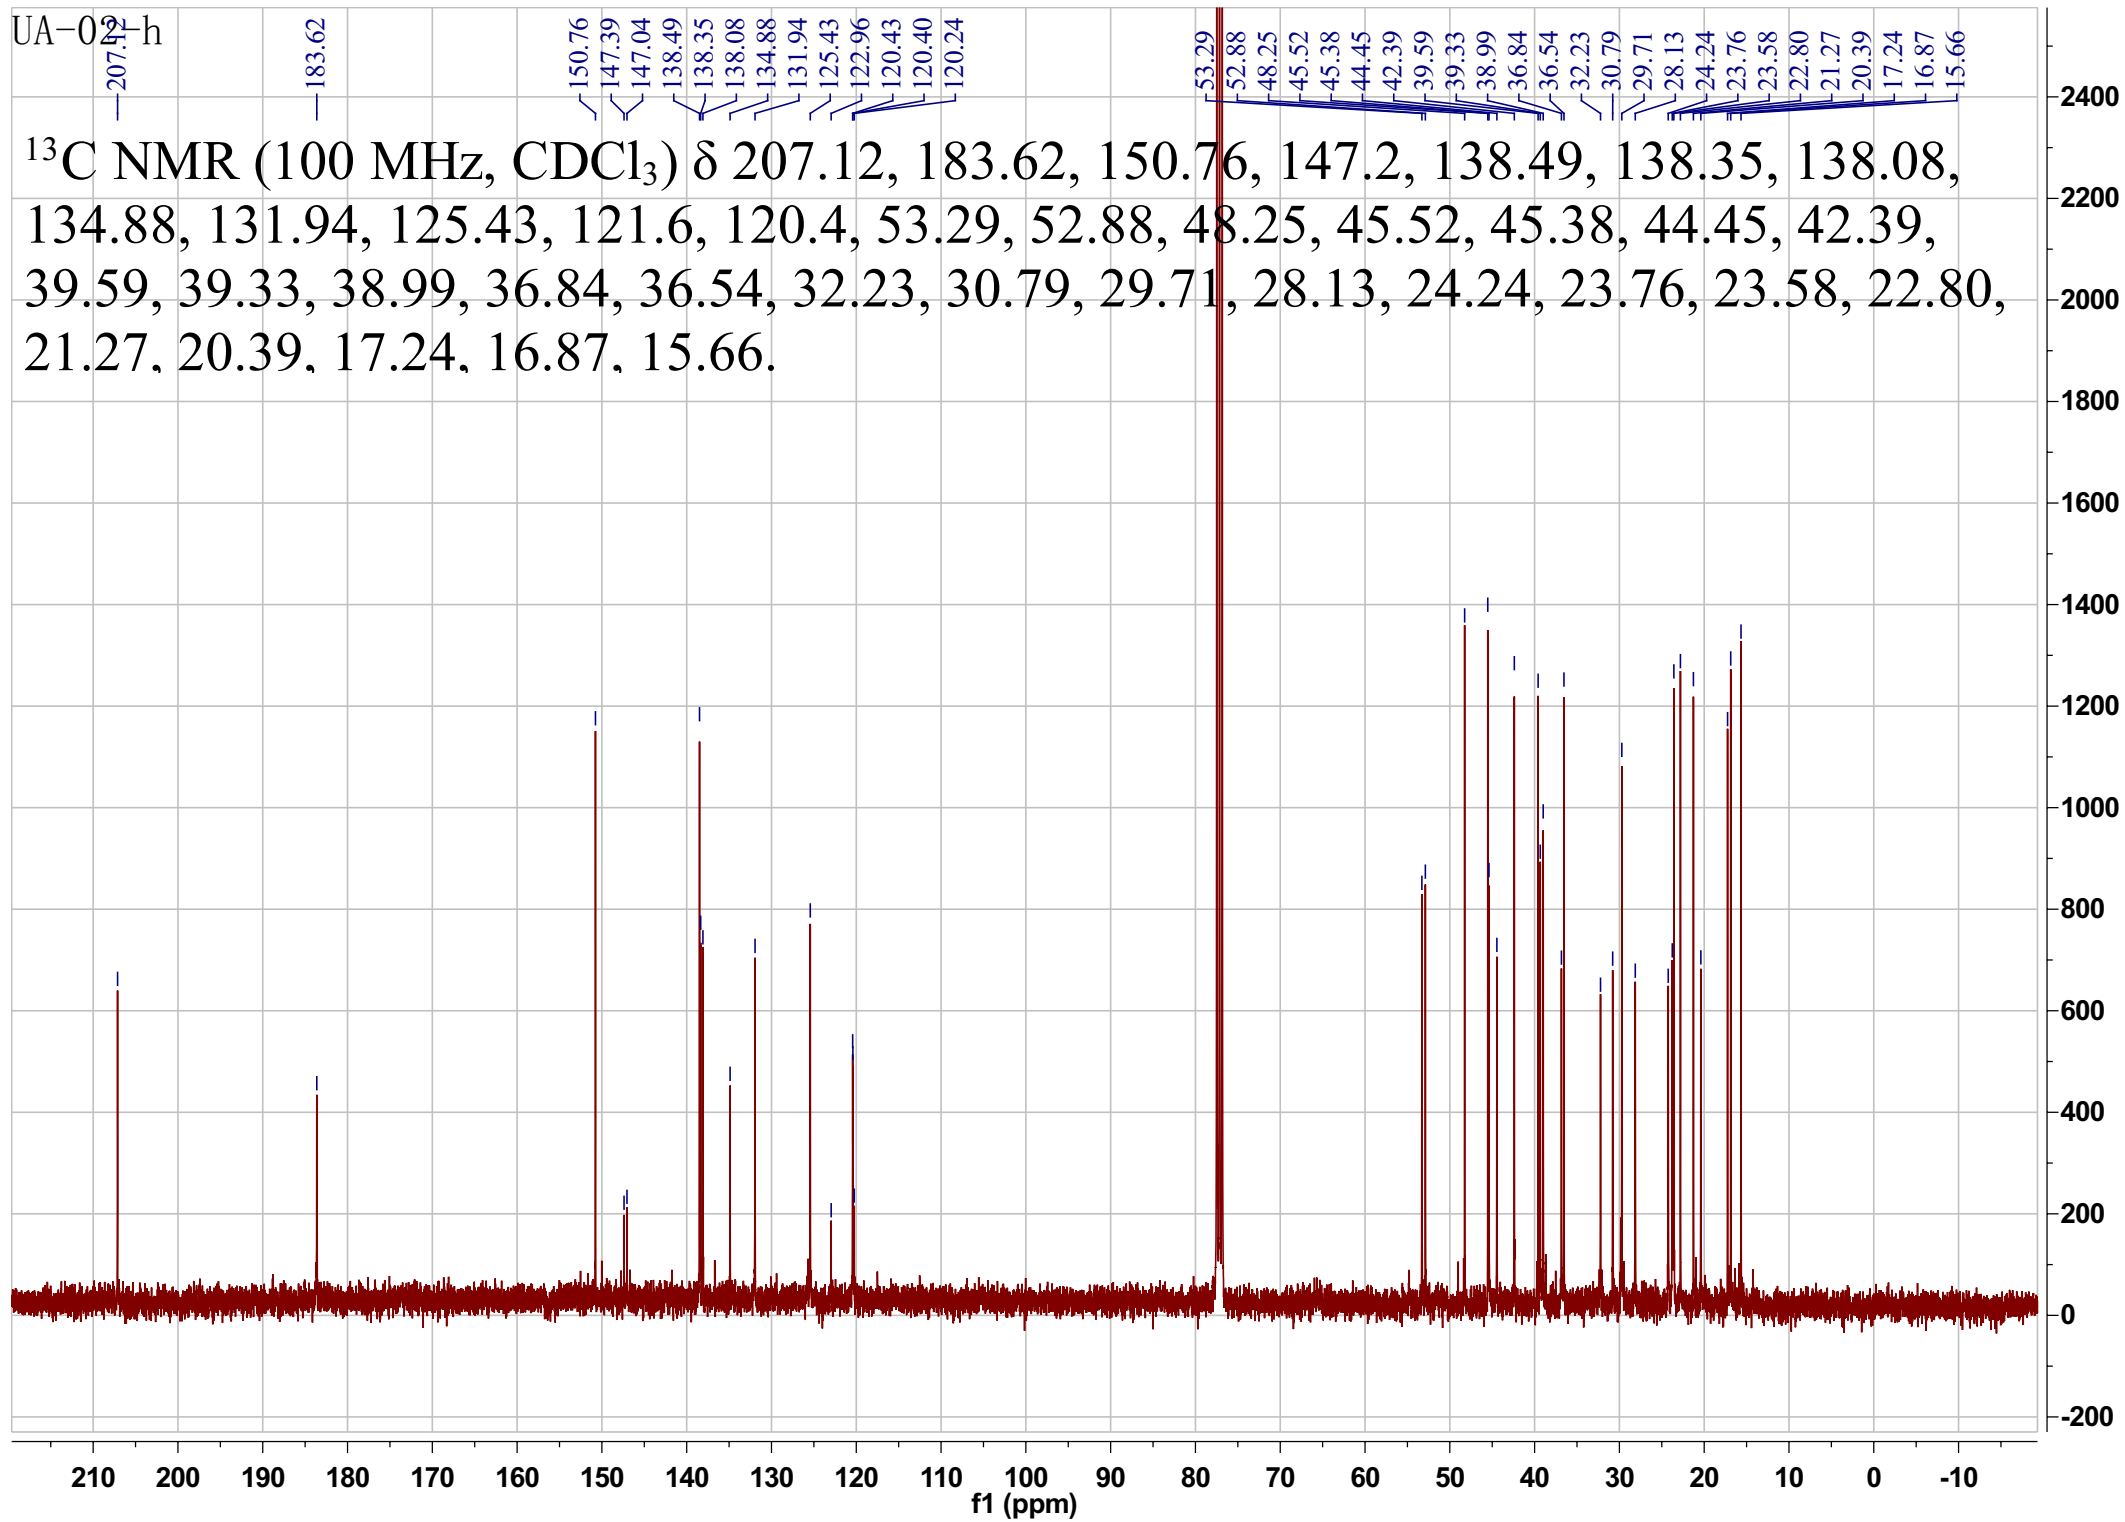

Compound code: UA-O-g

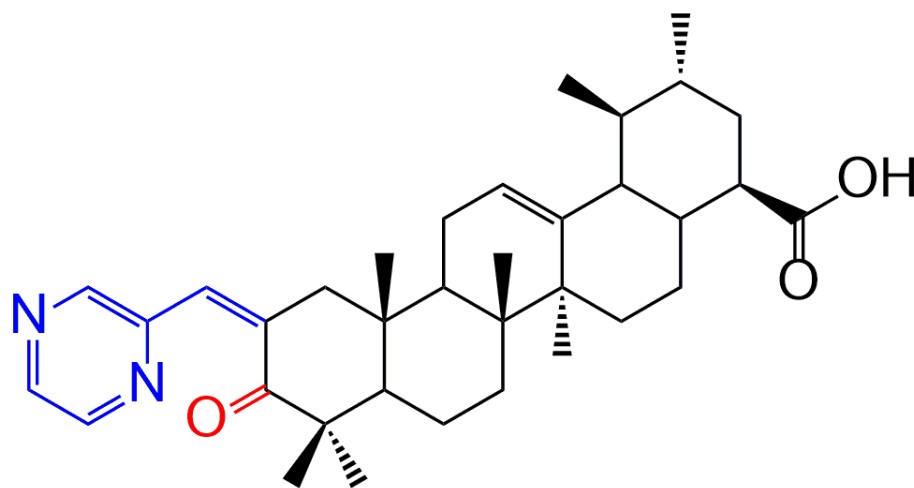

Figure 12. The structure of compound UA-O-g.

UA-02-I

$^1\text{H}$  NMR (400 MHz,  $\text{CDCl}_3$ )  $\delta$  8.72 – 8.60 (m, 2H), 8.43 (d,  $J = 2.2$  Hz, 1H), 7.40 (s, 1H), 5.29 (t,  $J = 11.1$  Hz, 1H), 3.54 (d,  $J = 15.0$  Hz, 1H), 2.43 (d,  $J = 14.8$  Hz, 1H), 2.23 (d, 1H), 2.13 – 1.95 (m, 3H), 1.94 – 1.83 (m, 1H), 1.79 – 1.62 (m, 4H), 1.58 – 1.46 (m, 4H), 1.43 – 1.35 (m, 3H), 1.34 – 1.23 (m, 4H), 1.17 (s, 3H), 1.13 (s, 6H), 0.96 (d,  $J = 6.2$  Hz, 3H), 0.91 (d,  $J = 5.3$  Hz, 3H), 0.89 (s, 3H), 0.83 (s, 3H).

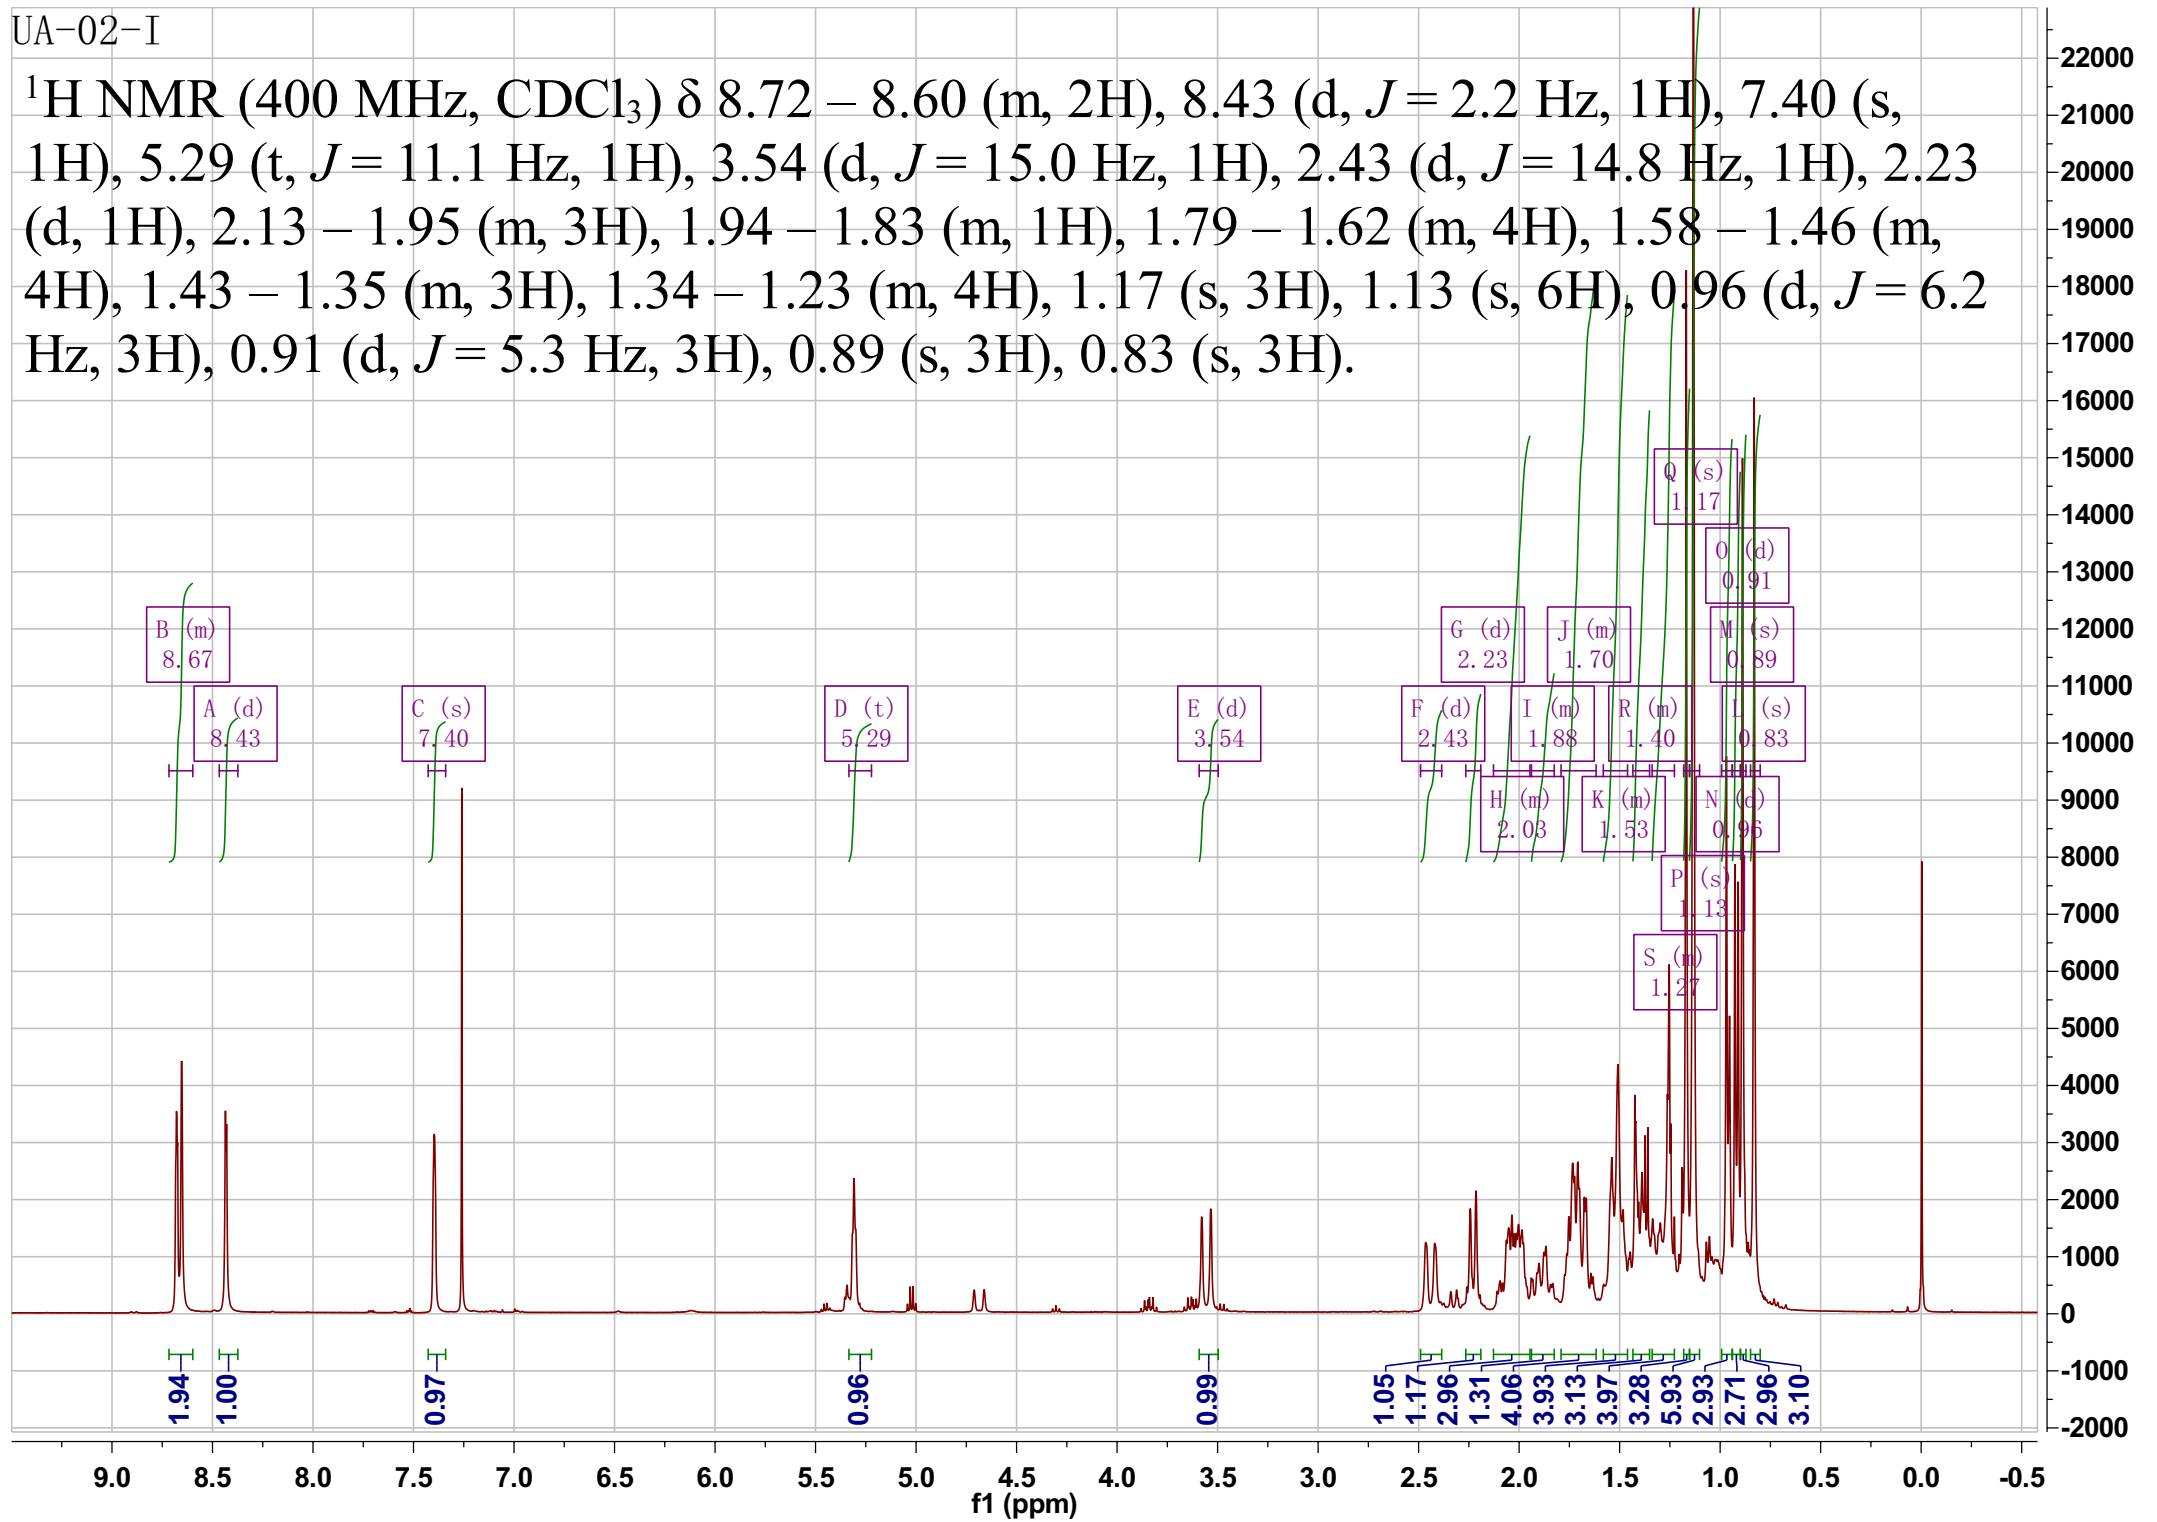

UA-05-I

$^{13}\text{C}$  NMR (100 MHz,  $\text{CDCl}_3$ )  $\delta$  208.15, 183.00, 151.77, 147.63, 144.33, 142.68, 141.32, 138.21, 130.39, 125.84, 53.33, 52.97, 48.24, 45.56, 45.29, 44.91, 42.42, 39.58, 39.32, 39.03, 36.87, 36.26, 32.26, 30.81, 29.72, 28.19, 24.32, 23.79, 23.61, 22.73, 21.29, 20.46, 17.23, 16.89, 15.84.

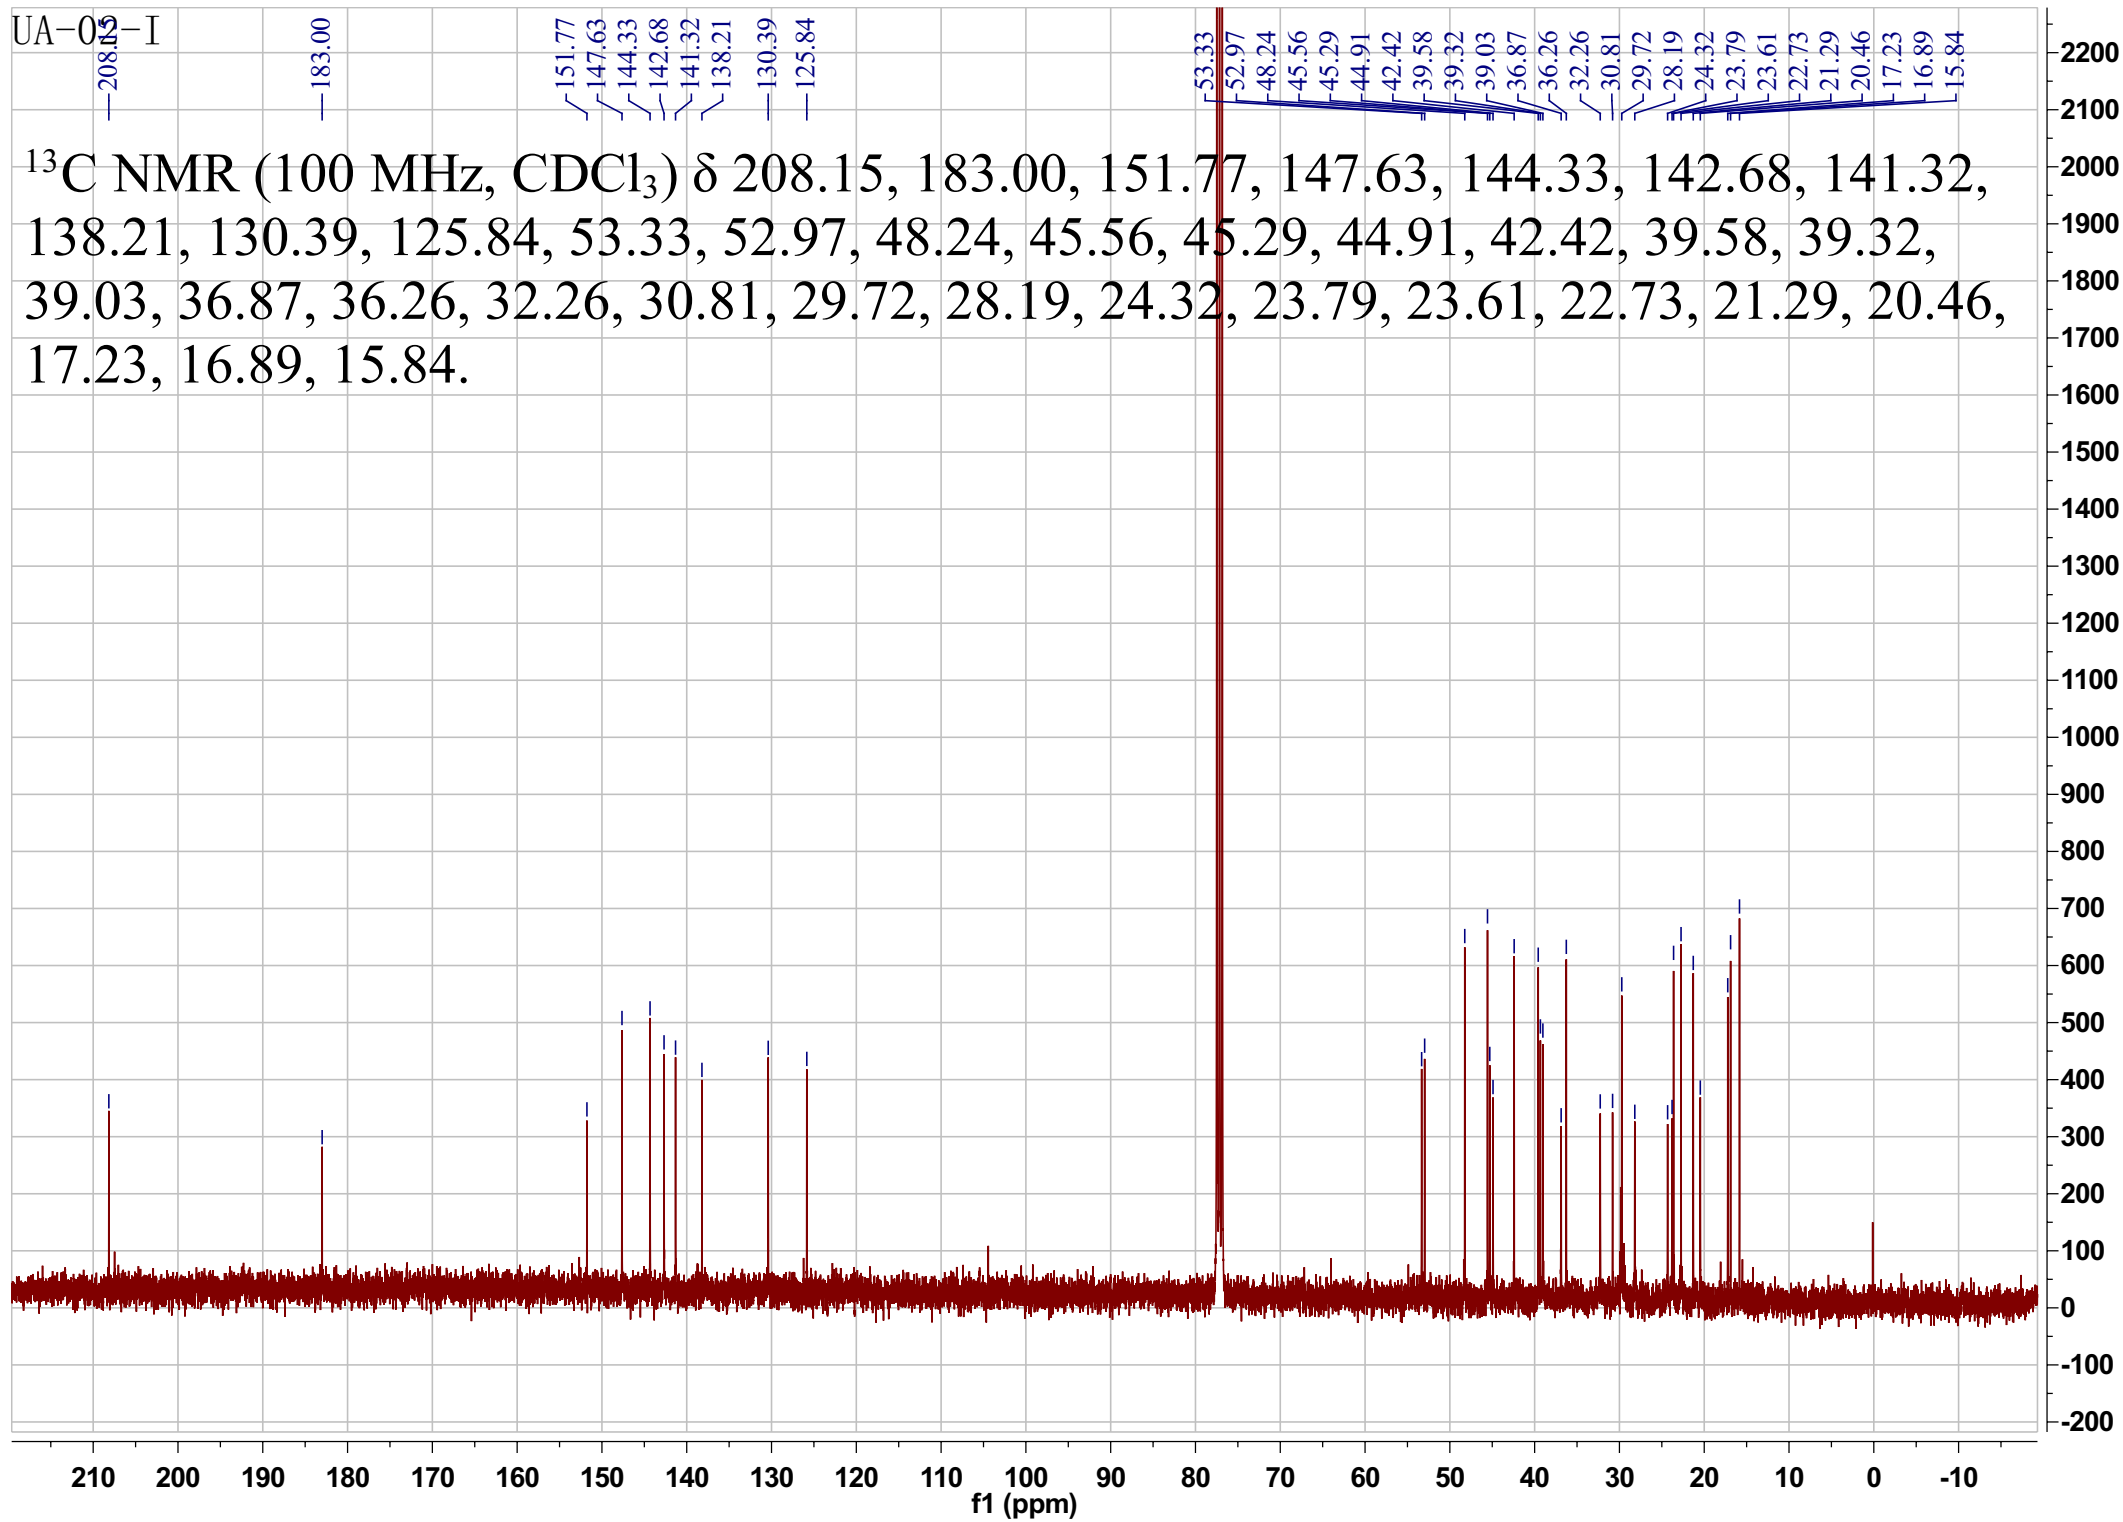

Compound code: UA-O-h

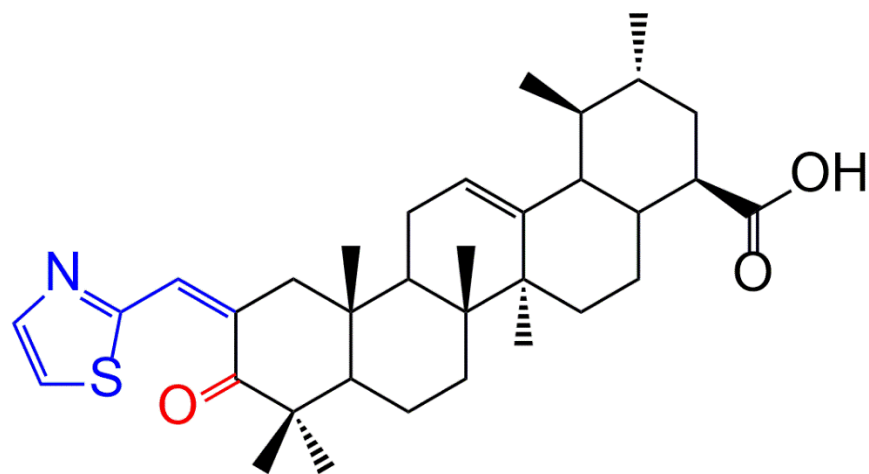

Figure 13. The structure of compound UA-O-h.

UA-02-j

$^1\text{H}$  NMR (400 MHz,  $\text{CDCl}_3$ )  $\delta$  8.01 (d,  $J = 3.2$  Hz, 1H), 7.64 (s, 1H), 7.50 (d,  $J = 5.3$  Hz, 1H), 5.33 (s, 1H), 3.37 (d,  $J = 17.8$  Hz, 1H), 2.34 (d,  $J = 17.2$  Hz, 1H), 2.24 (d,  $J = 11.3$  Hz, 1H), 2.20 – 2.10 (m, 1H), 2.09 – 1.96 (m, 2H), 1.88 (td,  $J = 13.6, 3.9$  Hz, 1H), 1.81 – 1.65 (m, 4H), 1.59 – 1.48 (m, 4H), 1.44 – 1.24 (m, 7H), 1.17 (s, 3H), 1.12 (d,  $J = 7.2$  Hz, 6H), 0.96 (d,  $J = 6.1$  Hz, 3H), 0.92 (d,  $J = 3.5$  Hz, 6H), 0.84 (s, 3H).

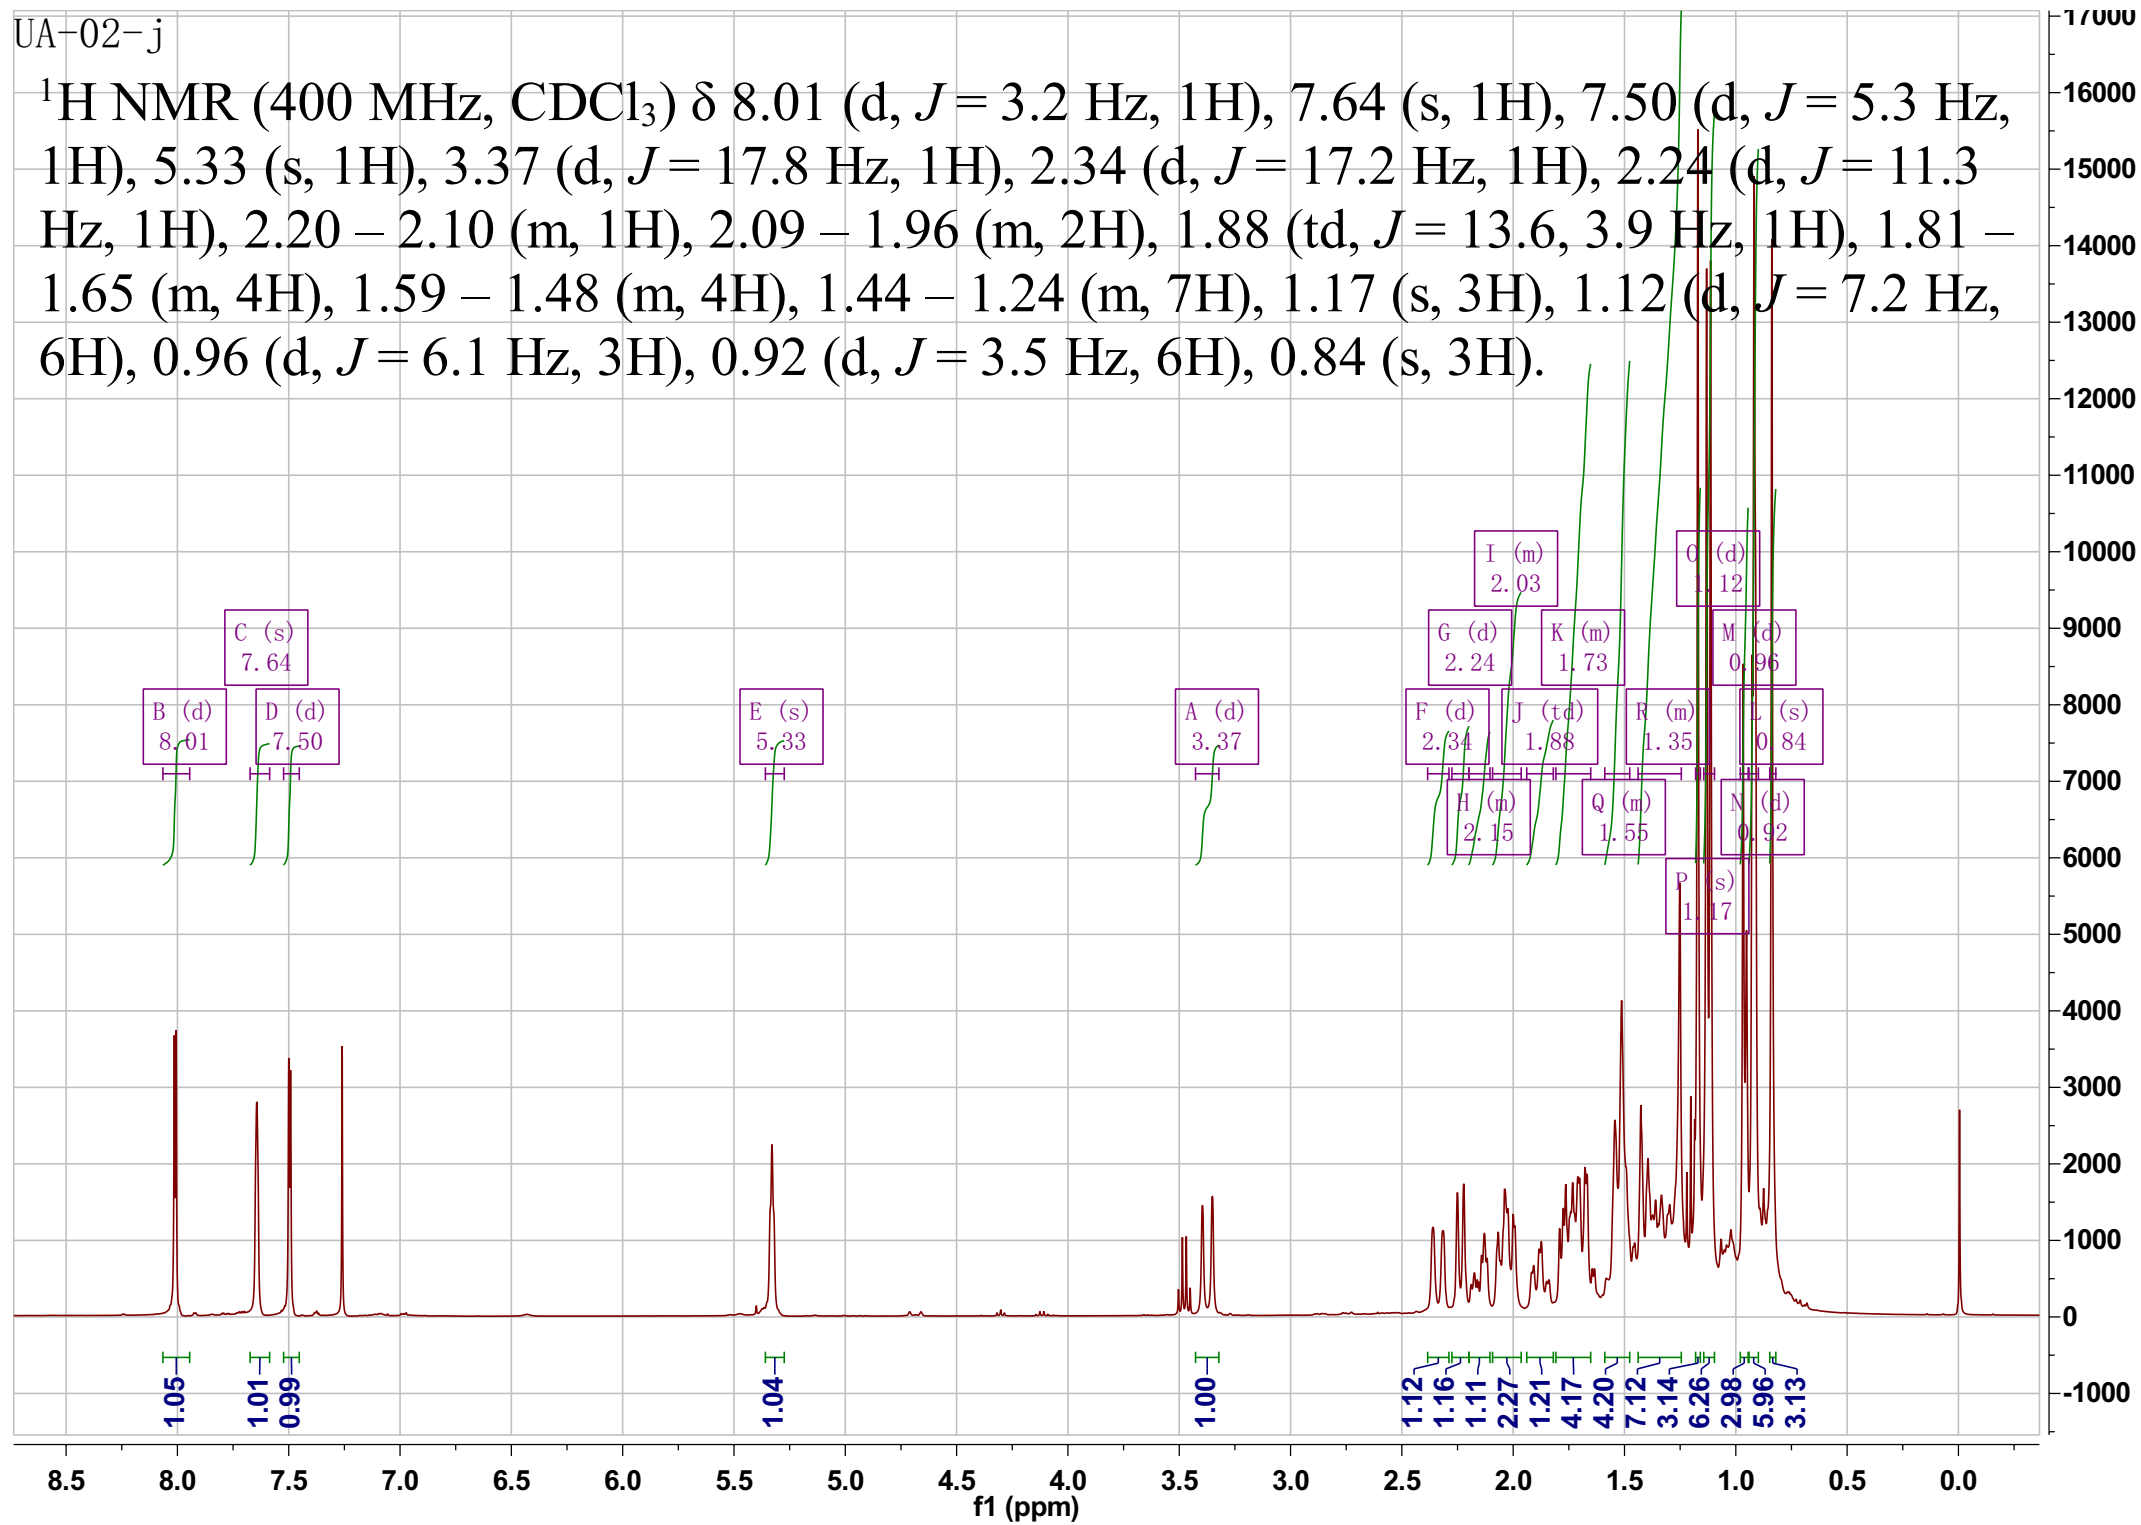

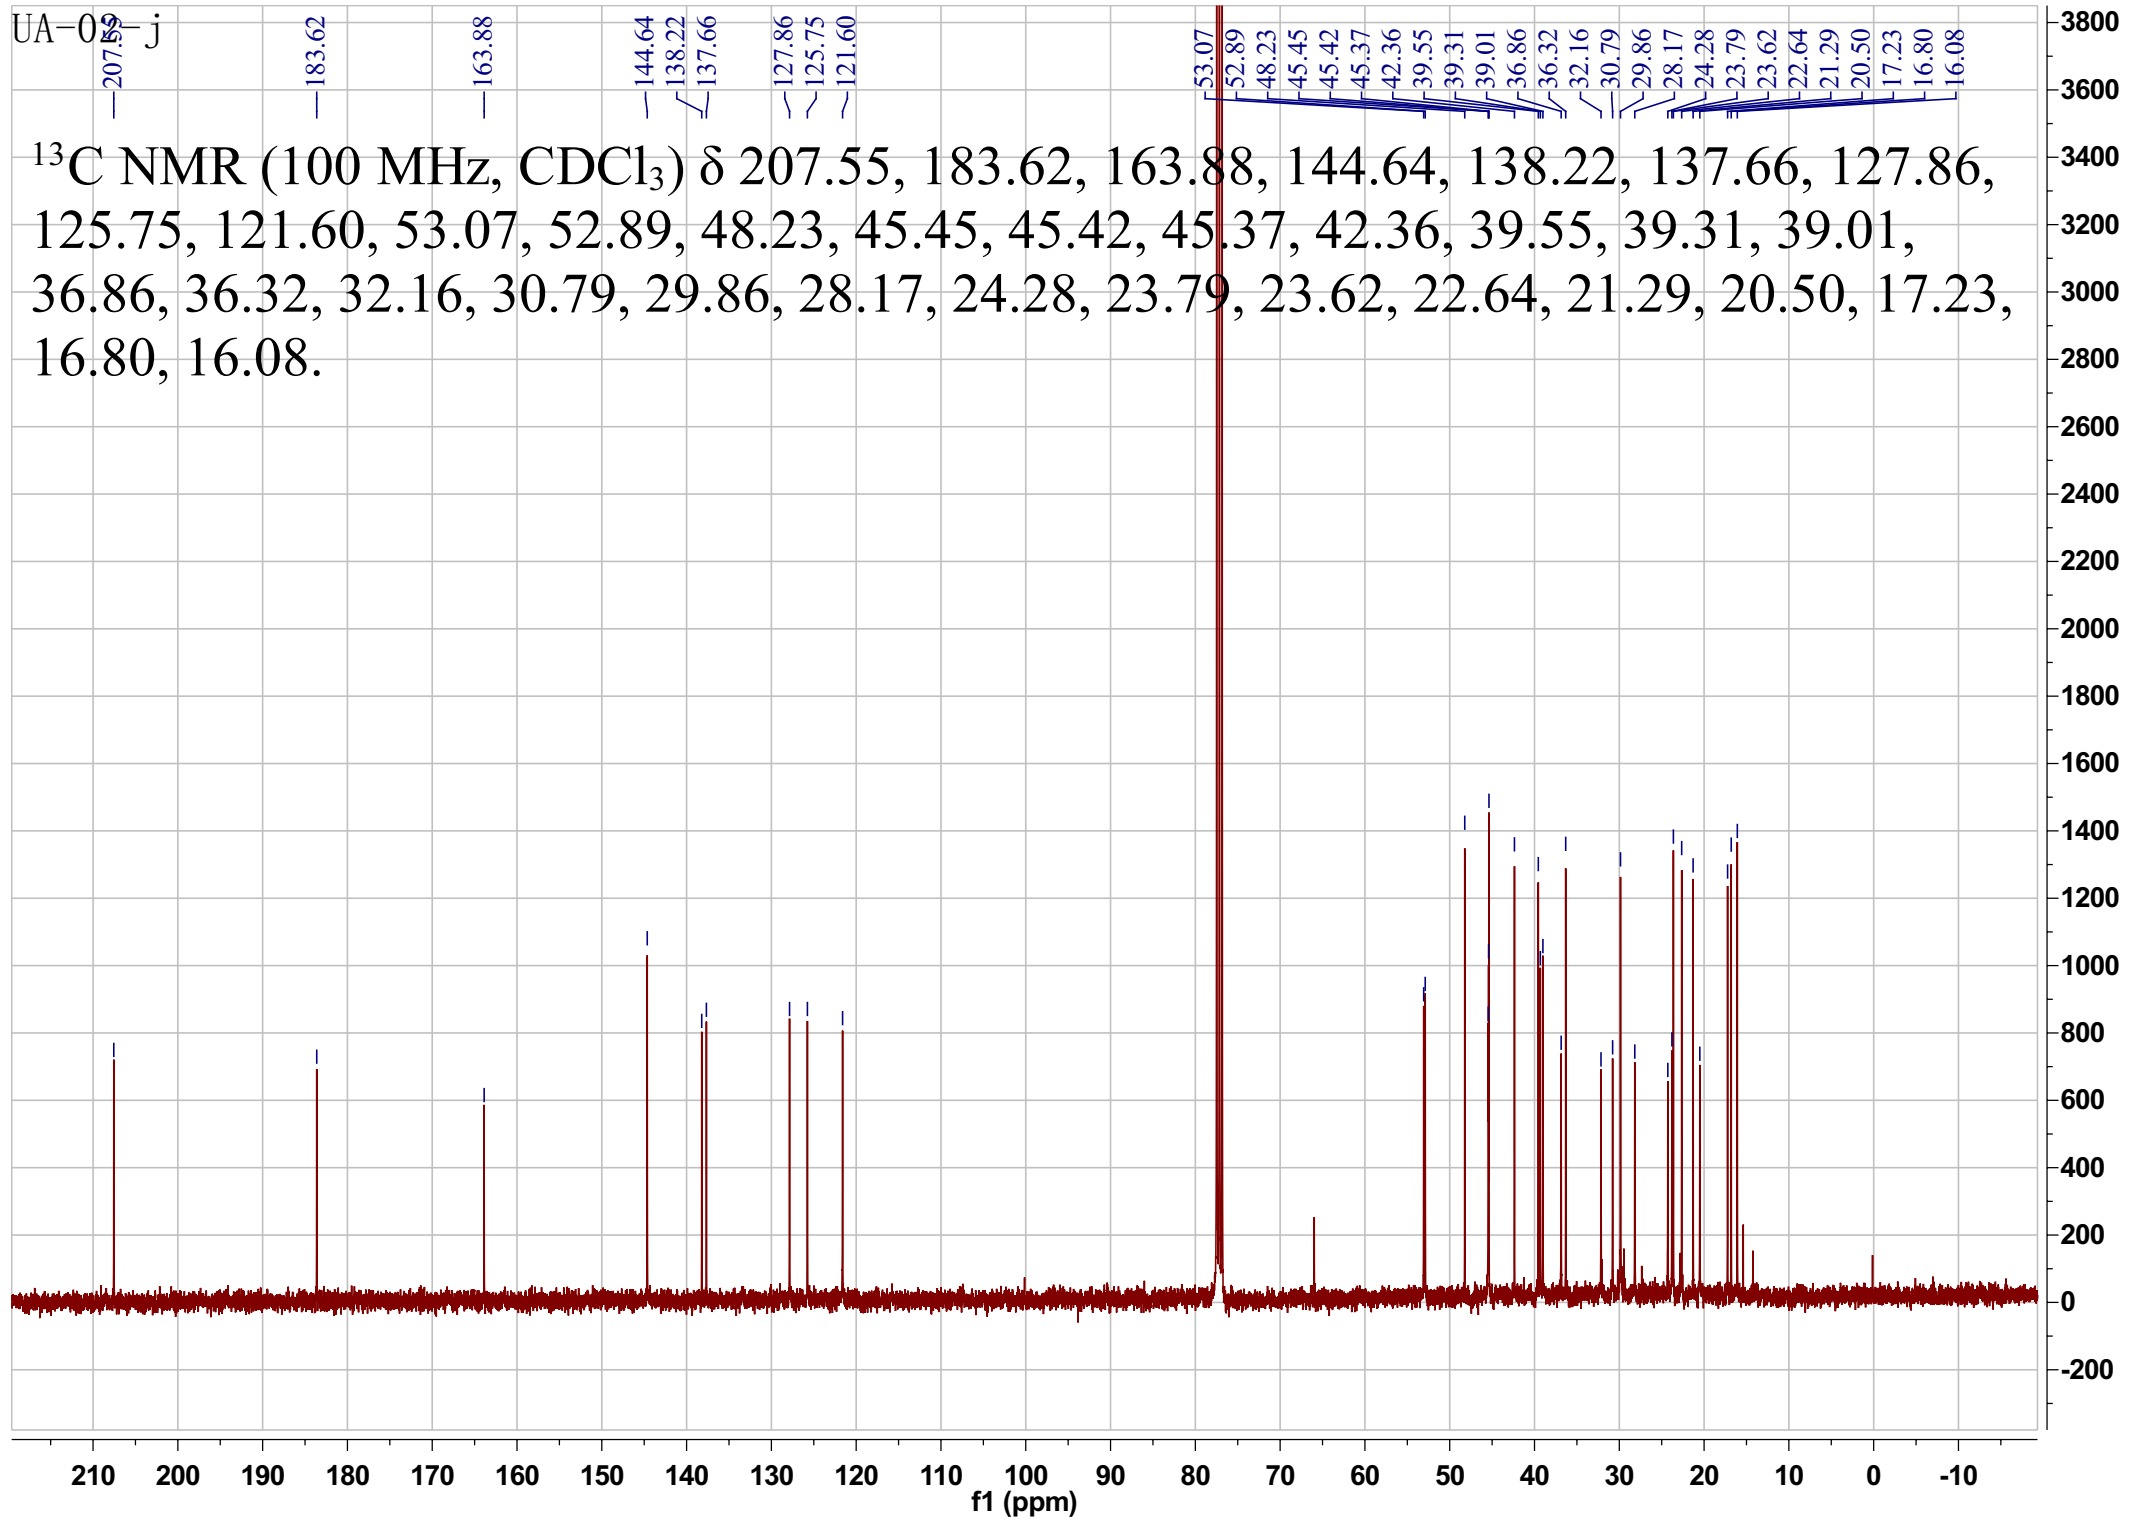



Compound code: UA-O-i

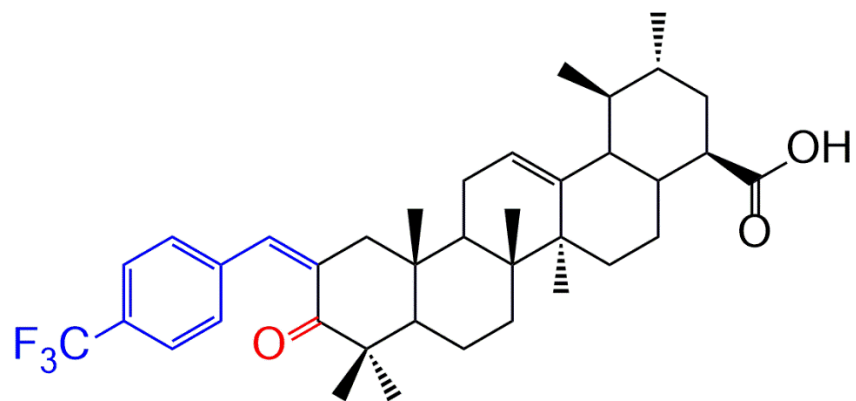

Figure 14. The structure of compound UA-O-i.

UA-02-K

$^1\text{H}$  NMR (400 MHz,  $\text{CDCl}_3$ )  $\delta$  7.67 (d,  $J = 8.2$  Hz, 2H), 7.51 (d,  $J = 8.5$  Hz, 3H), 5.27 (t,  $J = 3.2$  Hz, 1H), 2.98 (d,  $J = 16.3$  Hz, 1H), 2.34 – 2.14 (m, 2H), 2.09 – 1.97 (m, 1H), 1.94 (dd,  $J = 8.6, 3.2$  Hz, 2H), 1.86 (td,  $J = 13.7, 4.0$  Hz, 1H), 1.78 – 1.61 (m, 4H), 1.59 – 1.46 (m, 4H), 1.46 – 1.18 (m, 6H), 1.14 (d,  $J = 7.9$  Hz, 9H), 1.08 – 0.99 (m, 1H), 0.96 (d,  $J = 6.1$  Hz, 3H), 0.90 (d,  $J = 5.7$  Hz, 3H), 0.87 (s, 3H), 0.81 (s, 3H).

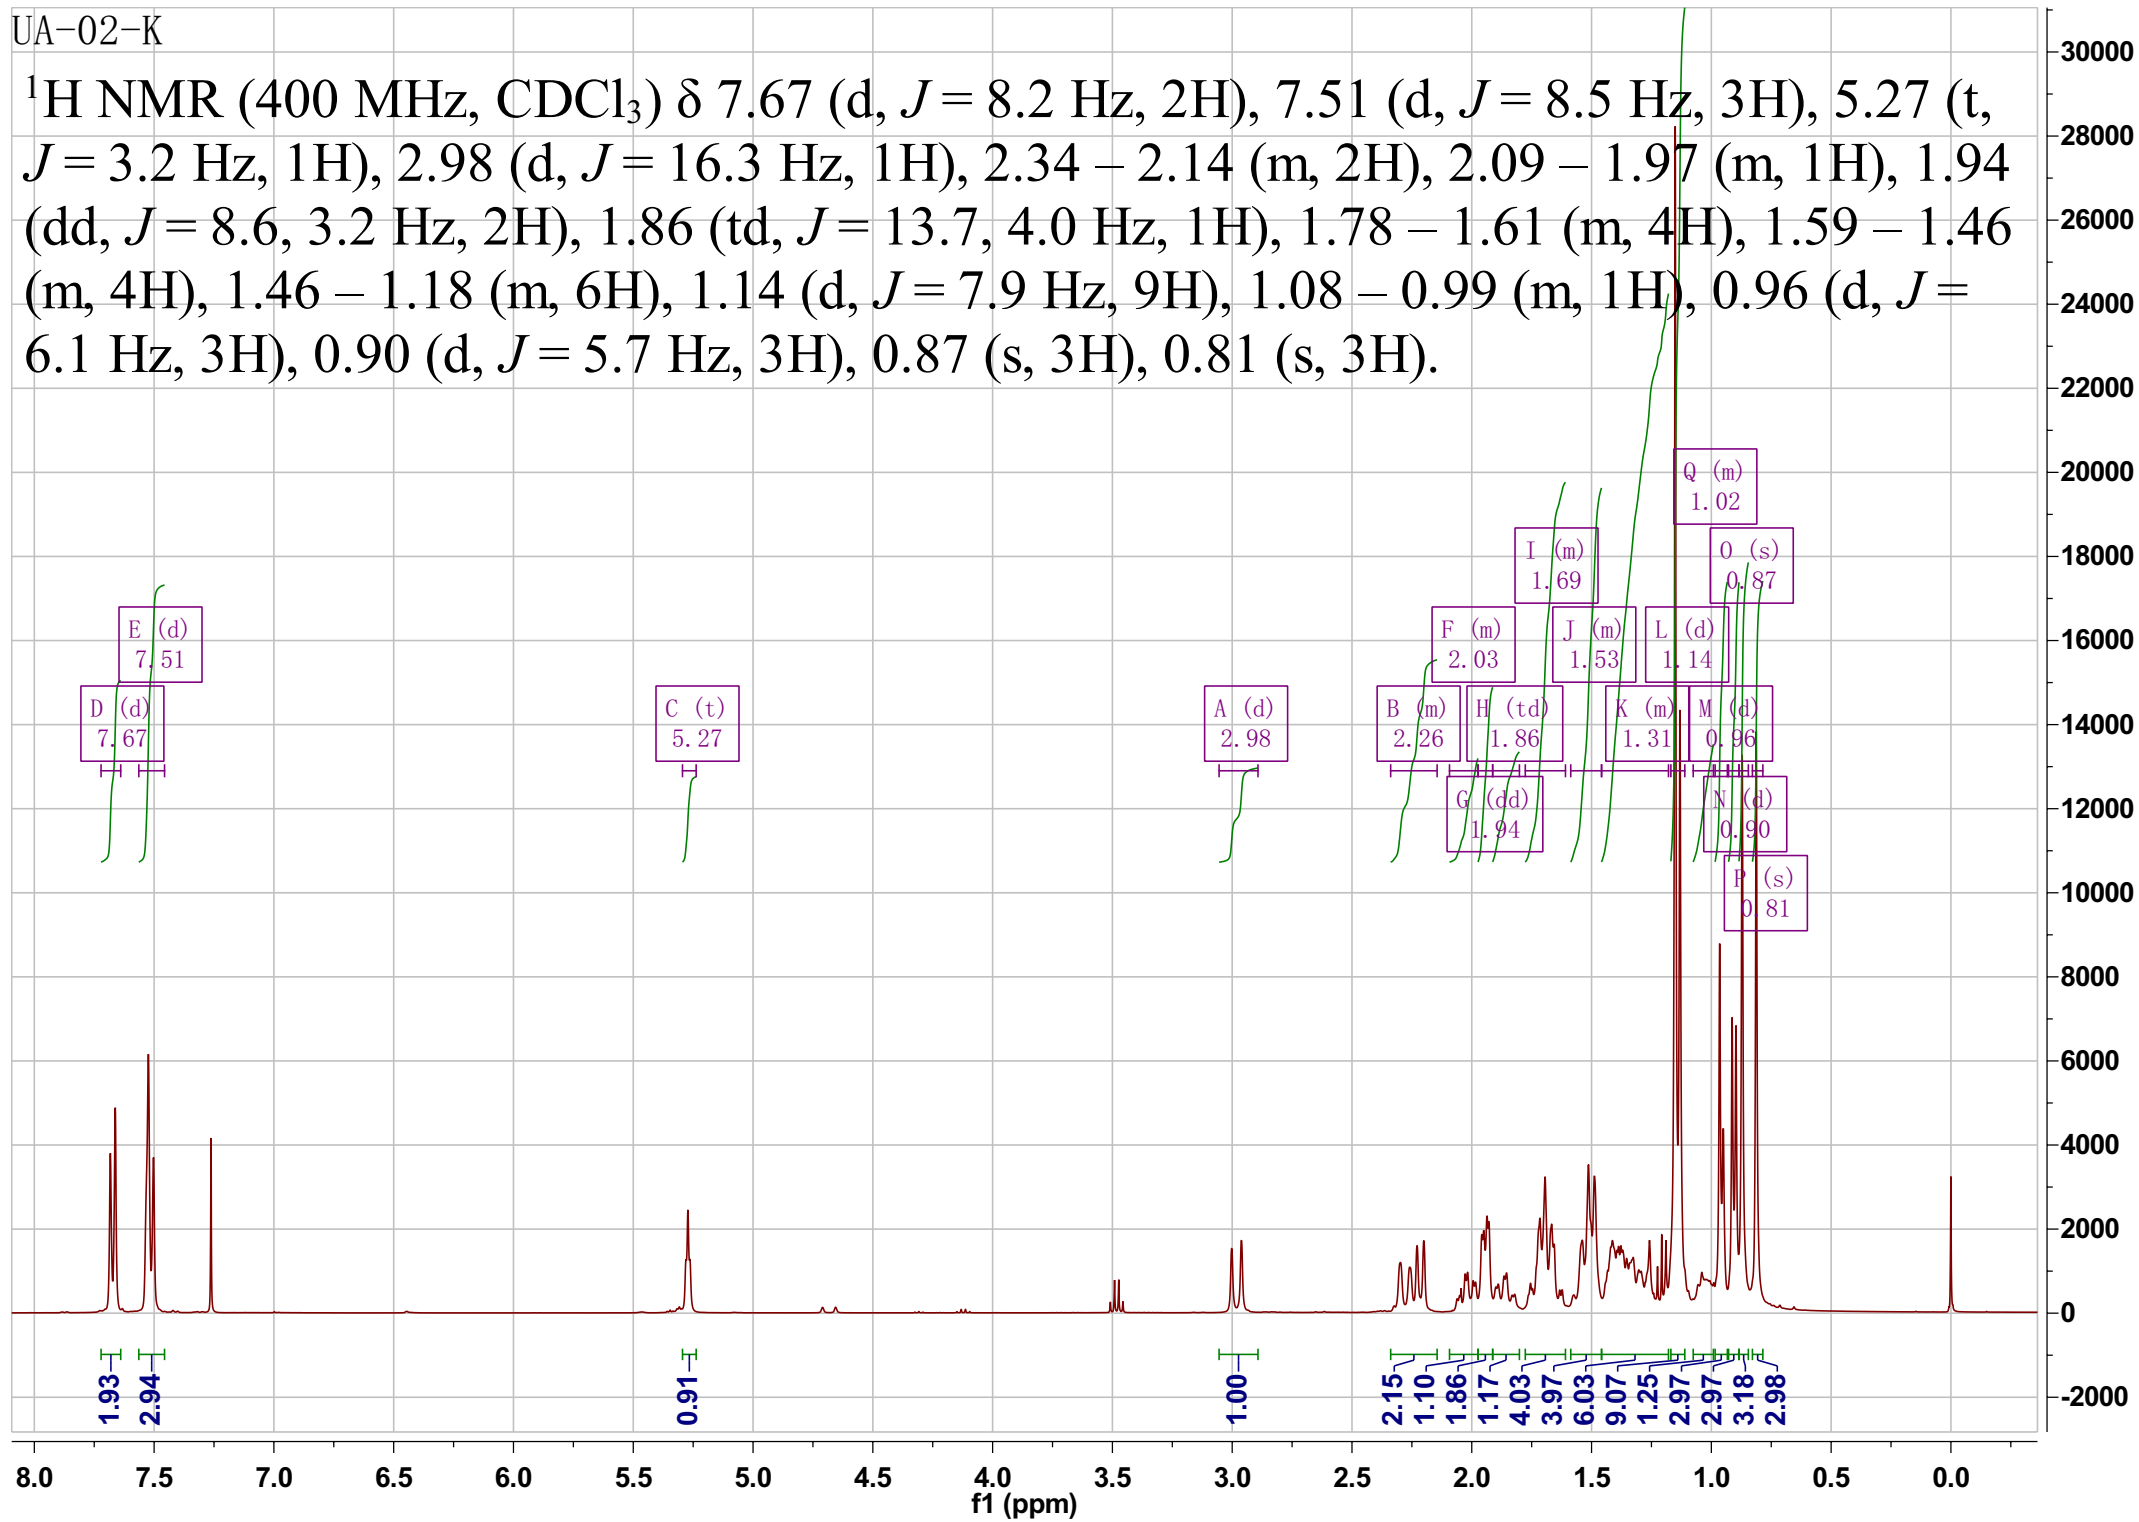

UA-09-K

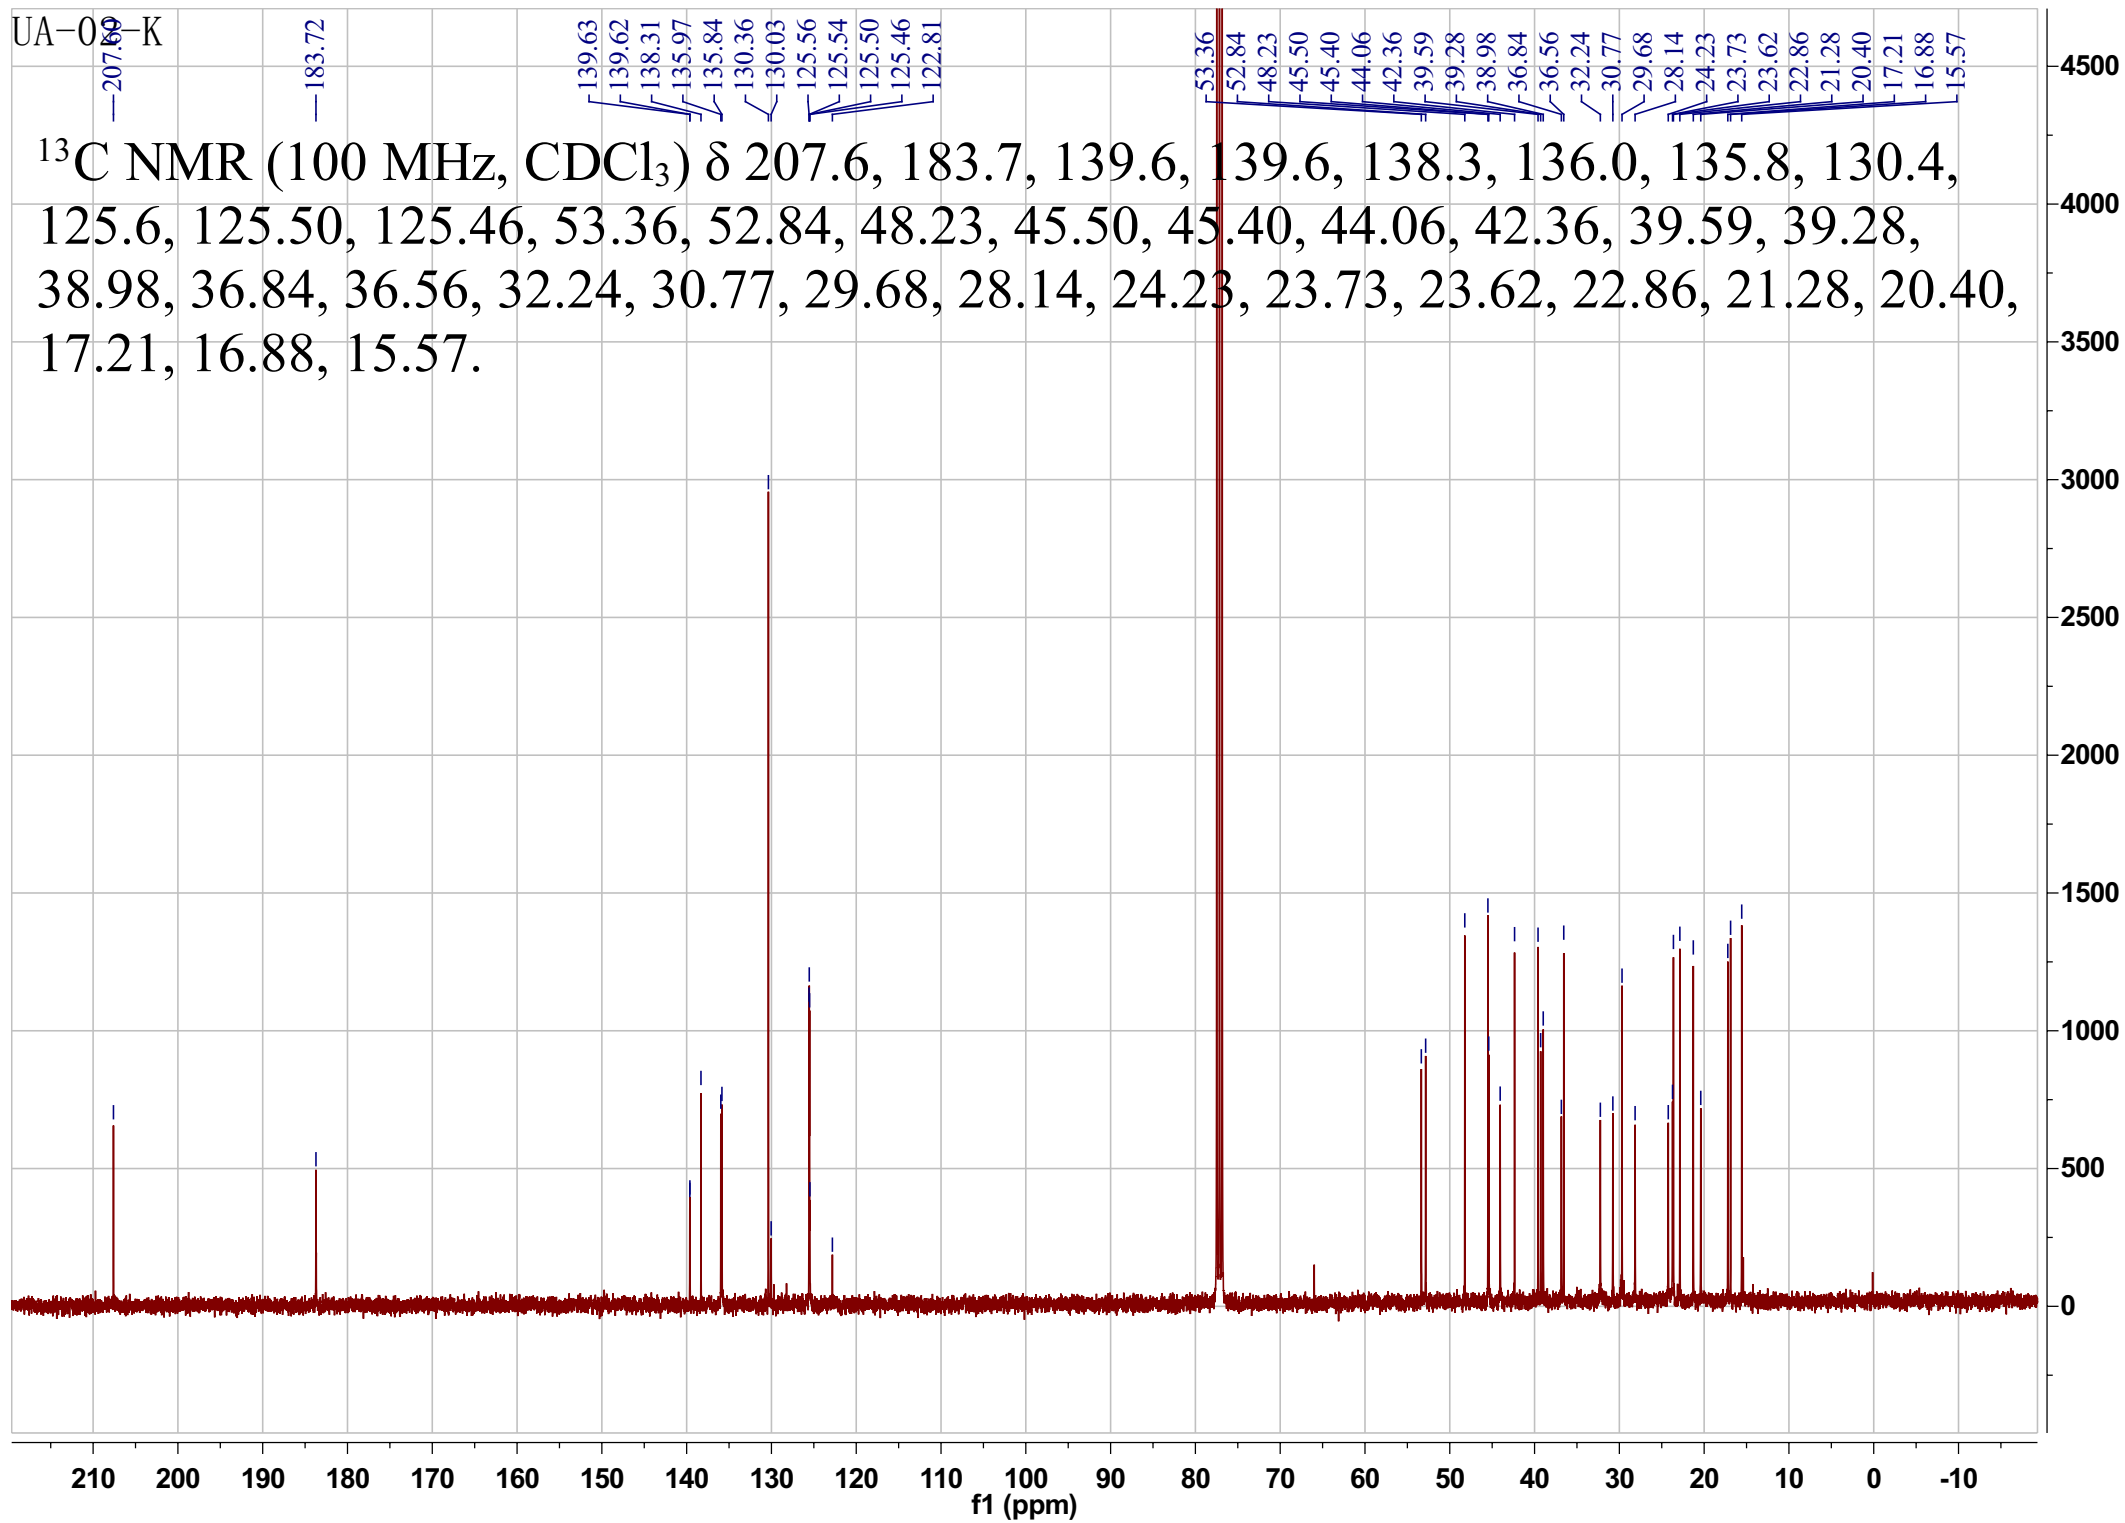

**Compound code: UA-O-j**

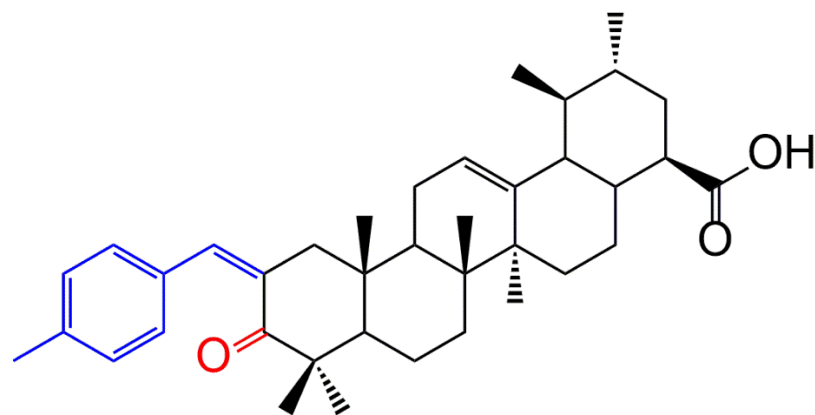

**Figure 15. The structure of compound UA-O-j.**

UA-02-L

$^1\text{H}$  NMR (400 MHz,  $\text{CDCl}_3$ )  $\delta$  7.53 (s, 1H), 7.35 (d,  $J = 8.0$  Hz, 2H), 7.23 (d,  $J = 7.9$  Hz, 2H), 5.28 (s, 1H), 3.03 (d,  $J = 16.2$  Hz, 1H), 2.38 (s, 3H), 2.31 – 2.24 (m, 1H), 2.22 (d,  $J = 11.4$  Hz, 1H), 2.09 – 1.93 (m, 3H), 1.86 (td,  $J = 13.4, 3.8$  Hz, 1H), 1.78 – 1.61 (m, 4H), 1.59 – 1.45 (m, 4H), 1.45 – 1.33 (m, 4H), 1.26 (s, 3H), 1.14 (d,  $J = 3.3$  Hz, 9H), 0.96 (d,  $J = 6.0$  Hz, 3H), 0.91 (d,  $J = 6.4$  Hz, 3H), 0.87 (s, 3H), 0.81 (s, 3H).

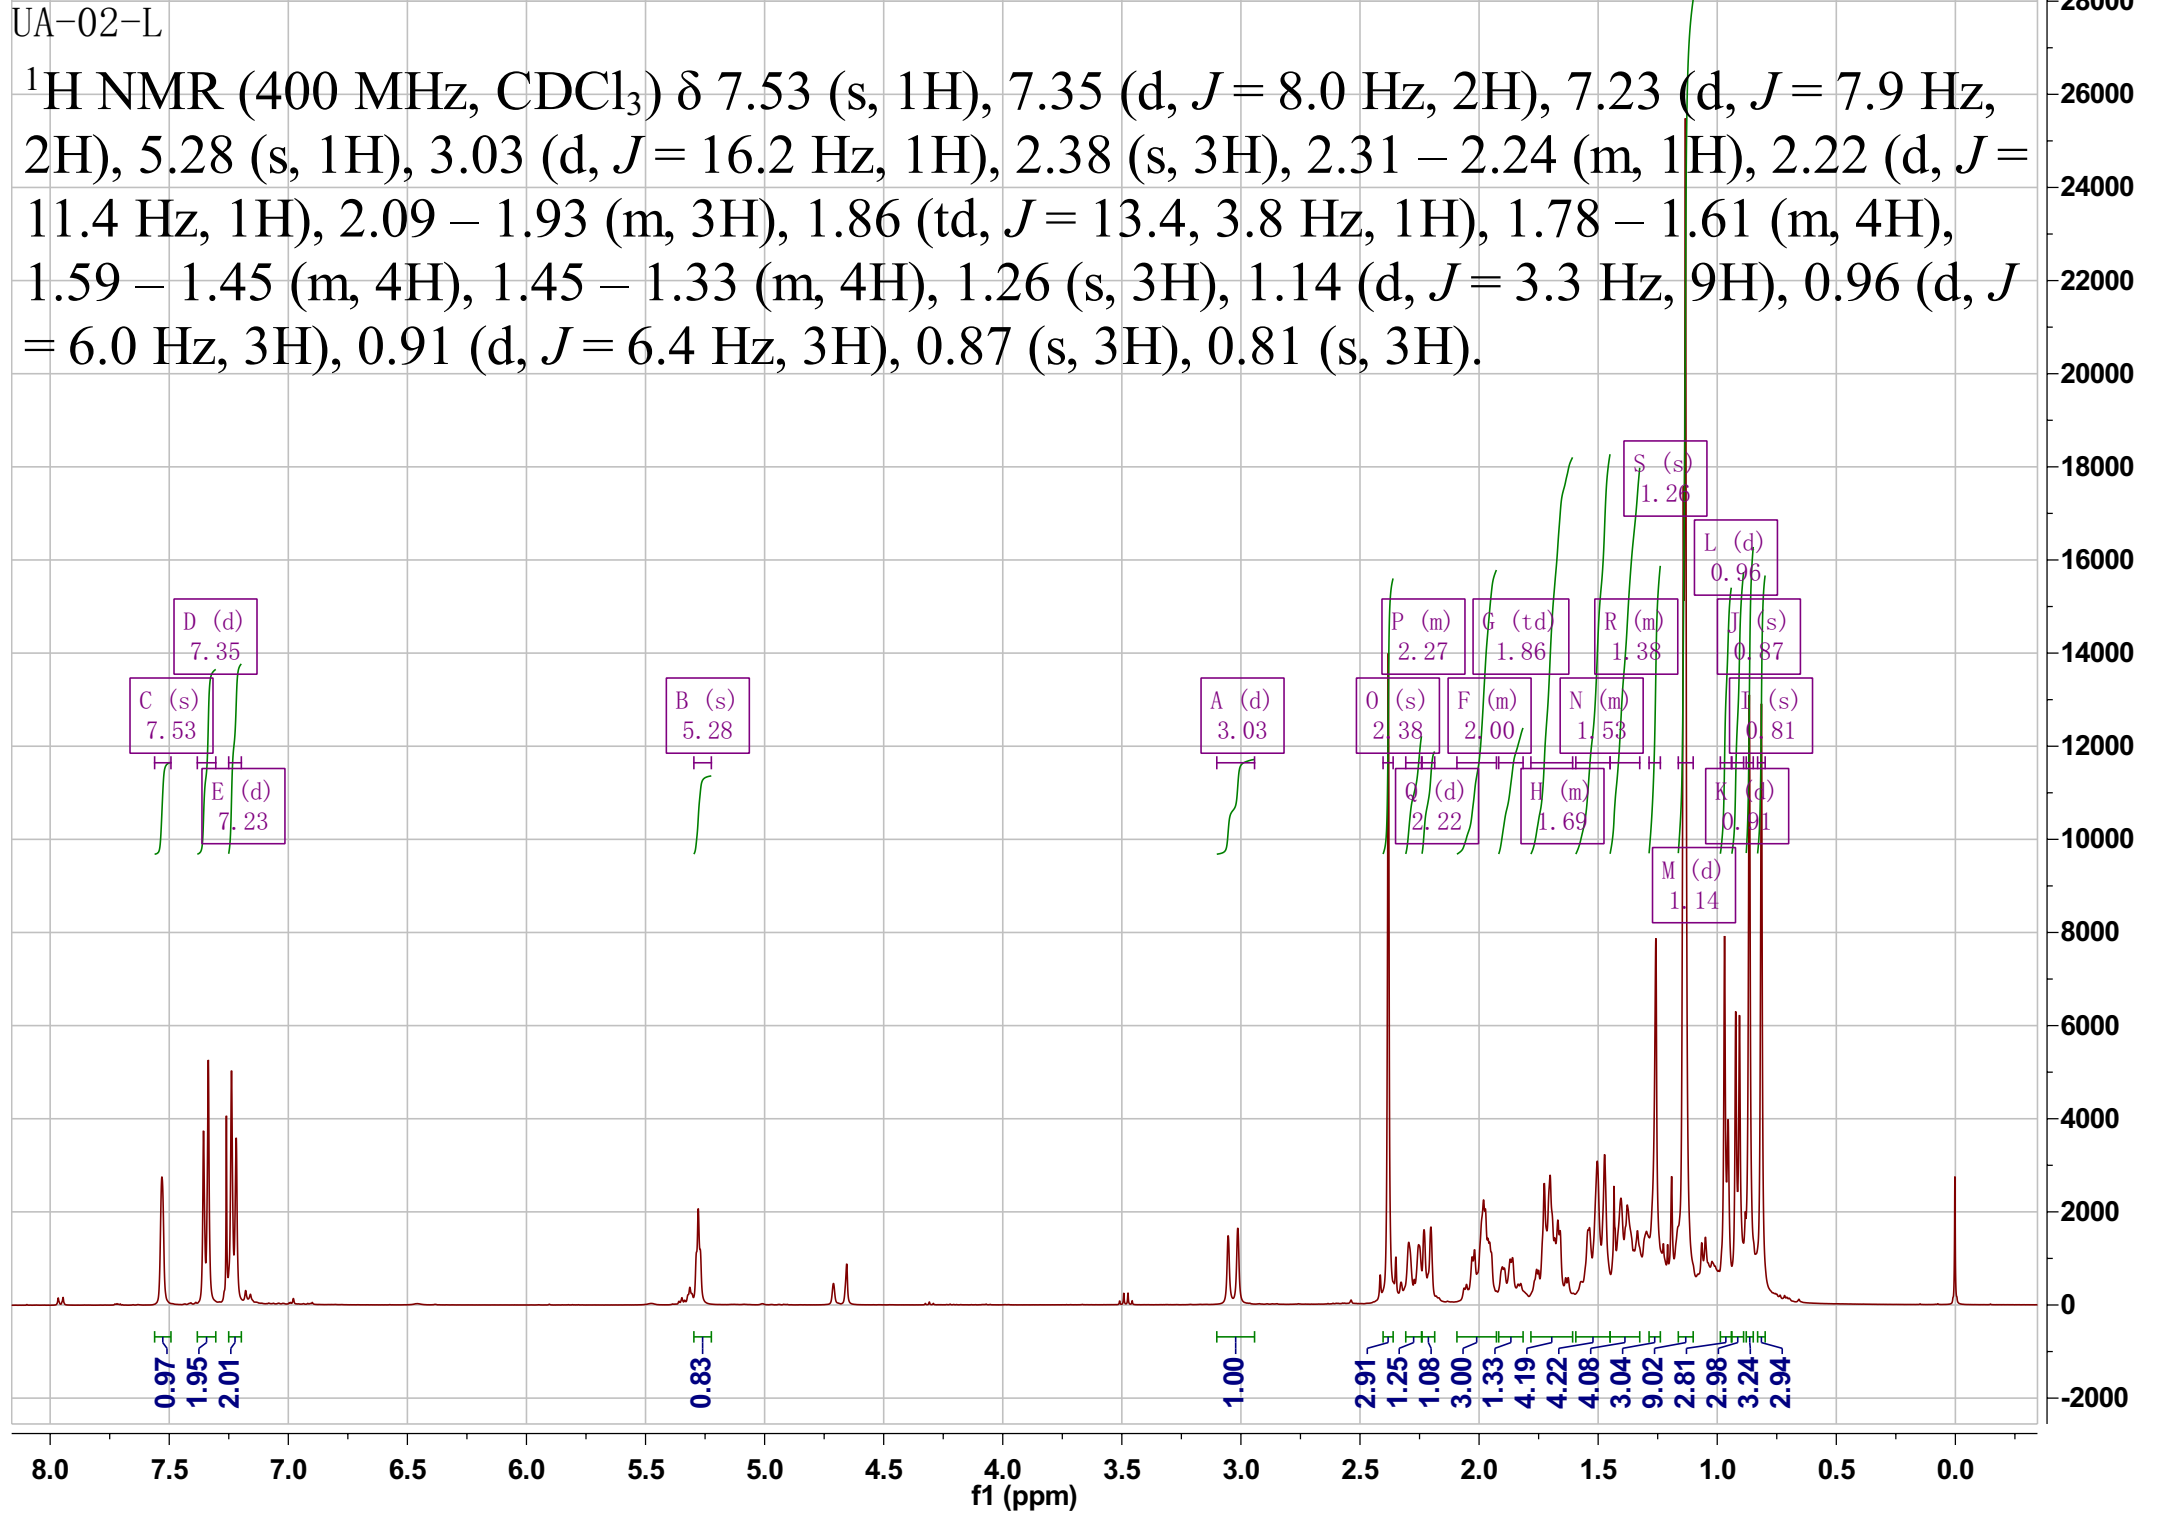

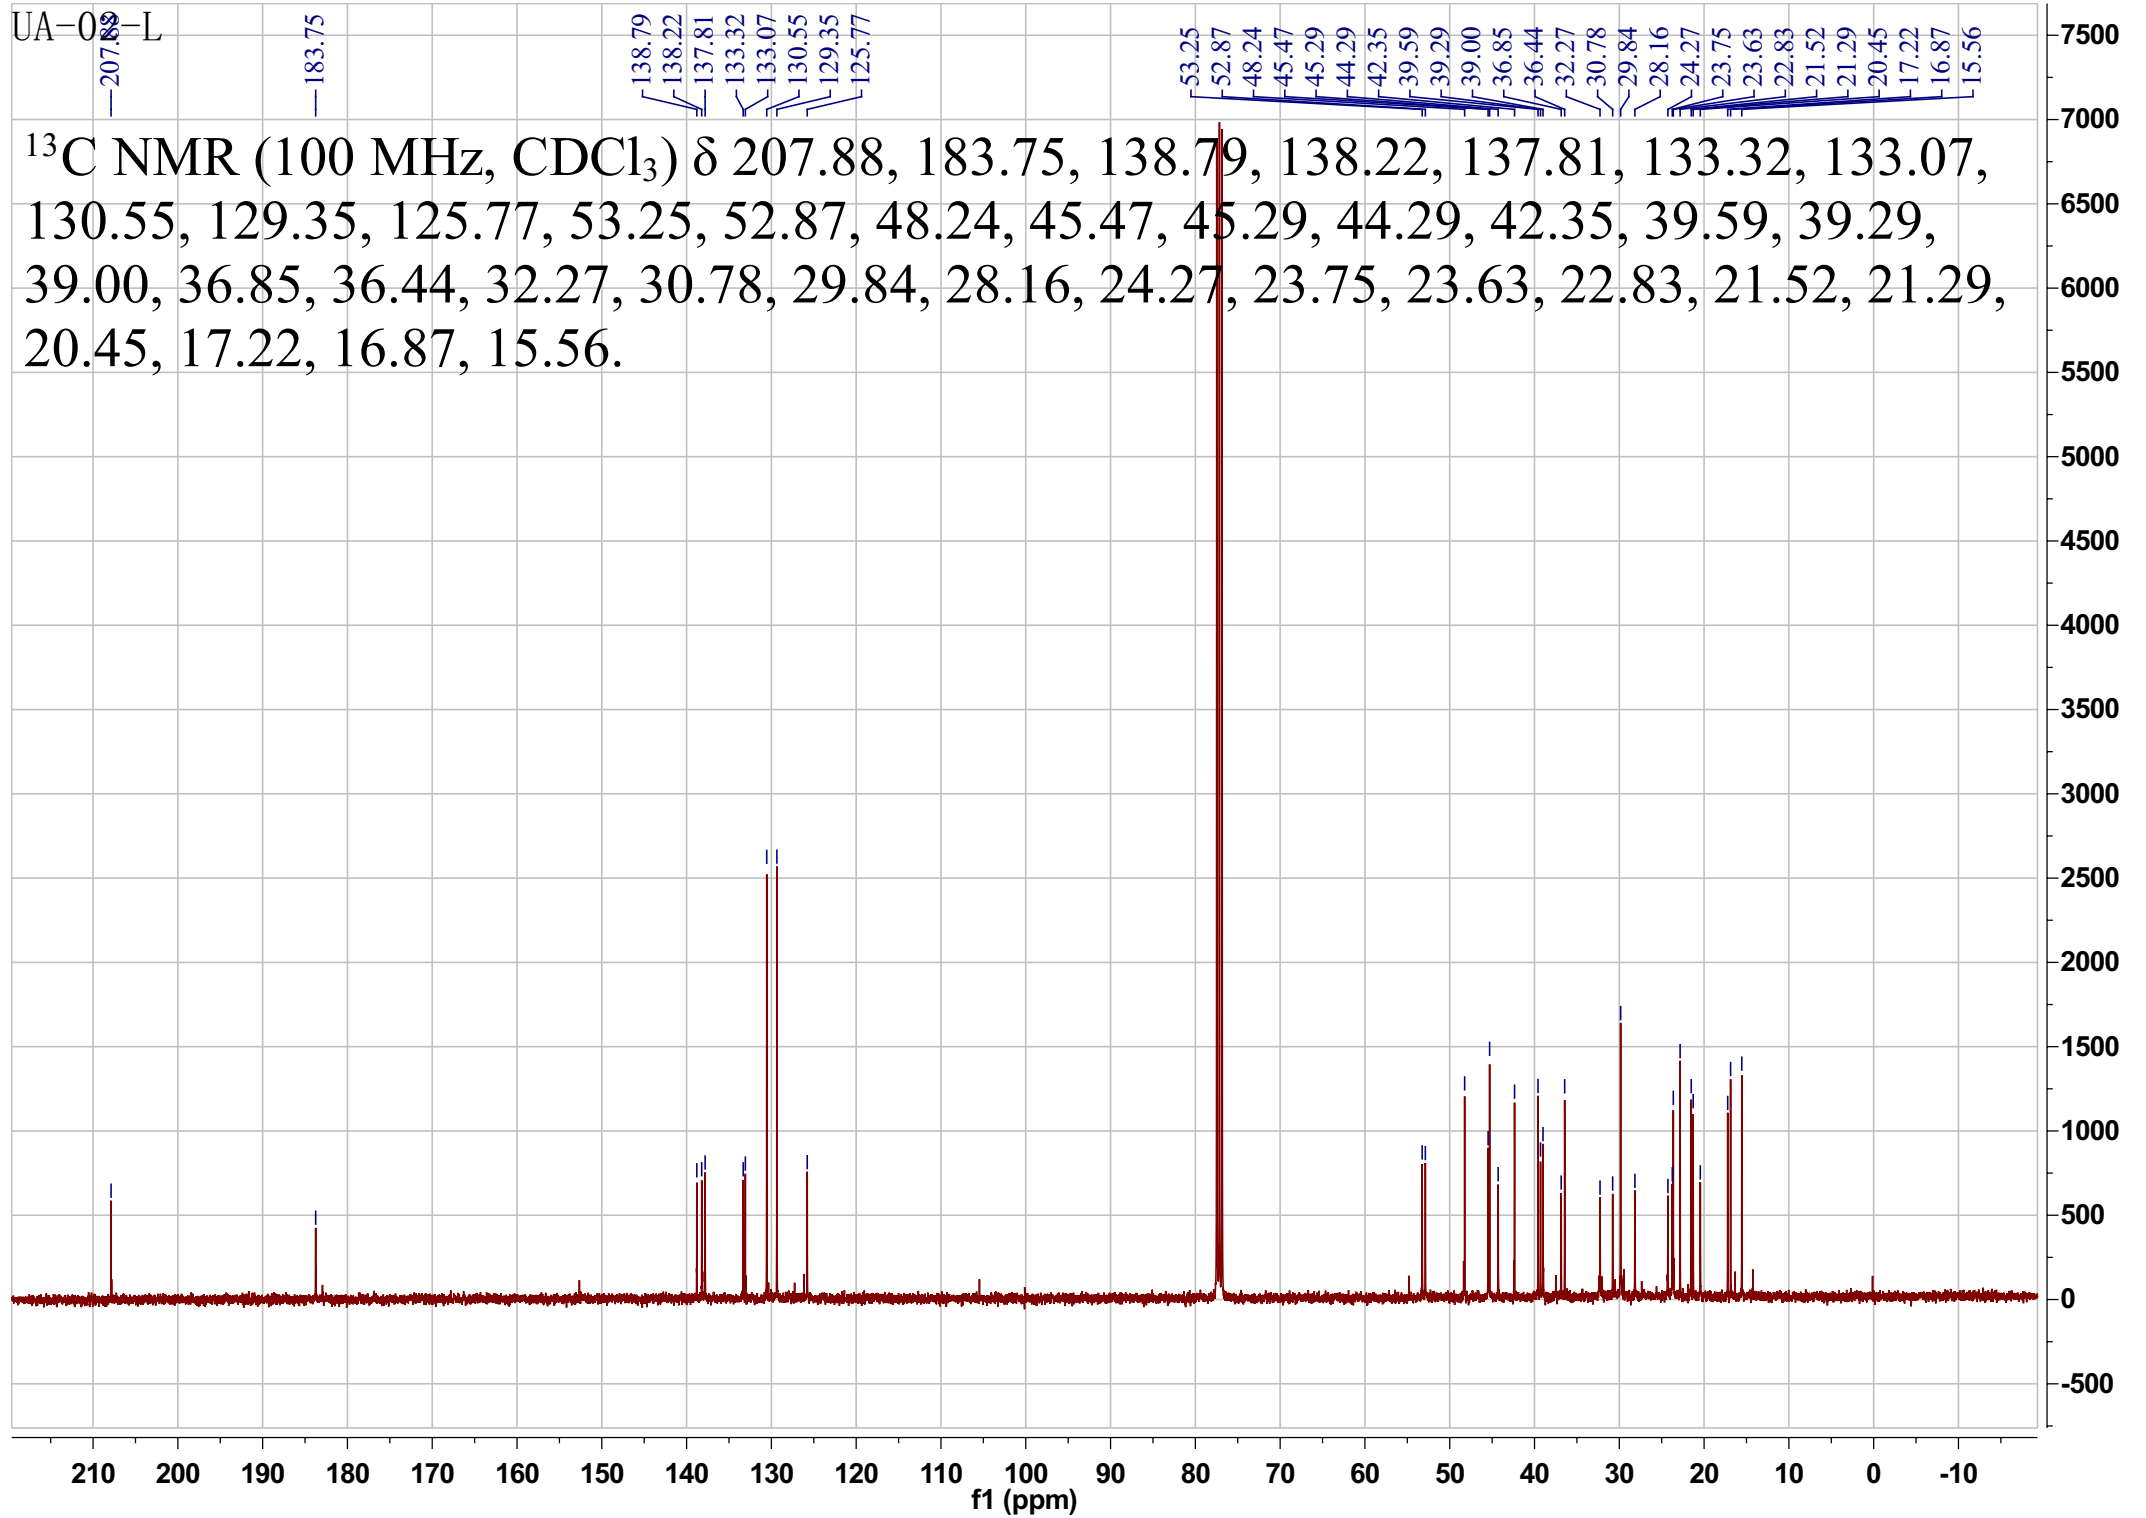

Supplement: srep45578-s1.pdf [file srep45578-s1.pdf]
